# Supplementary material
Source: PubMed Central journal article supplement (PMC2665772)

## **Materials and Methods**

### **RNA preparation**

Total RNA was extracted from lymphoblastoid cell lines of the 210 unrelated individuals of the HapMap (1) (Coriell, Camden, New Jersey, United States). Two, one-quarter scale Message Amp II reactions (Ambion, Austin, Texas, United States) were performed for each RNA extraction using 200 ng of total RNA as previously described (2). 1.5  $\mu$ g of the cRNA was hybridized to an array.

### **Gene expression quantification**

To assay transcript levels in the cell lines, we used Illumina's commercial whole genome expression array, Sentrix Human-6 Expression BeadChip (Illumina, San Diego, California, United States) (3). These arrays utilize a bead pool with ~48,000 unique bead types (one for each of 47,294 transcripts, plus controls), each with several hundred thousand gene-specific 50mer probes attached.

On a single BeadChip, six arrays were run in parallel. Each bead type (probe) is present on a single array on average 30 times. Each of the two IVT reactions from the 210 samples was hybridized to two arrays each, so that each cell line had four replicate hybridizations. cRNA was hybridized to arrays, and subsequently labelled with Cy3-streptavidin (Amersham Biosciences, Little Chalfont, United Kingdom) and scanned with a Bead Station (Illumina) as previously described (2). The full dataset is submitted to Gene Expression Omnibus under submission number series: GSE6536.

### **Post-experimental raw data processing**

#### **Normalization**

With the Illumina bead technology, a single hybridization of RNA from one cell line to an array produces on average approximately 30 intensity values for each of 47,294 bead types. These background-corrected values for a single bead type are subsequently summarized by Illumina software and output to the user as a set of 47,294 intensity values for each individual hybridization (4). In our experiment, each

cell line was hybridized to 4 arrays, thus resulting in 4 reported intensity values (as averages of the values from the 30 beads per probe) for each of the 47,294 bead types. To combine data from our multiple replicate hybridizations, raw data were read using the beadarray R package(5) and then normalized on a log scale using a quantile normalization method(6) across replicates of a single individual, followed by a median normalization method across individuals of a single population. These normalized values (for each probe, across replicates for each individual) are used in subsequent analyses.

### **Association analyses**

The association analysis employed: 1) Normalized quantitative gene expression measurements for the same samples using the Illumina Sentrix Human-6 Expression BeadChip, 2) SNP genotypes for the unrelated individuals of each HapMap population with minor allele frequency above 5% from the HapMap phase I map (rs numbers from HapMap version 16c.1, with genotypes extracted from HapMap version 20), and 3)  $\log_2$  ratios from comparative genomic hybridization (CGH) of each HapMap individual against a common reference on an array comprising 26,564 large-insert clones (7). In addition, we filtered the CGH clone set on the basis of being called as being copy number variable in at least 2 HapMap individuals (7), thus representing a set of 1322 'CNV clones' containing replicated CNVs.

Of the 47,294 probes for which we collected expression data, we selected the intersection of the top 18,000 most variable probes in each of the 4 populations. This provided a set of 13,797 probes that are variable within all 4 populations. We also selected an additional set of probes that have large differences in rank variability between populations. To select this set, we ranked all transcripts by variability within each population and made all pairwise comparisons between populations to quantify difference in rank of each probe between each pair of populations. We selected the top 1% (473) transcripts with largest absolute value rank difference from each population pair comparison, and took the union of the lists; this provided an additional 2,021 probes. After removing probes that mapped to chromosome X or Y, or to the

mitochondrion genome, or that had no match to the human genome build 35, 14,925 probes remained for analysis.

For each of the selected probes interrogating expression and for each SNP, we fit a linear regression model as previously described (2). To test each probe- CGH-clone association, we fit the same model, the only difference being that the clone CGH-array data is continuous in nature ( $\log_2$  ratios), as opposed to the discrete genotypic data. P-value distributions for each population are shown in Supplementary Figure 1. Note that it has previously been shown that SNPs in expression probes account for a negligible proportion of significant associations (2), and so will not perturb these distributions.

### **Multiple-test correction**

In order to assess significance of associations of expression variation to SNP genotype or copy number variation, we performed 10,000 permutations of each expression phenotype relative to the genotypes or CGH- $\log_2$  ratios. For associations to each type of data, we performed a *cis* analysis. For the SNP-expression association, we limited the analysis to those probes and SNPs where the distance from probe genomic midpoint to SNP genomic location was less than or equal to 1Mb. For the expression-CNV analysis, we conditioned on a distance of 2Mb from probe midpoint to CGH-clone midpoint. An association to a gene expression phenotype was considered significant if the p-value from the analysis of the observed data was lower than the threshold of the 0.001 tail of the distribution of the minimal p-values (among all comparisons for a given gene) from 10,000 permutations of the expression phenotypes (8, 9).

### **Accession Numbers**

The expression data reported in this paper have been deposited in the Gene Expression Omnibus (GEO) (<http://www.ncbi.nlm.nih.gov/geo>) database (Series Accession Number pending).

1. IHMC, *Nature* **437**, 1299 (Oct 27, 2005).
2. B. E. Stranger *et al.*, *PLoS Genet* **1**, e78 (Dec, 2005).
3. K. Kuhn *et al.*, *Genome Res* **14**, 2347 (Nov, 2004).
4. M. J. Dunning, N. P. Thorne, I. Camilier, M. L. Smith, S. Tavare, *Revstat* **4**, 1 (2006).
5. M. J. Dunning, D. R. Smith, N. P. Thorne, S. Tavare, *R News* **Submitted** (2006).
6. B. M. Bolstad, R. A. Irizarry, M. Astrand, T. P. Speed, *Bioinformatics* **19**, 185 (Jan 22, 2003).
7. R. Redon *et al.*, *Nature* **in press** (2006).
8. G. A. Churchill, R. W. Doerge, *Genetics* **138**, 963 (Nov, 1994).
9. R. W. Doerge, G. A. Churchill, *Genetics* **142**, 285 (Jan, 1996).

## SUPPL. FIGURE AND TABLE LEGENDS

**Fig. S1.** Genomic location of significant *cis*- associations for (A) SNP-expression associations and (B) CNV clone-expression associations.

**Fig. S2.** Examples of SNP-expression and clone-expression associations in the four HapMap populations. (A) clone-expression association for *SMN2*; chr5. Significant associations between clones and expression are observed in CEU, CHB, and JPT, but not in YRI. (B) SNP-expression and clone-expression associations in the four HapMap populations. SNP-expression and clone-expression association for *GBP3*; chr1. Both SNPs and clones are significantly associated with expression of *GBP3* in CEU, CHB, and JPT, but not in YRI. In each plot, dotted lines show the 0.001 permutation significance threshold. For clone-expression associations, all clones in the window are shown, however the significance threshold was determined by permuting data only from those clones in CNVs where the CNV was present in at least two HapMap individuals. All coordinates shown are from Build 35 of the human genome. Inset panels show the relationship between mRNA levels and SNP genotypes or clone  $\log_2$  ratios, for the most significant clone or SNP in that population, which may differ across populations.

**Fig. S3.** Distribution of p-values for all SNP-expression associations (SNP-probe distance < 1Mb) and all CGH-clone-expression associations (clone midpoint-probe distance < 2Mb) for each of the four HapMap populations. P-values from SNP associations are shown in red, CGH-clone associations are in black.

**Table S1** Number of genes and overlaps between permutation sets for SNPs and CNVs.

**Table S2.** Significant associations between SNPs and gene expression phenotypes with  $p < 0.001$ , listing only the most significant association for each gene in each population.

**Table S3.** Significant associations between all CGH-clones and gene expression phenotypes with  $p < 0.001$ , listing only the most significant association for each gene in each population.

**Table S4.** Significant associations between CNV clones and gene expression phenotypes with  $p < 0.001$ , listing only the most significant association for each gene in each population.

**Table S5.** Significant associations at permutation corrected  $p < 0.001$  within 6 Mbs from genotypable CNVs in CEU and YRI.

## Permutation Stability

In theory when one attempts to estimate the threshold at  $p\text{-value} = 0.001$  with 10,000 permutations, the estimate of the  $p\text{-value}$  is  $0.001 \pm 0.00032$  (mean  $\pm$  S.E.), based on the binomial distribution, so even with 10,000 permutations the estimate of the threshold is pretty good. We have empirically addressed this by performing another set of 10,000 permutations for each of the four populations and for both SNPs and CNV-clones. In table S1 we report the numbers of genes determined as significant in the original analysis, the new analysis and their overlap. It becomes apparent that the overlap is very high ranging from 90% to 98% between the two sets of analysis. In addition, for CEU we have performed an additional set of 50,000 permutations for both SNPs and CNV-clones. For 50,000 permutations the estimate of  $p\text{-value}$  is  $P = 0.001 \pm 0.00014$ . Again the numbers and proportions of overlap are very high at 96-100%. Both the theoretical and empirical approaches show that the estimates of thresholds in our manuscript are quite robust, given the number of permutations we have performed, and therefore the subsequent analyses are also robust and stable.

**Table S1:** Numbers of genes and overlaps between permutation sets for SNPs and CNVs

| <b>SNP analysis: permutation threshold 0.001</b> |          |      |                               |                                          |
|--------------------------------------------------|----------|------|-------------------------------|------------------------------------------|
| <b>#genes 10K permutations</b>                   |          |      |                               |                                          |
|                                                  | original | set2 | overlap of original with set2 | proportion overlap of original with set2 |
| CEU                                              | 323      | 329  | 313                           | 0.97                                     |
| CHB                                              | 348      | 348  | 333                           | 0.96                                     |
| JPT                                              | 370      | 363  | 349                           | 0.94                                     |
| YRI                                              | 411      | 408  | 394                           | 0.96                                     |

  

| <b>CNV-clone analysis: permutation threshold 0.001</b> |          |      |                               |                                          |
|--------------------------------------------------------|----------|------|-------------------------------|------------------------------------------|
| <b>#genes 10K permutations</b>                         |          |      |                               |                                          |
|                                                        | original | set2 | overlap of original with set2 | proportion overlap of original with set2 |
| CEU                                                    | 40       | 40   | 39                            | 0.98                                     |
| CHB                                                    | 32       | 33   | 31                            | 0.97                                     |
| JPT                                                    | 40       | 38   | 37                            | 0.93                                     |
| YRI                                                    | 42       | 40   | 38                            | 0.90                                     |

  

| <b>Comparison of thresholds with 10K vs. 50K permutations</b> |         |         |                 |                            |
|---------------------------------------------------------------|---------|---------|-----------------|----------------------------|
| <b>#genes associated with SNPs</b>                            |         |         |                 |                            |
|                                                               | 10K-set | 50K-set | overlap 10K-50K | proportion overlap 10K-50K |
| CEU-original                                                  | 323     | 324     | 312             | 0.98                       |
| CEU-set2                                                      | 329     | 324     | 316             | 0.96                       |

  

| <b>#genes associated with CNV-clones</b> |         |         |                 |                            |
|------------------------------------------|---------|---------|-----------------|----------------------------|
|                                          | 10K-set | 50K-set | overlap 10K-50K | proportion overlap 10K-50K |
| CEU-original                             | 40      | 42      | 40              | 1.00                       |
| CEU-set2                                 | 40      | 42      | 39              | 0.98                       |

Table S2: Most significant associations of SNPs with gene expression at 0.001

| Gene_label | Illumina_Gene_ID | SNP_rsID   | chromosome | SNP_location B35 | Distance SNP-probe midpoint(bp) | $-\log_{10}(\text{p-value})$ | Adjusted_R <sup>2</sup> | permutation threshold_10-4 | permutation threshold_10-3 | permutation threshold_10-2 | permutation threshold_0.05 | population |
|------------|------------------|------------|------------|------------------|---------------------------------|------------------------------|-------------------------|----------------------------|----------------------------|----------------------------|----------------------------|------------|
| ABC1       | GI_38142463-S    | rs8066241  | 17         | 55511931         | 36480                           | 8.1969                       | 0.434                   | 6.7                        | 5.21                       | 4.02                       | 3.22                       | CEU        |
| ABCD4      | GI_10947128-A    | rs2075025  | 14         | 73266439         | 555646                          | 5.4004                       | 0.2973                  | 6.61                       | 5.14                       | 4.15                       | 3.49                       | CEU        |
| ABHD6      | GI_34147685-S    | rs11130670 | 3          | 58633494         | 378180                          | 6.2899                       | 0.3438                  | 6.16                       | 5.43                       | 4.38                       | 3.63                       | CEU        |
| ACY1L2     | GI_37551403-S    | rs9342178  | 6          | 89913169         | 15399                           | 6.1804                       | 0.3382                  | 6.6                        | 5.72                       | 4.48                       | 3.76                       | CEU        |
| AD-017     | GI_8923854-A     | rs10865973 | 3          | 52693194         | 10629                           | 6.7454                       | 0.3877                  | 7.17                       | 5.21                       | 4.22                       | 3.48                       | CEU        |
| ADAT1      | GI_7382475-S     | rs7500366  | 16         | 75175416         | 984446                          | 5.6091                       | 0.313                   | 7.76                       | 5.6                        | 4.46                       | 3.66                       | CEU        |
| ADSS       | GI_34577062-S    | rs4658574  | 1          | 239976757        | 921601                          | 5.4984                       | 0.3025                  | 7.01                       | 5.36                       | 4.37                       | 3.63                       | CEU        |
| ARHGEF12   | GI_7662087-S     | rs7937444  | 11         | 120774936        | 909131                          | 5.5512                       | 0.3054                  | 6.18                       | 5.48                       | 4.52                       | 3.77                       | CEU        |
| ARNT       | GI_30795239-A    | rs1136774  | 1          | 147551270        | 44087                           | 6.1902                       | 0.3387                  | 5.51                       | 5.12                       | 4.08                       | 3.35                       | CEU        |
| ASAH1      | GI_30794501-S    | rs3796484  | 4          | 77231693         | 32603                           | 7.5113                       | 0.4084                  | 5.92                       | 5.32                       | 4.39                       | 3.64                       | CEU        |
| ATP13A     | GI_9966896-S     | rs2304130  | 19         | 19650528         | 33481                           | 7.555                        | 0.4105                  | 6.91                       | 5.82                       | 4.29                       | 3.47                       | CEU        |
| ATPIF1     | GI_30260191-I    | rs1283621  | 1          | 28263137         | 14761                           | 7.6681                       | 0.4271                  | 6.31                       | 5.17                       | 4.04                       | 3.29                       | CEU        |
| AXIN1      | GI_31083143-A    | rs393521   | 16         | 277679           | 20                              | 11.4131                      | 0.5598                  | 6.26                       | 5.61                       | 4.38                       | 3.64                       | CEU        |
| B7         | GI_42542401-A    | rs1007923  | 12         | 6884368          | 9239                            | 9.607                        | 0.5052                  | 6.64                       | 5.67                       | 4.59                       | 3.8                        | CEU        |
| BBS2       | GI_22208996-S    | rs13337155 | 16         | 55062225         | 13949                           | 10.6247                      | 0.5317                  | 7.02                       | 5.39                       | 4.39                       | 3.71                       | CEU        |
| BLK        | GI_33469981-S    | rs10100215 | 8          | 11399681         | 59607                           | 5.4493                       | 0.2999                  | 6.49                       | 5.43                       | 4.53                       | 3.73                       | CEU        |
| BTN3A2     | GI_34932495-S    | rs9379851  | 6          | 26462759         | 21356                           | 11.3811                      | 0.5587                  | 7.01                       | 5.38                       | 4.41                       | 3.64                       | CEU        |
| C10orf88   | GI_13376420-S    | rs4980169  | 10         | 124682576        | 1441                            | 6.0889                       | 0.3383                  | 6.02                       | 5.37                       | 4.53                       | 3.76                       | CEU        |
| C14orf130  | GI_28411949-A    | rs1263389  | 14         | 92737473         | 18971                           | 6.755                        | 0.367                   | 8.85                       | 5.73                       | 4.55                       | 3.8                        | CEU        |
| C14orf52   | GI_21553312-S    | rs4902332  | 14         | 64445731         | 25025                           | 25.2026                      | 0.8517                  | 6.85                       | 5.28                       | 4.37                       | 3.58                       | CEU        |
| C16orf5    | GI_7019336-S     | rs3747600  | 16         | 4526223          | 25313                           | 7.9686                       | 0.4294                  | 6.29                       | 5.47                       | 4.56                       | 3.77                       | CEU        |
| C1orf16    | GI_42476073-A    | rs2702178  | 1          | 180184202        | 70515                           | 10.9569                      | 0.55                    | 5.83                       | 5.5                        | 4.3                        | 3.51                       | CEU        |
| C20orf110  | GI_29745613-S    | rs6087733  | 20         | 33762042         | 997468                          | 5.5979                       | 0.3124                  | 8.14                       | 5.58                       | 4.29                       | 3.4                        | CEU        |
| C20orf22   | GI_34147330-S    | rs6107027  | 20         | 25236632         | 13023                           | 7.3459                       | 0.4006                  | 6.1                        | 5.23                       | 4.2                        | 3.45                       | CEU        |
| C21orf107  | GI_38026951-I    | rs2836926  | 21         | 39458660         | 25667                           | 15.9812                      | 0.699                   | 7.41                       | 6.04                       | 4.77                       | 4                          | CEU        |
| C6orf18    | GI_40538792-S    | rs7745906  | 6          | 31311987         | 93255                           | 6.1479                       | 0.3366                  | 6.55                       | 5.74                       | 4.68                       | 3.81                       | CEU        |
| C7orf13    | GI_14249145-S    | rs4716648  | 7          | 155948932        | 17999                           | 6.0552                       | 0.3414                  | 6.8                        | 5.54                       | 4.49                       | 3.76                       | CEU        |
| C7orf29    | GI_19923960-S    | rs10282458 | 7          | 149482950        | 15733                           | 6.7864                       | 0.3685                  | 7.26                       | 5.31                       | 4.36                       | 3.66                       | CEU        |
| C8orf13    | GI_32698772-S    | rs2736340  | 8          | 11381382         | 64837                           | 6.2147                       | 0.34                    | 6.05                       | 5.56                       | 4.52                       | 3.74                       | CEU        |
| C8orf5     | GI_33300646-S    | rs10089518 | 8          | 10877213         | 125818                          | 5.6775                       | 0.3166                  | 6.81                       | 5.57                       | 4.55                       | 3.81                       | CEU        |
| C9orf95    | GI_8923529-S     | rs10869500 | 9          | 74937249         | 23717                           | 7.5836                       | 0.4063                  | 6.25                       | 5.32                       | 4.51                       | 3.81                       | CEU        |
| CAPZA1     | GI_5453596-S     | rs7535636  | 1          | 112813841        | 112288                          | 8.0851                       | 0.4404                  | 6.19                       | 5.43                       | 4.39                       | 3.6                        | CEU        |
| CARD8      | GI_7662403-S     | rs2009373  | 19         | 53411226         | 7838                            | 11.8619                      | 0.575                   | 6.78                       | 5.69                       | 4.49                       | 3.76                       | CEU        |
| CAT        | GI_4557013-S     | rs7112624  | 11         | 34382536         | 67061                           | 9.17                         | 0.4753                  | 7.57                       | 5.64                       | 4.44                       | 3.75                       | CEU        |
| CCNB1IP1   | GI_33519439-I    | rs884368   | 14         | 19864349         | 8512                            | 7.1573                       | 0.3864                  | 6.62                       | 5.53                       | 4.52                       | 3.82                       | CEU        |
| CCNDBP1    | GI_16554567-I    | rs16957244 | 15         | 40953321         | 312288                          | 4.9555                       | 0.277                   | 6.38                       | 4.87                       | 3.85                       | 3.07                       | CEU        |
| CD151      | GI_34328914-A    | rs4075289  | 11         | 820670           | 8073                            | 8.6953                       | 0.4555                  | 7.53                       | 6.06                       | 4.82                       | 3.86                       | CEU        |
| CD79B      | GI_11038675-A    | rs3817182  | 17         | 59137640         | 222493                          | 6.1632                       | 0.3421                  | 6.46                       | 5.39                       | 4.1                        | 3.35                       | CEU        |
| CDK2AP1    | GI_17978492-S    | rs655293   | 12         | 122053285        | 217307                          | 5.5994                       | 0.3171                  | 7.15                       | 5.17                       | 4.19                       | 3.41                       | CEU        |
| CDKN1A     | GI_17978494-I    | rs733590   | 6          | 36753181         | 1450                            | 6.7874                       | 0.3685                  | 6.85                       | 5.85                       | 4.66                       | 3.82                       | CEU        |
| CGI-111    | GI_7705613-S     | rs3944133  | 5          | 128960037        | 482948                          | 5.8363                       | 0.3204                  | 6.32                       | 5.52                       | 4.35                       | 3.57                       | CEU        |
| CGI-62     | GI_7705774-S     | rs1384804  | 8          | 79734777         | 55274                           | 6.7894                       | 0.3686                  | 6.95                       | 5.44                       | 4.31                       | 3.59                       | CEU        |
| CGI-96     | GI_25092724-S    | rs4820470  | 22         | 41230802         | 2482                            | 11.2888                      | 0.5555                  | 6.63                       | 5.29                       | 4.37                       | 3.72                       | CEU        |
| CHCHD2     | GI_32307179-S    | rs845552   | 7          | 55019716         | 923871                          | 5.7968                       | 0.3184                  | 6.17                       | 5.31                       | 4.23                       | 3.54                       | CEU        |

|               |               |            |    |           |        |         |        |      |      |      |      |     |
|---------------|---------------|------------|----|-----------|--------|---------|--------|------|------|------|------|-----|
| CHI3L2        | GI_11993934-S | rs942697   | 1  | 111503545 | 5615   | 6.81    | 0.3696 | 6.99 | 5.98 | 4.82 | 3.94 | CEU |
| CHRNE         | GI_38327653-S | rs2302321  | 17 | 4728587   | 13594  | 10.4232 | 0.5243 | 9.2  | 7.05 | 5.42 | 4.3  | CEU |
| COP57A        | GI_7705329-S  | rs714774   | 12 | 6489545   | 221475 | 5.4052  | 0.2975 | 6.37 | 5.35 | 4.5  | 3.74 | CEU |
| CP110         | GI_34222317-S | rs1475963  | 16 | 19412783  | 59263  | 6.262   | 0.3424 | 6.13 | 5.37 | 4.32 | 3.58 | CEU |
| CPEB4         | GI_32698754-S | rs10516107 | 5  | 173280762 | 36825  | 10.8238 | 0.539  | 5.97 | 5.68 | 4.58 | 3.82 | CEU |
| CPNE1         | GI_23397697-A | rs6060535  | 20 | 33698936  | 21264  | 12.4017 | 0.5927 | 7.23 | 5.63 | 4.29 | 3.36 | CEU |
| CRIPT         | GI_41350204-S | rs1451156  | 2  | 46744253  | 19148  | 8.1268  | 0.4309 | 6.93 | 5.72 | 4.54 | 3.84 | CEU |
| CRNKL1        | GI_30795219-S | rs2073123  | 20 | 19978870  | 15505  | 5.7006  | 0.3133 | 7.28 | 5.53 | 4.5  | 3.73 | CEU |
| CSTB          | GI_20357564-S | rs1041456  | 21 | 44030783  | 12403  | 8.2125  | 0.4403 | 6.75 | 5.76 | 4.68 | 3.87 | CEU |
| CSTF3         | GI_4557494-S  | rs3758741  | 11 | 33063192  | 29     | 5.3589  | 0.295  | 5.85 | 5.3  | 4.38 | 3.58 | CEU |
| CTNS          | GI_4826681-S  | rs161370   | 17 | 3477002   | 34422  | 6.562   | 0.3574 | 6.7  | 5.44 | 4.54 | 3.81 | CEU |
| CTSH          | GI_23110956-A | rs1036938  | 15 | 77024302  | 22891  | 8.4809  | 0.4464 | 6.3  | 5.45 | 4.56 | 3.74 | CEU |
| CTSK          | GI_23110958-S | rs1136774  | 1  | 147551270 | 30875  | 7.2458  | 0.3906 | 6.89 | 5.43 | 4.24 | 3.45 | CEU |
| DCLRE1B       | GI_24431998-S | rs878129   | 1  | 114171237 | 2889   | 8.7891  | 0.4595 | 7.2  | 5.63 | 4.44 | 3.67 | CEU |
| DCTD          | GI_4503276-S  | rs7277     | 4  | 184186662 | 176    | 8.596   | 0.4513 | 6.89 | 5.77 | 4.65 | 3.8  | CEU |
| DERP6         | GI_44662825-I | rs4562     | 17 | 7104463   | 8022   | 8.5043  | 0.4474 | 7.01 | 5.91 | 4.56 | 3.78 | CEU |
| dJ383J4.3     | GI_42655858-S | rs3791022  | 1  | 170466426 | 34050  | 11.5215 | 0.5635 | 8.67 | 6.5  | 4.7  | 3.67 | CEU |
| DKFZP434B172  | GI_27478061-S | rs33532    | 3  | 42390209  | 682769 | 6.3567  | 0.3472 | 7.52 | 6.13 | 4.83 | 3.83 | CEU |
| DKFZp434G0522 | GI_21314674-S | rs2290019  | 16 | 86299163  | 138    | 5.7834  | 0.3177 | 6.89 | 5.51 | 4.56 | 3.83 | CEU |
| DKFZp434N035  | GI_14149994-S | rs2930761  | 22 | 18753459  | 629915 | 6.8521  | 0.3717 | 7.47 | 5.99 | 4.7  | 3.81 | CEU |
| DKFZP566H073  | GI_14149701-S | rs400688   | 17 | 4780674   | 8503   | 7.9302  | 0.4277 | 6.36 | 5.28 | 4.52 | 3.76 | CEU |
| DKFZP566J2046 | GI_13654273-S | rs404772   | 16 | 1857175   | 38461  | 6.3343  | 0.3509 | 6.2  | 5.53 | 4.44 | 3.7  | CEU |
| DKFZP586D0919 | GI_24308058-S | rs10877011 | 12 | 56411259  | 51220  | 9.3901  | 0.4903 | 6.47 | 5.38 | 4.3  | 3.57 | CEU |
| DNAJD1        | GI_7019452-S  | rs2281782  | 13 | 42496191  | 61733  | 6.4101  | 0.3548 | 7.43 | 5.55 | 4.49 | 3.7  | CEU |
| DPYSL4        | GI_11321616-S | rs12357377 | 10 | 133843968 | 25198  | 7.2903  | 0.3927 | 9.03 | 6.8  | 4.88 | 3.99 | CEU |
| DRIM          | GI_7657040-S  | rs10507131 | 12 | 100303365 | 20928  | 7.8037  | 0.4164 | 6.22 | 5.45 | 4.42 | 3.72 | CEU |
| DSCR5         | GI_24497598-A | rs1473807  | 21 | 37395043  | 33574  | 6.6351  | 0.361  | 7.74 | 5.81 | 4.64 | 3.84 | CEU |
| DTNB          | GI_37577100-A | rs1369704  | 2  | 25535241  | 23436  | 6.2312  | 0.3408 | 6.28 | 5.38 | 4.31 | 3.56 | CEU |
| ECHDC3        | GI_31542717-S | rs3829154  | 10 | 11822759  | 23045  | 8.0864  | 0.4347 | 7.41 | 5.66 | 4.61 | 3.86 | CEU |
| EIF2S1        | GI_34147492-S | rs7141519  | 14 | 66594278  | 327255 | 5.9727  | 0.3322 | 6.51 | 5.4  | 4.19 | 3.39 | CEU |
| ENTPD1        | GI_45580699-S | rs1340837  | 10 | 97532025  | 84172  | 10.7256 | 0.5354 | 6.15 | 5.38 | 4.44 | 3.69 | CEU |
| ERMAP         | GI_19923535-S | rs9960     | 1  | 42986886  | 7452   | 6.9788  | 0.3778 | 6.38 | 5.64 | 4.28 | 3.52 | CEU |
| FDX1          | GI_36054077-S | rs4576787  | 11 | 109822376 | 18049  | 6.6412  | 0.3614 | 7.06 | 5.58 | 4.32 | 3.58 | CEU |
| FLJ10252      | GI_8922312-S  | rs2377567  | 1  | 213854419 | 138031 | 5.9504  | 0.3264 | 6.26 | 5.52 | 4.53 | 3.81 | CEU |
| FLJ12994      | GI_12383091-S | rs2249090  | 15 | 54345306  | 172986 | 7.01    | 0.3793 | 7.35 | 5.74 | 4.44 | 3.61 | CEU |
| FLJ12998      | GI_12232436-S | rs7206713  | 16 | 85155545  | 33431  | 6.8225  | 0.3702 | 8.07 | 6.18 | 4.81 | 4    | CEU |
| FLJ13576      | GI_21362101-S | rs259306   | 7  | 111334509 | 665397 | 5.8824  | 0.3228 | 7.07 | 5.21 | 4.25 | 3.56 | CEU |
| FLJ14753      | GI_14211858-S | rs7025878  | 9  | 94278347  | 24096  | 8.9292  | 0.4713 | 6.11 | 5.23 | 4.22 | 3.53 | CEU |
| FLJ20257      | GI_21361790-S | rs6945952  | 7  | 99626426  | 49833  | 8.1286  | 0.4366 | 6.3  | 5.26 | 4.16 | 3.45 | CEU |
| FLJ20444      | GI_44888815-S | rs2307055  | 9  | 64205260  | 1127   | 8.1207  | 0.4306 | 5.58 | 4.12 | 2.92 | 2.12 | CEU |
| FLJ20635      | GI_8923587-S  | rs2205660  | 22 | 44052268  | 4823   | 11.061  | 0.5538 | 7.68 | 6.28 | 5.09 | 4.14 | CEU |
| FLJ20920      | GI_31542719-S | rs7627     | 17 | 45907153  | 3      | 11.5701 | 0.5652 | 6.61 | 5.61 | 4.45 | 3.76 | CEU |
| FLJ21347      | GI_31542722-S | rs8076632  | 17 | 45980927  | 7240   | 19.0726 | 0.7592 | 6.96 | 5.85 | 4.77 | 3.89 | CEU |
| FLJ21616      | GI_13375737-S | rs10088428 | 8  | 28965442  | 421    | 19.6959 | 0.7708 | 7.35 | 6.08 | 4.54 | 3.74 | CEU |
| FLJ22374      | GI_39752638-S | rs10282606 | 7  | 30608001  | 97126  | 7.2236  | 0.3895 | 7.36 | 6.01 | 4.64 | 3.8  | CEU |
| FLJ22573      | GI_13375912-S | rs2291067  | 19 | 40965374  | 43070  | 6.6199  | 0.3758 | 8.33 | 5.89 | 4.58 | 3.74 | CEU |
| FLJ22635      | GI_13376651-S | rs2242565  | 11 | 285343    | 40     | 6.5427  | 0.3565 | 6.2  | 5.2  | 4.27 | 3.49 | CEU |
| FLJ23235      | GI_13376422-S | rs2254075  | 4  | 38852749  | 61707  | 7.8981  | 0.4207 | 6.84 | 5.55 | 4.44 | 3.69 | CEU |
| FLJ34443      | GI_31341870-S | rs4130791  | 4  | 1404514   | 25127  | 7.813   | 0.4168 | 7.09 | 6.24 | 4.51 | 3.71 | CEU |
| FLJ36888      | GI_31341376-S | rs8100018  | 19 | 45443863  | 75033  | 7.0841  | 0.3829 | 8.87 | 5.67 | 4.41 | 3.66 | CEU |
| FLJ37970      | GI_40795670-S | rs612448   | 11 | 63881091  | 429    | 6.0096  | 0.3294 | 6.72 | 5.13 | 4.21 | 3.49 | CEU |
| FLJ40432      | GI_22749084-S | rs2248061  | 2  | 208320565 | 123860 | 6.8171  | 0.37   | 7.22 | 5.42 | 4.44 | 3.67 | CEU |
| FLJ46603      | GI_38348363-S | rs4789349  | 17 | 72217936  | 30427  | 18.8882 | 0.7557 | 8.15 | 6.93 | 5.1  | 4.14 | CEU |
| FLJ90036      | GI_31559781-S | rs10004179 | 4  | 121548    | 24320  | 6.7942  | 0.3689 | 6.25 | 5.18 | 4.07 | 3.27 | CEU |
| FTHFSDC1      | GI_40018634-S | rs6557112  | 6  | 151522071 | 7138   | 7.2626  | 0.3914 | 8.3  | 6.16 | 4.92 | 4.06 | CEU |
| FUT10         | GI_40805105-S | rs2304748  | 8  | 33489486  | 140780 | 5.4862  | 0.3019 | 7.62 | 5.45 | 4.22 | 3.47 | CEU |



|              |               |            |    |           |        |         |        |      |      |      |      |     |
|--------------|---------------|------------|----|-----------|--------|---------|--------|------|------|------|------|-----|
| GBP3         | GI_24308156-S | rs10922533 | 1  | 89168680  | 16511  | 13.2676 | 0.6195 | 7.53 | 5.48 | 4.41 | 3.59 | CEU |
| GSTM1        | GI_23065546-A | rs366631   | 1  | 109964514 | 20554  | 16.3427 | 0.7076 | 6.44 | 5.63 | 4.57 | 3.73 | CEU |
| GSTT1        | GI_4504184-S  | rs407257   | 22 | 22671104  | 29852  | 20.0411 | 0.7769 | 7.05 | 5.89 | 4.83 | 3.87 | CEU |
| H17          | GI_21361764-S | rs574198   | 11 | 125575051 | 78062  | 6.3916  | 0.3489 | 7.02 | 5.78 | 4.55 | 3.84 | CEU |
| HABP4        | GI_24307946-S | rs10820626 | 9  | 96283735  | 48198  | 9.6967  | 0.4965 | 6.41 | 5.4  | 4.3  | 3.56 | CEU |
| HIBCH        | GI_37594468-A | rs291427   | 2  | 191019565 | 124290 | 5.763   | 0.3166 | 6.64 | 4.96 | 4.16 | 3.5  | CEU |
| HLA-C        | GI_19557676-S | rs6457374  | 6  | 31380240  | 35519  | 7.3274  | 0.3944 | 8.12 | 5.96 | 4.68 | 3.8  | CEU |
| HLA-DOB      | GI_18641377-S | rs11244    | 6  | 32888702  | 17     | 11.3104 | 0.5562 | 7.42 | 5.52 | 4.54 | 3.74 | CEU |
| HLA-DQA1     | GI_18426974-S | rs9275141  | 6  | 32759095  | 40260  | 10.3708 | 0.5223 | 7.26 | 5.74 | 4.49 | 3.73 | CEU |
| HLA-DQA2     | GI_11095446-S | rs3793127  | 6  | 32479893  | 341140 | 14.1245 | 0.6443 | 8.24 | 5.45 | 4.37 | 3.65 | CEU |
| hmm1412      | hmm1412-S     | rs2298746  | 11 | 74231482  | 1567   | 20.546  | 0.7857 | 7.35 | 5.54 | 4.45 | 3.65 | CEU |
| hmm23621     | hmm23621-S    | rs4517848  | 17 | 20686412  | 151776 | 5.9719  | 0.3275 | 5.98 | 5.13 | 4.17 | 3.35 | CEU |
| hmm26268     | hmm26268-S    | rs3010848  | 1  | 218333518 | 2744   | 13.7999 | 0.6351 | 6.69 | 5.47 | 4.42 | 3.59 | CEU |
| hmm31752     | hmm31752-S    | rs2523871  | 6  | 31121988  | 10090  | 6.6239  | 0.3707 | 6.71 | 5.69 | 4.61 | 3.72 | CEU |
| hmm31999     | hmm31999-S    | rs4840044  | 6  | 99994734  | 14330  | 7.3131  | 0.4046 | 6.96 | 5.39 | 4.5  | 3.79 | CEU |
| hmm5445      | hmm5445-S     | rs883416   | 17 | 30594554  | 24000  | 10.1932 | 0.5156 | 7.17 | 5.68 | 4.59 | 3.73 | CEU |
| hmm665       | hmm665-S      | rs12221075 | 10 | 126524845 | 97918  | 7.0233  | 0.38   | 8.1  | 5.81 | 4.62 | 3.77 | CEU |
| hmm8232      | hmm8232-S     | rs1057533  | 1  | 46527856  | 11888  | 17.8541 | 0.7349 | 7.55 | 5.62 | 4.32 | 3.48 | CEU |
| Hs.124623    | Hs.124623-S   | rs6518350  | 21 | 44446245  | 7633   | 11.8166 | 0.5799 | 10.4 | 6.29 | 5.08 | 4.11 | CEU |
| Hs.135624    | Hs.135624-S   | rs7636818  | 3  | 180504817 | 66943  | 7.6584  | 0.4098 | 6.36 | 5.32 | 4.55 | 3.7  | CEU |
| Hs.153573    | Hs.153573-S   | rs2032942  | 7  | 133771545 | 33462  | 6.59    | 0.3588 | 7.6  | 5.8  | 4.56 | 3.68 | CEU |
| Hs.155793    | Hs.155793-S   | rs10814395 | 9  | 3650648   | 13225  | 6.5831  | 0.3585 | 8.46 | 6.17 | 4.81 | 4.07 | CEU |
| Hs.158943    | Hs.158943-S   | rs9393790  | 6  | 27222031  | 616644 | 6.4414  | 0.3721 | 5.84 | 5.11 | 4.07 | 3.33 | CEU |
| Hs.164463    | Hs.164463-S   | rs2246770  | 4  | 54397811  | 45576  | 10.7848 | 0.5376 | 9.39 | 6.76 | 5.27 | 4.15 | CEU |
| Hs.169006    | Hs.169006-S   | rs11123170 | 2  | 113695171 | 19072  | 7.4636  | 0.4008 | 6.06 | 5.18 | 4.35 | 3.59 | CEU |
| Hs.171169    | Hs.171169-S   | rs1009371  | 8  | 110567126 | 50295  | 6.2118  | 0.3398 | 8.22 | 5.97 | 4.47 | 3.6  | CEU |
| Hs.245997    | Hs.245997-S   | rs401396   | 21 | 42871651  | 7105   | 8.5498  | 0.4671 | 6.08 | 5.32 | 4.67 | 3.96 | CEU |
| Hs.26039     | Hs.26039-S    | rs7712435  | 5  | 10716402  | 6415   | 14.3226 | 0.6498 | 6.84 | 5.56 | 4.55 | 3.81 | CEU |
| Hs.264076    | Hs.264076-S   | rs1408656  | 13 | 78784655  | 111714 | 5.9636  | 0.3271 | 6.39 | 5.32 | 4.3  | 3.6  | CEU |
| Hs.311977    | Hs.311977-S   | rs11675957 | 2  | 241928782 | 175482 | 8.6489  | 0.4536 | 6.93 | 5.27 | 4.4  | 3.56 | CEU |
| Hs.333841    | Hs.333841-S   | rs9289971  | 3  | 157872649 | 119    | 6.9067  | 0.3795 | 6.09 | 5.15 | 4.31 | 3.62 | CEU |
| Hs.379903    | Hs.379903-S   | rs2286796  | 17 | 15824952  | 4262   | 9.669   | 0.5014 | 5.82 | 5.21 | 4.3  | 3.56 | CEU |
| Hs.396207    | Hs.396207-S   | rs11211152 | 1  | 45783250  | 10256  | 27.6176 | 0.8775 | 6.16 | 5.47 | 4.21 | 3.39 | CEU |
| Hs.400876    | Hs.400876-S   | rs1739652  | 20 | 36482373  | 412    | 8.7763  | 0.459  | 6.67 | 5.53 | 4.35 | 3.57 | CEU |
| Hs.40696     | Hs.40696-S    | rs761906   | 22 | 45459178  | 19369  | 6.6898  | 0.3637 | 6.91 | 5.77 | 4.65 | 3.87 | CEU |
| Hs.42805     | Hs.42805-S    | rs10751692 | 12 | 130910158 | 5      | 6.5112  | 0.3549 | 7.37 | 5.7  | 4.49 | 3.72 | CEU |
| Hs.431200    | Hs.431200-S   | rs12469091 | 2  | 200950241 | 55730  | 6.1125  | 0.3347 | 6.59 | 5.52 | 4.47 | 3.58 | CEU |
| Hs.43687     | Hs.43687-S    | rs7853349  | 9  | 97729814  | 13756  | 6.5305  | 0.3559 | 7.03 | 5.96 | 4.51 | 3.74 | CEU |
| Hs.453941    | Hs.453941-S   | rs2460970  | 8  | 119698635 | 108759 | 14.8934 | 0.6652 | 6.36 | 5.69 | 4.74 | 3.94 | CEU |
| Hs.460359    | Hs.460359-S   | rs3760106  | 16 | 23753297  | 58998  | 7.6169  | 0.4079 | 7.09 | 5.63 | 4.55 | 3.8  | CEU |
| Hs.465789    | Hs.465789-S   | rs10411185 | 19 | 8009881   | 30281  | 6.1673  | 0.3375 | 6.88 | 5.66 | 4.6  | 3.83 | CEU |
| Hs.466924    | Hs.466924-S   | rs10409138 | 19 | 50316143  | 5875   | 11.8788 | 0.5756 | 7.74 | 6.13 | 4.72 | 3.88 | CEU |
| Hs.473917    | Hs.473917-S   | rs228070   | 21 | 42833590  | 14002  | 6.4151  | 0.355  | 7.21 | 5.99 | 4.99 | 4.15 | CEU |
| Hs.482037    | Hs.482037-S   | rs6451694  | 5  | 43479504  | 71762  | 6.0046  | 0.3292 | 7.24 | 5.97 | 4.46 | 3.51 | CEU |
| Hs.485895    | Hs.485895-S   | rs6921673  | 6  | 88061477  | 64787  | 9.7679  | 0.4993 | 6.52 | 5.19 | 4.43 | 3.67 | CEU |
| Hs.490095    | Hs.490095-S   | rs7791880  | 7  | 130244703 | 435    | 8.4502  | 0.4508 | 9.34 | 7.37 | 5.67 | 4.51 | CEU |
| Hs.495422    | Hs.495422-S   | rs886090   | 9  | 133229057 | 5583   | 8.6069  | 0.4518 | 6.93 | 5.59 | 4.56 | 3.84 | CEU |
| Hs.506072    | Hs.506072-S   | rs6451535  | 5  | 40723788  | 138673 | 6.2348  | 0.341  | 6.25 | 5.15 | 4.24 | 3.56 | CEU |
| Hs.515955    | Hs.515955-S   | rs6750539  | 2  | 42949323  | 20468  | 5.8028  | 0.3187 | 6.78 | 5.4  | 4.41 | 3.68 | CEU |
| Hs.517172    | Hs.517172-S   | rs6010789  | 20 | 61031598  | 104    | 5.7759  | 0.3173 | 6.63 | 5.72 | 4.49 | 3.73 | CEU |
| Hs.519979    | Hs.519979-S   | rs2517861  | 6  | 29929961  | 75385  | 8.8025  | 0.4601 | 6.56 | 5.46 | 4.31 | 3.53 | CEU |
| Hs.6637      | Hs.6637-S     | rs1317149  | 11 | 47443461  | 140274 | 10.6293 | 0.5319 | 5.83 | 5.25 | 3.94 | 3.19 | CEU |
| HSRTSBETA    | GI_42544116-I | rs7228136  | 18 | 722017    | 19625  | 9.076   | 0.4715 | 6.5  | 5.4  | 4.53 | 3.74 | CEU |
| IFIT5        | GI_6912629-S  | rs10509571 | 10 | 91082538  | 87945  | 6.582   | 0.3584 | 6.73 | 5.83 | 4.51 | 3.76 | CEU |
| IL16         | GI_27262656-I | rs4778636  | 15 | 79378694  | 9201   | 7.0568  | 0.3816 | 7.51 | 5.43 | 4.44 | 3.73 | CEU |
| IMAGE3451454 | GI_26024192-S | rs10753434 | 1  | 223867335 | 408162 | 5.769   | 0.3169 | 6.37 | 5.26 | 4.21 | 3.47 | CEU |

|           |               |            |    |           |        |         |        |      |      |      |      |     |
|-----------|---------------|------------|----|-----------|--------|---------|--------|------|------|------|------|-----|
| IMMT      | GI_5803114-S  | rs7588325  | 2  | 86327231  | 44082  | 6.5487  | 0.3618 | 5.6  | 5.11 | 4.3  | 3.57 | CEU |
| IPP       | GI_5174472-S  | rs3811436  | 1  | 45794973  | 38862  | 5.5884  | 0.3165 | 6.5  | 5.38 | 4.18 | 3.32 | CEU |
| IRAK1BP1  | GI_27498358-S | rs9359355  | 6  | 79659533  | 4990   | 5.2975  | 0.296  | 7.09 | 5.2  | 4.43 | 3.66 | CEU |
| IREB2     | GI_41352692-S | rs2036527  | 15 | 76638670  | 60396  | 5.9633  | 0.327  | 6.64 | 5.66 | 4.57 | 3.72 | CEU |
| IRF5      | GI_38683858-A | rs6969930  | 7  | 128224264 | 41122  | 19.0053 | 0.7579 | 6.87 | 5.65 | 4.53 | 3.71 | CEU |
| KIAA0251  | GI_37541419-S | rs4985124  | 16 | 15032942  | 4530   | 6.455   | 0.3521 | 5.8  | 5.16 | 4.22 | 3.44 | CEU |
| KIAA0265  | GI_44917618-S | rs4324873  | 7  | 129355034 | 12096  | 8.2234  | 0.4351 | 6.38 | 5.36 | 4.45 | 3.72 | CEU |
| KIAA0483  | GI_7662157-S  | rs7524705  | 1  | 220645735 | 7708   | 6.8255  | 0.3704 | 6.57 | 5.31 | 4.19 | 3.45 | CEU |
| KIAA0643  | GI_13435144-S | rs8061528  | 16 | 3596483   | 69290  | 7.541   | 0.4044 | 8.83 | 5.92 | 4.59 | 3.76 | CEU |
| KIAA0748  | GI_7662281-S  | rs2171497  | 12 | 53630400  | 1979   | 8.3146  | 0.4391 | 6.26 | 5.72 | 4.43 | 3.63 | CEU |
| KIAA1271  | GI_42734342-S | rs7262903  | 20 | 3791027   | 5791   | 5.4465  | 0.2998 | 6.73 | 5.36 | 4.39 | 3.76 | CEU |
| KIAA1463  | GI_39930390-S | rs2280503  | 12 | 49424954  | 39     | 28.9628 | 0.8899 | 6.98 | 5.53 | 4.41 | 3.55 | CEU |
| KIAA1627  | GI_34147341-S | rs3775836  | 4  | 120021334 | 32126  | 5.6359  | 0.3144 | 6.78 | 5.58 | 4.26 | 3.47 | CEU |
| LCMT1     | GI_15082255-I | rs7188975  | 16 | 25044950  | 71178  | 14.7967 | 0.6626 | 7.59 | 5.77 | 4.48 | 3.8  | CEU |
| LOC132001 | GI_34147617-S | rs404171   | 3  | 11862351  | 28552  | 9.6228  | 0.5536 | 8.14 | 5.53 | 4.48 | 3.7  | CEU |
| LOC132321 | GI_27735074-S | rs2162126  | 4  | 130136681 | 254530 | 6.476   | 0.3581 | 7.49 | 5.67 | 4.27 | 3.53 | CEU |
| LOC135043 | GI_17463264-S | rs2294335  | 6  | 166726541 | 465    | 12.4357 | 0.5937 | 7.11 | 5.59 | 4.6  | 3.87 | CEU |
| LOC147804 | GI_30154892-S | rs1984432  | 19 | 58650075  | 10454  | 7.9982  | 0.4252 | 7.6  | 5.89 | 4.62 | 3.89 | CEU |
| LOC151963 | GI_31341922-S | rs9869202  | 3  | 194107892 | 110325 | 8.857   | 0.4624 | 7.24 | 5.78 | 4.6  | 3.8  | CEU |
| LOC166867 | GI_27477322-S | rs4832971  | 4  | 37776393  | 14     | 11.72   | 0.5703 | 6.65 | 5.73 | 4.6  | 3.83 | CEU |
| LOC282956 | GI_27483210-S | rs2844529  | 6  | 31461572  | 8979   | 7.6218  | 0.4081 | 6.68 | 5.56 | 4.39 | 3.67 | CEU |
| LOC283710 | GI_27483466-S | rs1060493  | 15 | 29303762  | 1273   | 5.6661  | 0.3115 | 6.32 | 5.25 | 4.27 | 3.57 | CEU |
| LOC283970 | GI_40217627-S | rs9939092  | 16 | 68596778  | 28928  | 20.7681 | 0.7894 | 6.51 | 5.56 | 4.22 | 3.4  | CEU |
| LOC284184 | GI_27500527-S | rs2255166  | 17 | 76828157  | 146    | 19.2124 | 0.7678 | 6.76 | 5.58 | 4.48 | 3.71 | CEU |
| LOC284293 | GI_27485378-S | rs8090046  | 18 | 59773066  | 1480   | 15.6321 | 0.6841 | 9.19 | 6.84 | 5.04 | 4.02 | CEU |
| LOC285407 | GI_37550539-S | rs9758051  | 3  | 131297567 | 2507   | 6.2265  | 0.3406 | 6.7  | 5.37 | 4.15 | 3.41 | CEU |
| LOC286353 | GI_27478844-S | rs7871709  | 9  | 95640165  | 8105   | 8.2418  | 0.436  | 6.22 | 5.76 | 4.45 | 3.66 | CEU |
| LOC339231 | GI_29739147-S | rs7226091  | 17 | 77247772  | 11165  | 9.9599  | 0.5067 | 7.07 | 5.53 | 4.46 | 3.71 | CEU |
| LOC339803 | GI_42656315-S | rs2060824  | 2  | 61396207  | 115207 | 5.8816  | 0.3228 | 7.8  | 5.28 | 4.32 | 3.59 | CEU |
| LOC339804 | GI_37546921-S | rs1729660  | 2  | 61277463  | 24478  | 9.2264  | 0.4776 | 6.46 | 5.22 | 4.36 | 3.57 | CEU |
| LOC340435 | GI_29735811-S | rs1493198  | 8  | 72014511  | 232584 | 14.8383 | 0.6637 | 6.36 | 5.54 | 4.48 | 3.72 | CEU |
| LOC347981 | GI_30160064-S | rs2394180  | 6  | 29913178  | 49365  | 5.5372  | 0.3046 | 6.39 | 5.35 | 4.33 | 3.53 | CEU |
| LOC348094 | GI_38176293-S | rs4238397  | 15 | 62966217  | 71597  | 17.9295 | 0.7488 | 5.42 | 4.89 | 4.09 | 3.33 | CEU |
| LOC374758 | GI_37544593-S | rs4130140  | 17 | 257873    | 6297   | 15.3049 | 0.6758 | 7.14 | 6.15 | 4.84 | 3.92 | CEU |
| LOC375097 | GI_37555934-S | rs1739652  | 20 | 36482373  | 561    | 9.0894  | 0.472  | 7.55 | 5.46 | 4.39 | 3.6  | CEU |
| LOC375165 | GI_37563669-S | rs5755542  | 22 | 33767553  | 173150 | 7.0481  | 0.3812 | 10.6 | 6.76 | 5.37 | 4.27 | CEU |
| LOC375399 | GI_37540365-S | rs1048447  | 4  | 68312238  | 103237 | 6.0242  | 0.3302 | 6.26 | 5.21 | 4.22 | 3.46 | CEU |
| LOC378075 | GI_37538916-S | rs1113765  | 7  | 55663543  | 294391 | 14.2362 | 0.6474 | 6.04 | 5.37 | 4.33 | 3.57 | CEU |
| LOC399987 | GI_42660080-S | rs9300302  | 12 | 3737732   | 1669   | 8.3153  | 0.4392 | 7.78 | 6.6  | 4.86 | 4.03 | CEU |
| LOC400051 | GI_42659981-S | rs2051993  | 12 | 66699945  | 1068   | 8.3441  | 0.4404 | 8.49 | 7.62 | 5.57 | 4.39 | CEU |
| LOC400410 | GI_42660516-S | rs2303824  | 15 | 78002652  | 8639   | 8.7319  | 0.4571 | 7.32 | 5.67 | 4.59 | 3.81 | CEU |
| LOC400566 | GI_42661283-S | rs4130140  | 17 | 257873    | 6769   | 22.2377 | 0.8125 | 7.75 | 6.26 | 4.78 | 3.84 | CEU |
| LOC400642 | GI_42661344-S | rs12352    | 18 | 5233083   | 3268   | 16.883  | 0.7138 | 7.23 | 5.35 | 4.51 | 3.8  | CEU |
| LOC400684 | GI_42661568-S | rs4805755  | 19 | 37546310  | 26656  | 6.0728  | 0.3327 | 7.06 | 5.42 | 4.34 | 3.63 | CEU |
| LOC400933 | GI_42662518-S | rs5770594  | 22 | 48339358  | 209894 | 14.6802 | 0.6595 | 7    | 5.89 | 4.82 | 4.02 | CEU |
| LOC400999 | GI_42656206-S | rs6747638  | 2  | 113138206 | 22507  | 11.2224 | 0.5595 | 7.56 | 5.77 | 4.49 | 3.64 | CEU |
| LOC401075 | GI_42656649-S | rs13093220 | 3  | 75853445  | 10487  | 5.5998  | 0.3424 | 5.83 | 5.12 | 4.2  | 3.49 | CEU |
| LOC401135 | GI_42657007-S | rs1048447  | 4  | 68312238  | 104593 | 5.9608  | 0.3269 | 6.11 | 5.17 | 4.24 | 3.46 | CEU |
| LOC401284 | GI_42657559-S | rs2294335  | 6  | 166726541 | 8502   | 10.007  | 0.5085 | 6.38 | 5.71 | 4.46 | 3.81 | CEU |
| LOC402476 | GI_42658265-S | rs4092051  | 7  | 32494319  | 80904  | 5.5341  | 0.3231 | 7.11 | 5.25 | 4.41 | 3.7  | CEU |
| LOC51240  | GI_31377759-S | rs893784   | 2  | 190361789 | 99203  | 24.5172 | 0.8435 | 6.09 | 5.31 | 4.23 | 3.48 | CEU |
| LOC90637  | GI_32698821-S | rs7809667  | 7  | 981681    | 15836  | 5.7244  | 0.3388 | 6.38 | 5.14 | 4.27 | 3.52 | CEU |
| LOC90693  | GI_40255028-S | rs11980035 | 7  | 23401773  | 54210  | 9.7067  | 0.5092 | 7.82 | 5.64 | 4.52 | 3.75 | CEU |
| LOC93349  | GI_20149710-S | rs725202   | 2  | 231079873 | 13936  | 11.5422 | 0.5642 | 6.58 | 5.54 | 4.44 | 3.73 | CEU |
| MAN1A2    | GI_40254840-S | rs1418452  | 1  | 117582420 | 195158 | 16.0068 | 0.6933 | 6.56 | 5.75 | 4.44 | 3.61 | CEU |
| MCMDC1    | GI_33469926-S | rs988098   | 6  | 119281925 | 8141   | 6.202   | 0.3393 | 6.65 | 5.23 | 4.33 | 3.57 | CEU |

|          |               |            |    |           |        |         |        |      |      |      |      |     |
|----------|---------------|------------|----|-----------|--------|---------|--------|------|------|------|------|-----|
| MGC10120 | GI_28603839-S | rs12762869 | 10 | 101983702 | 40795  | 13.4081 | 0.6236 | 6.81 | 6.15 | 4.87 | 3.87 | CEU |
| MGC12458 | GI_14150107-S | rs616540   | 1  | 241522450 | 54630  | 15.0076 | 0.6682 | 6.86 | 5.66 | 4.62 | 3.88 | CEU |
| MGC19764 | GI_42661257-S | rs883416   | 17 | 30594554  | 24027  | 10.8539 | 0.5401 | 6.35 | 5.46 | 4.42 | 3.69 | CEU |
| MGC20481 | GI_33086946-S | rs1453183  | 15 | 38650222  | 17447  | 7.789   | 0.4157 | 6.83 | 5.44 | 4.28 | 3.54 | CEU |
| MGC20781 | GI_34147471-S | rs1128966  | 17 | 37237375  | 2224   | 6.6833  | 0.3634 | 6.27 | 5.11 | 4.18 | 3.48 | CEU |
| MGC22773 | GI_21687083-S | rs1412825  | 1  | 74375835  | 17816  | 6.5448  | 0.3566 | 5.96 | 5.14 | 4.24 | 3.48 | CEU |
| MGC22960 | GI_40316917-S | rs1057533  | 1  | 46527856  | 14625  | 7.3353  | 0.3948 | 6.83 | 5.38 | 4.31 | 3.44 | CEU |
| MGC24665 | GI_24308244-S | rs243323   | 16 | 11268703  | 84214  | 8.5539  | 0.4495 | 6.95 | 5.42 | 4.4  | 3.69 | CEU |
| MGC2752  | GI_33859747-S | rs4801614  | 19 | 63788762  | 3550   | 22.8227 | 0.821  | 6.15 | 5.15 | 4.1  | 3.35 | CEU |
| MGC3794  | GI_33239373-S | rs2235207  | 1  | 164890920 | 10296  | 7.4425  | 0.3998 | 7.21 | 5.42 | 4.45 | 3.74 | CEU |
| MGC4083  | GI_14210535-S | rs4796960  | 18 | 12308027  | 8169   | 5.5838  | 0.3162 | 7.25 | 5.55 | 4.48 | 3.71 | CEU |
| MGC45416 | GI_22748848-S | rs12504699 | 4  | 48775226  | 38261  | 5.2663  | 0.29   | 6.14 | 5.17 | 3.97 | 3.19 | CEU |
| MGC9084  | GI_15553096-S | rs12143161 | 1  | 166511322 | 17800  | 6.9254  | 0.3804 | 6.77 | 5.58 | 4.44 | 3.67 | CEU |
| MK-STYX  | GI_32481212-S | rs8565     | 7  | 75274925  | 17     | 5.279   | 0.2907 | 6.4  | 5.12 | 4.1  | 3.44 | CEU |
| MMRP19   | GI_7705723-S  | rs2956077  | 11 | 34919504  | 52976  | 6.0472  | 0.3361 | 6.45 | 5.23 | 4.4  | 3.74 | CEU |
| MOCOS    | GI_8923660-S  | rs617505   | 18 | 32051949  | 50616  | 6.1732  | 0.3427 | 8.1  | 5.81 | 4.65 | 3.74 | CEU |
| MRPL21   | GI_31652223-A | rs604524   | 11 | 68386505  | 28909  | 7.6359  | 0.4087 | 6.45 | 5.71 | 4.34 | 3.62 | CEU |
| MRPL43   | GI_28872737-I | rs735137   | 10 | 102725825 | 7970   | 18.1255 | 0.7405 | 7.3  | 5.61 | 4.46 | 3.64 | CEU |
| MRPL53   | GI_22035595-S | rs12621015 | 2  | 74864843  | 253449 | 5.6224  | 0.3092 | 6.64 | 5.27 | 4.33 | 3.62 | CEU |
| MTERF    | GI_14790134-S | rs6972637  | 7  | 91251595  | 104412 | 9.7429  | 0.4983 | 6.43 | 5.59 | 4.31 | 3.59 | CEU |
| MYOM2    | GI_4505314-S  | rs2280902  | 8  | 2064479   | 16074  | 7.3664  | 0.3962 | 7.56 | 5.95 | 4.77 | 4.03 | CEU |
| NDUFS5   | GI_4758789-S  | rs10888650 | 1  | 39176254  | 15118  | 9.5608  | 0.4911 | 6.36 | 5.3  | 4.41 | 3.72 | CEU |
| NMNAT3   | GI_31342325-S | rs9822952  | 3  | 140867955 | 106092 | 11.5165 | 0.5633 | 7.38 | 6.03 | 4.58 | 3.75 | CEU |
| NUDT2    | GI_22265329-I | rs10814080 | 9  | 34216942  | 109312 | 8.6467  | 0.4535 | 6.99 | 5.56 | 4.33 | 3.57 | CEU |
| OAS1     | GI_8051622-I  | rs2285934  | 12 | 111814240 | 4018   | 8.311   | 0.439  | 9.44 | 6.96 | 5.03 | 3.95 | CEU |
| PACIN2   | GI_6005825-S  | rs1546861  | 22 | 41679665  | 89192  | 5.88    | 0.3227 | 7.32 | 5.6  | 4.49 | 3.79 | CEU |
| PASK     | GI_35038527-S | rs6437235  | 2  | 241742520 | 23448  | 6.3194  | 0.3604 | 7.55 | 5.54 | 4.47 | 3.66 | CEU |
| PBX4     | GI_15149471-S | rs10423674 | 19 | 18678903  | 854878 | 6.3257  | 0.3456 | 6.3  | 5.21 | 4.12 | 3.46 | CEU |
| PDLIM2   | GI_40288186-A | rs3735894  | 8  | 22510771  | 3117   | 5.6552  | 0.3154 | 6.93 | 5.65 | 4.51 | 3.77 | CEU |
| PEX5     | GI_37059745-S | rs3816424  | 12 | 7251496   | 3666   | 5.6886  | 0.3127 | 6.73 | 5.5  | 4.47 | 3.73 | CEU |
| PEX6     | GI_21361243-S | rs2296804  | 6  | 43039239  | 664    | 14.9901 | 0.6677 | 7.43 | 5.38 | 4.4  | 3.7  | CEU |
| PGS1     | GI_21314623-S | rs2376585  | 17 | 73929478  | 2532   | 8.1342  | 0.4312 | 7.36 | 5.9  | 4.7  | 3.95 | CEU |
| PHACS    | GI_14211920-S | rs2074038  | 11 | 44044565  | 17304  | 15.5972 | 0.6832 | 9.37 | 6.73 | 5.03 | 4.03 | CEU |
| PHC2     | GI_37595529-A | rs1998624  | 1  | 33560242  | 101670 | 12.012  | 0.5929 | 6.73 | 5.53 | 4.43 | 3.63 | CEU |
| PHEMX    | GI_37595532-A | rs937614   | 11 | 2283496   | 12377  | 5.9016  | 0.3238 | 6.52 | 5.72 | 4.52 | 3.79 | CEU |
| PIP5K1C  | GI_31317308-S | rs1476591  | 19 | 3630607   | 49262  | 8.8446  | 0.4618 | 7.21 | 5.48 | 4.52 | 3.83 | CEU |
| PIP5K2A  | GI_20302162-S | rs12768091 | 10 | 22488091  | 377874 | 6.248   | 0.3417 | 5.76 | 5.28 | 4.17 | 3.42 | CEU |
| PKHD1L1  | GI_31377831-S | rs1009371  | 8  | 110567126 | 41129  | 10.6428 | 0.5324 | 8.26 | 5.55 | 4.31 | 3.53 | CEU |
| POLR2E   | GI_14589950-S | rs6843     | 19 | 1039285   | 9      | 16.6121 | 0.7076 | 6.36 | 5.37 | 4.54 | 3.87 | CEU |
| POLR2J   | GI_21704275-S | rs4473948  | 7  | 101706117 | 1562   | 8.1919  | 0.4338 | 6.32 | 5.57 | 4.47 | 3.64 | CEU |
| PP3856   | GI_40255088-S | rs10282929 | 8  | 144752920 | 24787  | 9.9216  | 0.5052 | 6.39 | 5.63 | 4.59 | 3.71 | CEU |
| PP784    | GI_31559785-S | rs4493618  | 4  | 6819275   | 8484   | 7.3155  | 0.3939 | 7.42 | 6    | 4.63 | 3.92 | CEU |
| PPA2     | GI_31881619-A | rs11932428 | 4  | 106644740 | 3679   | 10.0827 | 0.5114 | 7.76 | 6.36 | 4.9  | 3.89 | CEU |
| PPFIA1   | GI_29171752-I | rs12295241 | 11 | 69872272  | 29712  | 6.4821  | 0.3584 | 6.8  | 5.54 | 4.62 | 3.81 | CEU |
| PPIL3    | GI_19557635-A | rs7606251  | 2  | 201562240 | 929    | 14.9112 | 0.6656 | 7.91 | 6.36 | 4.89 | 3.83 | CEU |
| PTER     | GI_20070185-S | rs1055340  | 10 | 16595534  | 974    | 11.8775 | 0.5755 | 7.07 | 5.35 | 4.45 | 3.72 | CEU |
| QRSL1    | GI_19923522-S | rs1026619  | 6  | 107221054 | 740    | 15.4883 | 0.6805 | 6.67 | 5.66 | 4.57 | 3.84 | CEU |
| R29124_1 | GI_16117774-S | rs2302188  | 19 | 46777713  | 110    | 10.6592 | 0.533  | 7.19 | 5.18 | 4.22 | 3.5  | CEU |
| RAB40B   | GI_5803162-S  | rs2254862  | 17 | 78243554  | 34648  | 5.2707  | 0.2903 | 6.75 | 5.22 | 4.17 | 3.47 | CEU |
| RAPGEFL1 | GI_7705938-S  | rs2715554  | 17 | 35742696  | 137361 | 8.1818  | 0.439  | 6.31 | 5.64 | 4.43 | 3.52 | CEU |
| RBMS2    | GI_4506448-S  | rs3782235  | 12 | 55201814  | 67204  | 5.3883  | 0.2966 | 6.04 | 5.29 | 4.27 | 3.52 | CEU |
| RDH5     | GI_4506462-S  | rs3138142  | 12 | 54401852  | 2824   | 6.7573  | 0.3722 | 5.78 | 5.24 | 4.2  | 3.49 | CEU |
| RPAP1    | GI_24430138-S | rs1867419  | 15 | 39593511  | 3379   | 6.1812  | 0.3383 | 6.27 | 5.25 | 4.22 | 3.49 | CEU |
| RPL36AL  | GI_34335143-S | rs3007033  | 14 | 49173566  | 16491  | 7.0651  | 0.382  | 6.21 | 5.46 | 4.37 | 3.61 | CEU |
| RPL8     | GI_15431305-I | rs2955194  | 8  | 145959711 | 28773  | 7.8468  | 0.4184 | 6.82 | 5.52 | 4.37 | 3.66 | CEU |
| RPLP2    | GI_16905512-S | rs4131364  | 11 | 802188    | 1887   | 5.5964  | 0.3078 | 6.45 | 5.41 | 4.39 | 3.65 | CEU |

|           |               |            |    |           |        |         |        |      |      |      |      |     |
|-----------|---------------|------------|----|-----------|--------|---------|--------|------|------|------|------|-----|
| RPS6KB2   | GI_4506738-S  | rs1476792  | 11 | 66952813  | 6532   | 8.7889  | 0.4653 | 6.47 | 5.28 | 4.09 | 3.37 | CEU |
| SARS2     | GI_20149644-S | rs10410544 | 19 | 44077372  | 20482  | 6.2798  | 0.3433 | 6.92 | 5.64 | 4.37 | 3.67 | CEU |
| SERPINB10 | GI_4826901-S  | rs6567399  | 18 | 59695526  | 57666  | 11.4522 | 0.5611 | 6.33 | 5.63 | 4.43 | 3.72 | CEU |
| SF1       | GI_42544126-I | rs693235   | 11 | 64249338  | 50961  | 14.1409 | 0.6447 | 9.37 | 6.32 | 4.83 | 3.78 | CEU |
| SH3GLB2   | GI_24431995-S | rs10988156 | 9  | 128770063 | 80074  | 5.656   | 0.3109 | 6.37 | 5.37 | 4.48 | 3.75 | CEU |
| SHMT1     | GI_22547185-I | rs941451   | 17 | 18114705  | 64948  | 5.8053  | 0.3234 | 6.37 | 5.03 | 4.15 | 3.41 | CEU |
| SIVA      | GI_11277467-I | rs3803304  | 14 | 104310191 | 17028  | 6.2521  | 0.3419 | 6.52 | 5.2  | 4.3  | 3.59 | CEU |
| SMAP-5    | GI_40255261-S | rs6875066  | 5  | 143535801 | 16027  | 5.6196  | 0.309  | 6.62 | 5.29 | 4.31 | 3.57 | CEU |
| SNAP29    | GI_18765736-S | rs853141   | 22 | 19343827  | 224644 | 5.5626  | 0.306  | 6.42 | 5.37 | 4.37 | 3.61 | CEU |
| SNX11     | GI_23111027-I | rs1452665  | 17 | 43652150  | 109054 | 7.5006  | 0.4079 | 7.54 | 5.32 | 4.36 | 3.55 | CEU |
| SPG7      | GI_40806172-I | rs8043788  | 16 | 88077063  | 54306  | 7.6816  | 0.4108 | 7.79 | 6.31 | 4.67 | 3.76 | CEU |
| SQSTM1    | GI_19923742-S | rs10277    | 5  | 179197337 | 249    | 8.5082  | 0.4475 | 6.78 | 5.67 | 4.48 | 3.78 | CEU |
| ST7L      | GI_38201636-I | rs10857963 | 1  | 112803529 | 6980   | 9.744   | 0.4983 | 7.67 | 5.58 | 4.35 | 3.67 | CEU |
| STK25     | GI_34147665-S | rs2240482  | 2  | 242125011 | 29600  | 12.6598 | 0.6205 | 6.26 | 5.26 | 4.24 | 3.52 | CEU |
| SUPT3H    | GI_4507308-A  | rs1329715  | 6  | 45017493  | 11608  | 5.8126  | 0.3385 | 7.91 | 5.72 | 4.71 | 3.82 | CEU |
| SYMPK     | GI_4759195-S  | rs2014576  | 19 | 50960916  | 50714  | 5.6609  | 0.3112 | 6.3  | 5.5  | 4.54 | 3.83 | CEU |
| SYNGR1    | GI_39777618-I | rs909685   | 22 | 38072171  | 26570  | 9.2568  | 0.4789 | 7.12 | 5.97 | 4.66 | 3.79 | CEU |
| SYNGR3    | GI_22091456-S | rs1058474  | 16 | 1988797   | 4895   | 6.6957  | 0.364  | 6.79 | 6.1  | 4.44 | 3.7  | CEU |
| TAPBP-R   | GI_34222333-S | rs2041385  | 12 | 6432554   | 9078   | 6.4355  | 0.3511 | 7.62 | 5.6  | 4.5  | 3.77 | CEU |
| TBC1D4    | GI_42660198-S | rs2297207  | 13 | 74771788  | 14413  | 7.8076  | 0.4278 | 7.43 | 5.57 | 4.57 | 3.76 | CEU |
| TEF       | GI_34486096-S | rs5996091  | 22 | 40668766  | 549034 | 8.071   | 0.4284 | 6.52 | 5.37 | 4.07 | 3.31 | CEU |
| THAP5     | GI_32698887-S | rs40915    | 7  | 107776670 | 22024  | 10.8858 | 0.5412 | 6.51 | 5.69 | 4.4  | 3.66 | CEU |
| THAP6     | GI_37059751-S | rs6841171  | 4  | 76645835  | 165244 | 6.2267  | 0.3406 | 6.94 | 5.4  | 4.38 | 3.59 | CEU |
| THOC3     | GI_14150170-S | rs4958955  | 5  | 177192735 | 50976  | 8.503   | 0.4473 | 6.91 | 5.53 | 4.42 | 3.6  | CEU |
| TIMM10    | GI_6912707-S  | rs2649662  | 11 | 57109138  | 56520  | 8.8099  | 0.4722 | 6.02 | 5.28 | 4.22 | 3.5  | CEU |
| TINP1     | GI_21359901-S | rs10515199 | 5  | 74135390  | 29871  | 7.5288  | 0.4038 | 6.7  | 5.7  | 4.41 | 3.67 | CEU |
| TMEM8     | GI_10864068-S | rs3830160  | 16 | 359093    | 3084   | 12.006  | 0.5798 | 7.1  | 5.51 | 4.33 | 3.63 | CEU |
| TMPIT     | GI_13994299-S | rs7794040  | 7  | 75265292  | 4133   | 5.6368  | 0.3099 | 7.02 | 5.41 | 4.14 | 3.39 | CEU |
| TRAPPC4   | GI_7706666-S  | rs7131534  | 11 | 118391866 | 7432   | 6.5448  | 0.3667 | 8.38 | 5.5  | 4.4  | 3.68 | CEU |
| TRIM4     | GI_15011940-A | rs2527919  | 7  | 99139164  | 5791   | 6.8293  | 0.3706 | 6.62 | 5.46 | 4.17 | 3.37 | CEU |
| TRPM7     | GI_29893551-S | rs8035534  | 15 | 48740323  | 99641  | 6.2657  | 0.3426 | 6.51 | 5.53 | 4.36 | 3.6  | CEU |
| TSGA10    | GI_41281983-I | rs4340581  | 2  | 99183543  | 32884  | 6.3801  | 0.3483 | 7.33 | 5.34 | 4.27 | 3.44 | CEU |
| TSGA2     | GI_18254455-S | rs2839533  | 21 | 42770095  | 4102   | 6.9227  | 0.3803 | 7.23 | 6.01 | 4.81 | 4.01 | CEU |
| TSSC1     | GI_4507702-S  | rs17682    | 2  | 4731323   | 20     | 5.469   | 0.301  | 6.29 | 5.44 | 4.45 | 3.73 | CEU |
| TUBB      | GI_4507728-S  | rs4305774  | 6  | 3149678   | 50583  | 8.3603  | 0.4411 | 6.44 | 5.67 | 4.54 | 3.84 | CEU |
| UBA52     | GI_15451941-S | rs2283616  | 19 | 18543495  | 3485   | 28.0428 | 0.8816 | 7.21 | 5.92 | 4.48 | 3.69 | CEU |
| UBE2G1    | GI_33359696-A | rs7212158  | 17 | 3861900   | 259212 | 5.6446  | 0.3149 | 7.59 | 5.45 | 4.52 | 3.76 | CEU |
| UGT2B11   | GI_4507822-S  | rs3100645  | 4  | 69671954  | 575169 | 13.7501 | 0.6336 | 7.16 | 5.89 | 4.37 | 3.52 | CEU |
| UGT2B17   | GI_4507820-S  | rs3100645  | 4  | 69671954  | 440125 | 13.1178 | 0.6149 | 8.06 | 5.96 | 4.34 | 3.39 | CEU |
| UGT2B7    | GI_4507824-S  | rs3100645  | 4  | 69671954  | 487102 | 12.9334 | 0.6093 | 7.48 | 5.93 | 4.27 | 3.44 | CEU |
| UROS      | GI_4557872-S  | rs7919631  | 10 | 127457290 | 9935   | 6.0083  | 0.3341 | 7    | 5.78 | 4.58 | 3.78 | CEU |
| USMG5     | GI_14249375-S | rs1163073  | 10 | 105012924 | 131111 | 23.4641 | 0.8298 | 6.16 | 5.16 | 4.27 | 3.52 | CEU |
| VPS11     | GI_17978476-S | rs1003081  | 11 | 118419203 | 38402  | 6.7946  | 0.3689 | 5.78 | 5.35 | 4.36 | 3.66 | CEU |
| WARS2     | GI_41352698-S | rs2765542  | 1  | 119272368 | 15368  | 8.0592  | 0.4279 | 7.68 | 5.56 | 4.4  | 3.61 | CEU |
| WBSCR27   | GI_30795189-S | rs8629     | 7  | 72690170  | 3632   | 14.2531 | 0.6478 | 6.75 | 5.45 | 4.16 | 3.38 | CEU |
| WVOX      | GI_18860883-I | rs6564520  | 16 | 76863720  | 6316   | 7.7879  | 0.4212 | 7.51 | 5.9  | 4.8  | 4.01 | CEU |
| XRR1A1    | GI_42659736-S | rs2298746  | 11 | 74231482  | 1489   | 16.0166 | 0.6935 | 6.62 | 5.46 | 4.36 | 3.61 | CEU |
| ZNF230    | GI_5454181-S  | rs1060880  | 19 | 49207192  | 13     | 6.5585  | 0.3573 | 6.65 | 5.41 | 4.39 | 3.68 | CEU |
| ZNF266    | GI_37622342-A | rs6512121  | 19 | 9394805   | 10465  | 11.1428 | 0.5567 | 6.42 | 5.29 | 4.42 | 3.64 | CEU |
| ZNF384    | GI_36054193-S | rs10492096 | 12 | 6450843   | 195573 | 6.7528  | 0.3668 | 6.69 | 5.58 | 4.47 | 3.72 | CEU |
| ZNF493    | GI_40255231-S | rs1781873  | 19 | 21269271  | 131483 | 6.5573  | 0.3572 | 6.44 | 5.4  | 4.04 | 3.33 | CEU |
| ZNF587    | GI_14249531-S | rs7253130  | 19 | 63065942  | 5793   | 6.6247  | 0.3605 | 7.21 | 5.41 | 4.39 | 3.59 | CEU |
| ZNF79     | GI_24307936-S | rs2243898  | 9  | 127299544 | 12379  | 6.2668  | 0.3426 | 6.59 | 5.57 | 4.4  | 3.63 | CEU |
| ZNF85     | GI_4508038-S  | rs10454111 | 19 | 20904788  | 20413  | 7.0152  | 0.3796 | 7.84 | 5.62 | 4.39 | 3.53 | CEU |
| ZRANB1    | GI_23943913-S | rs2114835  | 10 | 126620547 | 42948  | 6.449   | 0.3567 | 6.45 | 5.28 | 4.38 | 3.61 | CEU |
| 384D8-2   | GI_23097284-I | rs1008320  | 22 | 48289581  | 962243 | 6.1454  | 0.4258 | 6.82 | 5.07 | 4.18 | 3.49 | CHB |

|               |               |            |    |           |        |         |        |      |      |      |      |     |
|---------------|---------------|------------|----|-----------|--------|---------|--------|------|------|------|------|-----|
| ACN9          | GI_9910179-S  | rs6973504  | 7  | 96392135  | 62985  | 7.3078  | 0.4916 | 6.47 | 5.78 | 4.4  | 3.6  | CHB |
| AD-017        | GI_8923854-A  | rs3617     | 3  | 52808845  | 105022 | 8.6064  | 0.5564 | 6.44 | 5.34 | 4.24 | 3.49 | CHB |
| AMPD3         | GI_4502078-S  | rs3741043  | 11 | 10456571  | 28166  | 5.4351  | 0.3818 | 7.95 | 5.4  | 4.31 | 3.64 | CHB |
| ANKRD27       | GI_14149802-S | rs2868145  | 19 | 37738954  | 40999  | 5.5241  | 0.3875 | 6.91 | 5.48 | 4.47 | 3.75 | CHB |
| AP3S2         | GI_39725670-S | rs2290351  | 15 | 88175785  | 2256   | 7.1143  | 0.4811 | 6.87 | 5.39 | 4.4  | 3.69 | CHB |
| APOBEC3B      | GI_22907024-S | rs9611070  | 22 | 37720207  | 10176  | 7.6768  | 0.5109 | 7.39 | 5.95 | 4.64 | 3.82 | CHB |
| ARHGEF18      | GI_41327768-S | rs2967625  | 19 | 8204411   | 761251 | 5.5592  | 0.3897 | 6.49 | 5.55 | 4.48 | 3.77 | CHB |
| ARID1A        | GI_21264568-A | rs4466675  | 1  | 26704154  | 88227  | 5.3857  | 0.3786 | 5.92 | 5.1  | 4.15 | 3.36 | CHB |
| AXIN1         | GI_31083143-A | rs393521   | 16 | 277679    | 20     | 7.096   | 0.4801 | 7.85 | 6.31 | 4.9  | 3.81 | CHB |
| B3GTL         | GI_34996530-S | rs876540   | 13 | 30803449  | 106    | 7.695   | 0.5118 | 6.68 | 5.58 | 4.56 | 3.74 | CHB |
| B4GALT1       | GI_13929461-S | rs3780491  | 9  | 33119607  | 18689  | 9.8932  | 0.6128 | 6.5  | 5.22 | 4.42 | 3.67 | CHB |
| BARD1         | GI_4557348-S  | rs280621   | 2  | 215416088 | 2901   | 5.5205  | 0.3873 | 6.41 | 5.31 | 4.33 | 3.56 | CHB |
| BTN3A2        | GI_34932495-S | rs9379851  | 6  | 26462759  | 21356  | 7.3691  | 0.4948 | 6.56 | 5.64 | 4.48 | 3.59 | CHB |
| C10orf68      | GI_13375961-S | rs2153875  | 10 | 33230573  | 18851  | 5.5891  | 0.3916 | 6.42 | 5.48 | 4.25 | 3.53 | CHB |
| C11orf21      | GI_7662662-S  | rs2074022  | 11 | 2280617   | 6850   | 7.7403  | 0.5225 | 6.65 | 5.64 | 4.48 | 3.75 | CHB |
| C14orf130     | GI_28411949-A | rs2905     | 14 | 92763175  | 6731   | 8.9779  | 0.5735 | 7.64 | 5.37 | 4.38 | 3.7  | CHB |
| C14orf52      | GI_21553312-S | rs4902332  | 14 | 64445731  | 25025  | 23.1426 | 0.9055 | 7.8  | 6.22 | 4.73 | 3.81 | CHB |
| C1orf16       | GI_42476073-A | rs4047801  | 1  | 180146975 | 107742 | 6.0909  | 0.4226 | 6.79 | 5.12 | 4.21 | 3.48 | CHB |
| C21orf107     | GI_38026951-I | rs2836934  | 21 | 39486755  | 2428   | 15.4327 | 0.7849 | 7.92 | 6.46 | 5.21 | 4.22 | CHB |
| C6orf18       | GI_40538792-S | rs7745906  | 6  | 31311987  | 93255  | 6.5921  | 0.452  | 6.09 | 5.61 | 4.62 | 3.74 | CHB |
| C7orf13       | GI_14249145-S | rs6459698  | 7  | 155929790 | 1143   | 6.9816  | 0.4739 | 5.99 | 5.46 | 4.42 | 3.72 | CHB |
| C7orf32       | GI_42658665-S | rs7795944  | 7  | 149009114 | 6101   | 6.2549  | 0.4324 | 7.58 | 5.8  | 4.5  | 3.66 | CHB |
| C9orf88       | GI_24308286-S | rs7870985  | 9  | 127473353 | 126072 | 9.1454  | 0.581  | 10.2 | 7.09 | 5.26 | 4.05 | CHB |
| C9orf95       | GI_8923529-S  | rs2273768  | 9  | 74927820  | 14288  | 7.3872  | 0.4958 | 6.07 | 5.5  | 4.37 | 3.76 | CHB |
| CAPN12        | GI_38707980-S | rs4802770  | 19 | 43915242  | 2083   | 6.5401  | 0.449  | 6.44 | 5.64 | 4.53 | 3.72 | CHB |
| CAPZA1        | GI_5453596-S  | rs6682678  | 1  | 112918962 | 7167   | 7.6882  | 0.5115 | 6.24 | 5.36 | 4.28 | 3.51 | CHB |
| CARD8         | GI_7662403-S  | rs2015209  | 19 | 53399477  | 3911   | 6.1993  | 0.4291 | 7.2  | 5.5  | 4.37 | 3.67 | CHB |
| CCNB1IP1      | GI_33519439-I | rs884368   | 14 | 19864349  | 8512   | 6.6332  | 0.4543 | 8.16 | 5.71 | 4.67 | 3.82 | CHB |
| CCNDBP1       | GI_16554567-I | rs540587   | 15 | 41265405  | 204    | 13.3917 | 0.7328 | 6.37 | 5.35 | 4.05 | 3.22 | CHB |
| CD151         | GI_34328914-A | rs3059     | 11 | 830319    | 1576   | 6.8408  | 0.4661 | 7.86 | 5.99 | 4.63 | 3.72 | CHB |
| CDK5RAP2      | GI_28872785-S | rs872423   | 9  | 120229045 | 1793   | 11.5552 | 0.6753 | 7.14 | 6.17 | 4.79 | 3.8  | CHB |
| CEP2          | GI_21735547-S | rs2248393  | 20 | 33389517  | 173483 | 4.7243  | 0.3479 | 5.72 | 4.62 | 3.85 | 3.2  | CHB |
| CGI-49        | GI_7705766-S  | rs6689579  | 1  | 243217630 | 39314  | 6.3515  | 0.438  | 6.63 | 5.36 | 4.29 | 3.56 | CHB |
| CHCHD5        | GI_34147411-S | rs6760091  | 2  | 113093982 | 33897  | 5.8545  | 0.4082 | 6.47 | 5.21 | 4.22 | 3.51 | CHB |
| CHPT1         | GI_9910383-S  | rs10860790 | 12 | 100700197 | 80766  | 7.0788  | 0.4873 | 6.35 | 5.64 | 4.48 | 3.7  | CHB |
| CKLF          | GI_10092611-A | rs3743713  | 16 | 65140529  | 3527   | 6.3833  | 0.4399 | 7.13 | 5.53 | 4.19 | 3.44 | CHB |
| CKLFSF3       | GI_32130529-A | rs3743713  | 16 | 65140529  | 64378  | 7.2341  | 0.4876 | 6.28 | 5.34 | 4.28 | 3.48 | CHB |
| CN2           | GI_8922698-S  | rs8084058  | 18 | 70328445  | 10530  | 5.8586  | 0.4084 | 7.62 | 5.71 | 4.69 | 3.93 | CHB |
| CORO2A        | GI_34335234-A | rs2275708  | 9  | 98054873  | 88418  | 9.7024  | 0.6049 | 9.23 | 6.56 | 5.17 | 4.14 | CHB |
| CPEB4         | GI_32698754-S | rs7705502  | 5  | 173253421 | 64166  | 10.1955 | 0.625  | 10   | 6.42 | 4.86 | 3.95 | CHB |
| CPNE1         | GI_23397697-A | rs6060535  | 20 | 33698936  | 21264  | 6.4435  | 0.4593 | 6.91 | 5.25 | 4.14 | 3.31 | CHB |
| CRIPT         | GI_41350204-S | rs1451156  | 2  | 46744253  | 19148  | 6.1087  | 0.4236 | 7.01 | 5.73 | 4.6  | 3.85 | CHB |
| CRYBB2        | GI_4503062-S  | rs6519611  | 22 | 24170409  | 218080 | 37.9587 | 0.9806 | 8.09 | 6.77 | 5.24 | 4.11 | CHB |
| CSF2RB        | GI_4559407-S  | rs3817803  | 22 | 36224776  | 565673 | 6.5397  | 0.449  | 6.5  | 5.7  | 4.8  | 3.93 | CHB |
| CSTF3         | GI_4557494-S  | rs3758741  | 11 | 33063192  | 29     | 6.7496  | 0.4609 | 6.87 | 5.32 | 4.23 | 3.51 | CHB |
| DCLRE1B       | GI_24431998-S | rs10494163 | 1  | 114232754 | 64406  | 11.6873 | 0.6972 | 6.09 | 5.07 | 4.18 | 3.41 | CHB |
| DERP6         | GI_44662825-I | rs222843   | 17 | 7086705   | 9736   | 8.3669  | 0.5451 | 6.75 | 5.96 | 4.68 | 3.87 | CHB |
| DFNA5         | GI_4758153-S  | rs754553   | 7  | 24532092  | 20763  | 7.9729  | 0.5259 | 7.74 | 5.35 | 4.5  | 3.73 | CHB |
| DHX38         | GI_41406095-S | rs7198572  | 16 | 70740721  | 36718  | 9.4701  | 0.6127 | 6.79 | 5.21 | 4.14 | 3.42 | CHB |
| dJ383J4.3     | GI_42655858-S | rs7539322  | 1  | 170347622 | 152854 | 14.494  | 0.7623 | 10.3 | 6.23 | 4.69 | 3.53 | CHB |
| DKFZP566H073  | GI_14149701-S | rs238230   | 17 | 4816290   | 27113  | 5.4888  | 0.3852 | 6.31 | 5.33 | 4.36 | 3.61 | CHB |
| DKFZP566J2046 | GI_13654273-S | rs2268670  | 16 | 1811330   | 7384   | 8.4667  | 0.5499 | 6.96 | 5.9  | 4.6  | 3.76 | CHB |
| DKFZP586D0919 | GI_24308058-S | rs2069502  | 12 | 56430932  | 31547  | 6.0583  | 0.4206 | 6.04 | 5.32 | 4.35 | 3.6  | CHB |
| DTNB          | GI_37577100-A | rs6761076  | 2  | 25519409  | 7604   | 8.1355  | 0.5339 | 5.94 | 4.86 | 4.06 | 3.38 | CHB |
| EIF2S1        | GI_34147492-S | rs8004864  | 14 | 66942999  | 21466  | 7.6523  | 0.5096 | 6.52 | 5.28 | 4.18 | 3.36 | CHB |
| ELL3          | GI_13376767-S | rs689754   | 15 | 41563187  | 289222 | 6.6134  | 0.4611 | 6.9  | 4.96 | 3.81 | 3.16 | CHB |

|           |               |            |    |           |        |         |        |      |      |      |      |     |
|-----------|---------------|------------|----|-----------|--------|---------|--------|------|------|------|------|-----|
| ERAL1     | GI_24307898-S | rs9914988  | 17 | 24207230  | 4646   | 7.3416  | 0.4934 | 8.28 | 5.2  | 4    | 3.29 | CHB |
| ERCC1     | GI_42544170-A | rs2298881  | 19 | 50618756  | 8758   | 6.6394  | 0.4547 | 6.78 | 5.72 | 4.51 | 3.78 | CHB |
| EVER2     | GI_31377553-S | rs2871647  | 17 | 73649072  | 172    | 6.7109  | 0.4588 | 7.32 | 5.85 | 4.62 | 3.81 | CHB |
| F25965    | GI_28144915-S | rs3761090  | 19 | 40841290  | 95920  | 9.3736  | 0.5909 | 7.99 | 7.53 | 5.63 | 4.47 | CHB |
| FECH      | GI_4557592-S  | rs2272783  | 18 | 53389818  | 21579  | 6.4901  | 0.4461 | 6.39 | 5.59 | 4.57 | 3.81 | CHB |
| FGFR1OP   | GI_36287109-A | rs3798308  | 6  | 167391205 | 32990  | 7.1128  | 0.4811 | 6.81 | 5.86 | 4.78 | 3.94 | CHB |
| FLJ10458  | GI_20070287-S | rs3744362  | 17 | 30483209  | 632    | 7.4091  | 0.4969 | 6.24 | 5.4  | 4.47 | 3.76 | CHB |
| FLJ10781  | GI_39780596-S | rs3745787  | 19 | 51663203  | 1435   | 24.5981 | 0.9191 | 8.44 | 7.07 | 5.42 | 4.19 | CHB |
| FLJ11273  | GI_40254892-S | rs1548882  | 7  | 12059465  | 13759  | 6.0277  | 0.4263 | 6.6  | 5.82 | 4.67 | 3.87 | CHB |
| FLJ11848  | GI_13376750-S | rs1670545  | 11 | 73263760  | 52450  | 7.2233  | 0.487  | 6.57 | 5.01 | 4.15 | 3.38 | CHB |
| FLJ12442  | GI_12597652-S | rs6445534  | 3  | 52718424  | 184746 | 10.1948 | 0.6612 | 6.31 | 5.3  | 4.1  | 3.34 | CHB |
| FLJ13220  | GI_11345459-S | rs2028321  | 4  | 44377928  | 163917 | 5.6672  | 0.4358 | 6.58 | 5.29 | 4.24 | 3.46 | CHB |
| FLJ14753  | GI_14211858-S | rs9299417  | 9  | 94098937  | 203506 | 13.9588 | 0.7484 | 9.7  | 7.33 | 5.63 | 4.28 | CHB |
| FLJ20635  | GI_8923587-S  | rs104664   | 22 | 44032391  | 24700  | 13.4004 | 0.733  | 7.51 | 6.82 | 5.24 | 4.2  | CHB |
| FLJ20989  | GI_12751496-S | rs11782073 | 8  | 146271091 | 19432  | 5.2761  | 0.3715 | 6.05 | 4.81 | 3.81 | 3.06 | CHB |
| FLJ21347  | GI_31542722-S | rs1122634  | 17 | 45976364  | 11803  | 13.8454 | 0.7454 | 7.67 | 6.34 | 4.77 | 3.88 | CHB |
| FLJ22635  | GI_13376651-S | rs2242565  | 11 | 285343    | 40     | 6.1451  | 0.4258 | 6.03 | 4.79 | 3.97 | 3.28 | CHB |
| FLJ23235  | GI_13376422-S | rs2254075  | 4  | 38852749  | 61707  | 5.7592  | 0.4023 | 6.64 | 5.58 | 4.55 | 3.73 | CHB |
| FLJ32112  | GI_23308504-S | rs11206284 | 1  | 54290679  | 13575  | 7.9737  | 0.5259 | 6.6  | 5.64 | 4.57 | 3.77 | CHB |
| FLJ32191  | GI_34303923-S | rs8099987  | 19 | 42315312  | 3077   | 5.2252  | 0.3751 | 6.29 | 5.15 | 3.98 | 3.29 | CHB |
| FLJ32871  | GI_21389568-S | rs2541513  | 16 | 10668135  | 39119  | 7.048   | 0.4775 | 6.3  | 5.46 | 4.45 | 3.71 | CHB |
| FLJ46603  | GI_38348363-S | rs4789349  | 17 | 72217936  | 30427  | 22.9577 | 0.9089 | 8.12 | 6.54 | 5.15 | 4.05 | CHB |
| FLJ90036  | GI_31559781-S | rs6599293  | 4  | 123027    | 22841  | 8.5776  | 0.5551 | 8.13 | 5.59 | 4.11 | 3.3  | CHB |
| FN3KRP    | GI_20149679-S | rs2257084  | 17 | 78280764  | 1892   | 8.049   | 0.5296 | 5.86 | 4.92 | 4.05 | 3.36 | CHB |
| FN5       | GI_9910225-S  | rs7123345  | 11 | 92951521  | 100045 | 6.3641  | 0.4388 | 5.98 | 5.16 | 4.33 | 3.58 | CHB |
| FREB      | GI_42544162-S | rs1891020  | 1  | 158426112 | 10457  | 6.23    | 0.4309 | 6.87 | 5.57 | 4.46 | 3.68 | CHB |
| FTHFSDC1  | GI_40018634-S | rs6557112  | 6  | 151522071 | 7138   | 6.7922  | 0.4633 | 7.18 | 5.78 | 4.59 | 3.83 | CHB |
| GALM      | GI_20270354-S | rs752987   | 2  | 38798367  | 74450  | 5.5039  | 0.3862 | 6.97 | 5.42 | 4.34 | 3.61 | CHB |
| GBP3      | GI_24308156-S | rs10922533 | 1  | 89168680  | 16511  | 5.8938  | 0.4106 | 6.94 | 5.19 | 4.16 | 3.44 | CHB |
| GNA12     | GI_42476110-S | rs757791   | 7  | 2640537   | 96351  | 8.1282  | 0.542  | 6.13 | 5.31 | 4.39 | 3.72 | CHB |
| GNMT      | GI_24475636-S | rs2296804  | 6  | 43039239  | 150    | 5.5901  | 0.3917 | 6.55 | 5.21 | 4.32 | 3.62 | CHB |
| GSTM1     | GI_23065546-A | rs2071487  | 1  | 109945123 | 1163   | 21.5512 | 0.888  | 7.51 | 5.42 | 4.38 | 3.6  | CHB |
| GSTM2     | GI_23065549-S | rs366631   | 1  | 109964514 | 38296  | 10.3029 | 0.6292 | 6.54 | 5.4  | 4.3  | 3.58 | CHB |
| GSTT1     | GI_4504184-S  | rs407257   | 22 | 22671104  | 29852  | 27.6624 | 0.9417 | 6.07 | 5.48 | 4.48 | 3.75 | CHB |
| HEBP2     | GI_41393567-S | rs9484143  | 6  | 138726192 | 42658  | 6.0279  | 0.4188 | 7.8  | 5.41 | 4.41 | 3.7  | CHB |
| hIAN6     | GI_28416955-S | rs1916931  | 7  | 149573406 | 40519  | 5.5984  | 0.3994 | 6.33 | 5.21 | 4.35 | 3.62 | CHB |
| HIST1H4K  | GI_15718726-S | rs200501   | 6  | 27896921  | 10036  | 5.6744  | 0.397  | 5.82 | 5.27 | 4.07 | 3.3  | CHB |
| HLA-DOB   | GI_18641377-S | rs11244    | 6  | 32888702  | 17     | 6.7427  | 0.4606 | 6.95 | 5.54 | 4.43 | 3.69 | CHB |
| HLA-DQA2  | GI_11095446-S | rs6457617  | 6  | 32771829  | 49204  | 5.9119  | 0.4117 | 7.05 | 5.73 | 4.51 | 3.74 | CHB |
| HLA-F     | GI_9665231-S  | rs2394660  | 6  | 29780665  | 19526  | 5.9469  | 0.4138 | 6.66 | 5.37 | 4.33 | 3.54 | CHB |
| hmm1412   | hmm1412-S     | rs2298746  | 11 | 74231482  | 1567   | 14.6337 | 0.7658 | 6.41 | 5.43 | 4.4  | 3.52 | CHB |
| hmm14647  | hmm14647-S    | rs3117035  | 6  | 33194227  | 29     | 6.1641  | 0.427  | 6.96 | 5.65 | 4.59 | 3.85 | CHB |
| hmm26268  | hmm26268-S    | rs3003902  | 1  | 218336419 | 157    | 8.7324  | 0.5623 | 6.97 | 5.52 | 4.26 | 3.5  | CHB |
| hmm27769  | hmm27769-S    | rs10177787 | 2  | 20698916  | 19898  | 8.4977  | 0.5513 | 8.55 | 7.36 | 5.32 | 4.14 | CHB |
| hmm3151   | hmm3151-S     | rs712314   | 14 | 34478299  | 107136 | 5.824   | 0.4063 | 7.41 | 5.15 | 4.26 | 3.55 | CHB |
| hmm31585  | hmm31585-S    | rs9379687  | 6  | 24829766  | 198296 | 5.605   | 0.3926 | 5.84 | 5.05 | 4.34 | 3.71 | CHB |
| hmm31752  | hmm31752-S    | rs1265053  | 6  | 31187868  | 55790  | 9.521   | 0.5972 | 7.66 | 5.93 | 4.55 | 3.72 | CHB |
| hmm32897  | hmm32897-S    | rs12532675 | 7  | 65150964  | 498640 | 8.341   | 0.5439 | 8.81 | 6.5  | 4.71 | 3.57 | CHB |
| hmm5445   | hmm5445-S     | rs883416   | 17 | 30594554  | 24000  | 7.4156  | 0.4973 | 6.62 | 5.66 | 4.53 | 3.74 | CHB |
| hmm8932   | hmm8932-S     | rs7556492  | 1  | 157842208 | 21575  | 5.5482  | 0.389  | 6.11 | 5.12 | 4.27 | 3.62 | CHB |
| HNLF      | GI_33457307-S | rs740094   | 7  | 44442938  | 50758  | 6.8213  | 0.465  | 6.22 | 5.19 | 4.29 | 3.54 | CHB |
| HNRPL     | GI_4557644-S  | rs2278009  | 19 | 44019696  | 228    | 5.7676  | 0.4028 | 6.32 | 5.33 | 4.29 | 3.56 | CHB |
| HRI       | GI_11125767-S | rs660547   | 7  | 5879972   | 43047  | 6.6538  | 0.4555 | 6.77 | 5.44 | 4.36 | 3.61 | CHB |
| Hs.11898  | Hs.11898-S    | rs8036979  | 15 | 50735287  | 1343   | 11.6774 | 0.6794 | 6.69 | 5.83 | 4.63 | 3.81 | CHB |
| Hs.123474 | Hs.123474-S   | rs1547710  | 13 | 50899986  | 26255  | 6.456   | 0.4441 | 6.02 | 5.11 | 4.25 | 3.54 | CHB |
| Hs.124623 | Hs.124623-S   | rs7282137  | 21 | 44449095  | 4783   | 8.3609  | 0.5448 | 8.09 | 6.93 | 5.44 | 4.31 | CHB |

|           |               |            |    |           |        |         |        |      |      |      |      |     |
|-----------|---------------|------------|----|-----------|--------|---------|--------|------|------|------|------|-----|
| Hs.147006 | Hs.147006-S   | rs16832394 | 2  | 136577042 | 92683  | 18.1832 | 0.8396 | 7.47 | 6.3  | 4.67 | 3.77 | CHB |
| Hs.164463 | Hs.164463-S   | rs2246770  | 4  | 54397811  | 45576  | 8.4393  | 0.5486 | 8.17 | 6.07 | 4.77 | 3.85 | CHB |
| Hs.208685 | Hs.208685-S   | rs9468153  | 6  | 27603100  | 123921 | 6.9516  | 0.4722 | 7.47 | 5.78 | 4.44 | 3.55 | CHB |
| Hs.211939 | Hs.211939-S   | rs2480781  | 1  | 10527807  | 44697  | 6.1045  | 0.4234 | 7.17 | 5.37 | 4.37 | 3.6  | CHB |
| Hs.214235 | Hs.214235-S   | rs5743595  | 4  | 38625210  | 13169  | 6.9478  | 0.472  | 6.27 | 5.51 | 4.52 | 3.75 | CHB |
| Hs.224849 | Hs.224849-S   | rs3773491  | 3  | 14687046  | 9187   | 9.5291  | 0.5976 | 6.29 | 5.47 | 4.46 | 3.77 | CHB |
| Hs.245997 | Hs.245997-S   | rs2839556  | 21 | 42863019  | 1527   | 9.2719  | 0.5865 | 9.65 | 7.41 | 5.38 | 4.31 | CHB |
| Hs.26039  | Hs.26039-S    | rs7712435  | 5  | 10716402  | 6415   | 6.7608  | 0.4695 | 7.05 | 5.57 | 4.54 | 3.78 | CHB |
| Hs.264076 | Hs.264076-S   | rs1408656  | 13 | 78784655  | 111714 | 7.5762  | 0.5057 | 7.67 | 5.21 | 4.33 | 3.59 | CHB |
| Hs.345389 | Hs.345389-S   | rs6519611  | 22 | 24170409  | 1687   | 22.7203 | 0.9012 | 9.57 | 7.32 | 5.2  | 4.18 | CHB |
| Hs.379903 | Hs.379903-S   | rs1045599  | 17 | 15820635  | 55     | 14.3722 | 0.7592 | 8.23 | 5.93 | 4.61 | 3.72 | CHB |
| Hs.396207 | Hs.396207-S   | rs780954   | 1  | 45708170  | 64824  | 18.4989 | 0.8449 | 5.78 | 5.17 | 4.03 | 3.26 | CHB |
| Hs.400876 | Hs.400876-S   | rs805531   | 20 | 36508140  | 25355  | 9.1555  | 0.5814 | 6.47 | 5.59 | 4.39 | 3.59 | CHB |
| Hs.40696  | Hs.40696-S    | rs2295441  | 22 | 45478963  | 416    | 8.2537  | 0.5397 | 6.26 | 5.61 | 4.56 | 3.77 | CHB |
| Hs.421238 | Hs.421238-S   | rs10924924 | 1  | 243609361 | 2050   | 6.8266  | 0.4653 | 6.98 | 5.34 | 4.2  | 3.53 | CHB |
| Hs.42805  | Hs.42805-S    | rs10794424 | 12 | 130897087 | 13066  | 6.6956  | 0.4579 | 6.4  | 5.31 | 4.23 | 3.46 | CHB |
| Hs.43687  | Hs.43687-S    | rs3758250  | 9  | 97693556  | 50014  | 7.4485  | 0.499  | 7.83 | 6.05 | 4.82 | 3.93 | CHB |
| Hs.440933 | Hs.440933-S   | rs9525253  | 13 | 113871032 | 26232  | 6.0589  | 0.4206 | 8    | 5.91 | 4.6  | 3.63 | CHB |
| Hs.453941 | Hs.453941-S   | rs2514592  | 8  | 119681861 | 125533 | 14.8618 | 0.7715 | 7.01 | 5.77 | 4.72 | 3.92 | CHB |
| Hs.465789 | Hs.465789-S   | rs11670116 | 19 | 7981202   | 1602   | 10.1135 | 0.6217 | 6.42 | 5.64 | 4.52 | 3.74 | CHB |
| Hs.473917 | Hs.473917-S   | rs228048   | 21 | 42825210  | 5622   | 7.5895  | 0.5147 | 7.54 | 6.55 | 5.15 | 4.24 | CHB |
| Hs.479894 | Hs.479894-S   | rs4305590  | 4  | 70075491  | 20961  | 7.2508  | 0.4885 | 9.04 | 6.59 | 4.72 | 3.62 | CHB |
| Hs.480174 | Hs.480174-S   | rs4693155  | 4  | 88277199  | 336    | 8.0139  | 0.5364 | 8.02 | 5.65 | 4.4  | 3.6  | CHB |
| Hs.485895 | Hs.485895-S   | rs2983136  | 6  | 88084934  | 88244  | 8.6846  | 0.5687 | 6.04 | 5.36 | 4.27 | 3.55 | CHB |
| Hs.506072 | Hs.506072-S   | rs6451535  | 5  | 40723788  | 138673 | 5.0459  | 0.3632 | 7.19 | 5.04 | 4.1  | 3.45 | CHB |
| Hs.517172 | Hs.517172-S   | rs6010789  | 20 | 61031598  | 104    | 6.2914  | 0.4345 | 6.27 | 5.28 | 4.29 | 3.59 | CHB |
| Hs.54543  | Hs.54543-S    | rs344027   | 3  | 157951095 | 3082   | 7.8036  | 0.5174 | 6.24 | 5.44 | 4.36 | 3.6  | CHB |
| Hs.6637   | Hs.6637-S     | rs4752845  | 11 | 47496273  | 87462  | 14.4129 | 0.7603 | 5.41 | 4.97 | 3.91 | 3.1  | CHB |
| Hs.98028  | Hs.98028-S    | rs646521   | 11 | 124183151 | 1184   | 6.2417  | 0.4316 | 7.61 | 5.83 | 4.64 | 3.77 | CHB |
| HSRTSBETA | GI_42544116-I | rs7235957  | 18 | 707229    | 4837   | 6.2654  | 0.433  | 6.62 | 5.27 | 4.3  | 3.55 | CHB |
| IAN4L1    | GI_28416948-S | rs4725927  | 7  | 149829653 | 48477  | 7.1069  | 0.4807 | 7.15 | 6.09 | 4.84 | 3.84 | CHB |
| IL10RA    | GI_24430213-S | rs3802871  | 11 | 117281858 | 95157  | 5.5992  | 0.3922 | 6.25 | 5.54 | 4.44 | 3.7  | CHB |
| IL16      | GI_27262656-I | rs4778636  | 15 | 79378694  | 9201   | 9.5246  | 0.5974 | 6.76 | 5.53 | 4.49 | 3.73 | CHB |
| IRAK1BP1  | GI_27498358-S | rs6454082  | 6  | 79544001  | 120522 | 8.2759  | 0.5407 | 7.08 | 6.39 | 4.68 | 3.73 | CHB |
| IRF5      | GI_38683858-A | rs7807018  | 7  | 128234139 | 50997  | 12.0455 | 0.6917 | 7.16 | 5.5  | 4.33 | 3.46 | CHB |
| ITIH4     | GI_40288189-S | rs6445538  | 3  | 52849328  | 26852  | 6.2036  | 0.437  | 8.14 | 6.11 | 4.73 | 3.66 | CHB |
| IVD       | GI_6031167-S  | rs10518693 | 15 | 38487314  | 10730  | 6.4109  | 0.4415 | 6.42 | 5.33 | 4.32 | 3.57 | CHB |
| KIAA0265  | GI_44917618-S | rs12534379 | 7  | 129365068 | 2062   | 6.2532  | 0.4323 | 7.99 | 5.66 | 4.48 | 3.65 | CHB |
| KIAA1449  | GI_21314694-S | rs2056613  | 3  | 39100297  | 12379  | 5.3881  | 0.3788 | 5.81 | 5.37 | 4.39 | 3.63 | CHB |
| KIAA1463  | GI_39930390-S | rs11169520 | 12 | 49359790  | 65125  | 13.7844 | 0.7437 | 6.55 | 5.59 | 4.46 | 3.66 | CHB |
| KIAA1712  | GI_30794213-S | rs1553669  | 4  | 175612138 | 15920  | 7.8519  | 0.5198 | 6.9  | 5.92 | 4.58 | 3.74 | CHB |
| LCMT1     | GI_15082255-I | rs7188975  | 16 | 25044950  | 71178  | 18.6335 | 0.8471 | 7.29 | 5.74 | 4.42 | 3.7  | CHB |
| LGALS9    | GI_6806889-I  | rs1984547  | 17 | 22987444  | 7275   | 5.8048  | 0.4202 | 6.71 | 5.32 | 4.14 | 3.38 | CHB |
| LIPT1     | GI_21729877-I | rs12105048 | 2  | 99039323  | 191174 | 5.3698  | 0.3776 | 6.36 | 5.15 | 4.18 | 3.4  | CHB |
| LOC130502 | GI_37539459-S | rs2304588  | 2  | 20023345  | 3942   | 5.5086  | 0.3865 | 6.08 | 5.5  | 4.47 | 3.67 | CHB |
| LOC132001 | GI_34147617-S | rs404171   | 3  | 11862351  | 28552  | 6.2282  | 0.4308 | 6.79 | 5.53 | 4.41 | 3.67 | CHB |
| LOC135043 | GI_17463264-S | rs4710042  | 6  | 166722088 | 4918   | 5.9187  | 0.4121 | 6.68 | 5.77 | 4.66 | 3.87 | CHB |
| LOC144097 | GI_37541019-S | rs8995     | 11 | 63351648  | 40     | 6.3148  | 0.4359 | 6.58 | 5.62 | 4.29 | 3.53 | CHB |
| LOC151963 | GI_31341922-S | rs2133864  | 3  | 194098959 | 101392 | 6.732   | 0.46   | 7.06 | 6.02 | 4.57 | 3.75 | CHB |
| LOC197322 | GI_28372536-S | rs3751688  | 16 | 88161940  | 412367 | 9.0701  | 0.5776 | 7.7  | 6.09 | 4.49 | 3.76 | CHB |
| LOC201175 | GI_42661174-S | rs1230106  | 17 | 40843751  | 18829  | 5.7036  | 0.3988 | 7.75 | 5.57 | 4.35 | 3.49 | CHB |
| LOC206962 | GI_22046332-S | rs3812561  | 9  | 136546713 | 13328  | 10.6601 | 0.6429 | 7.28 | 5.89 | 4.71 | 3.86 | CHB |
| LOC255812 | GI_37550242-S | rs2676860  | 3  | 196147605 | 743223 | 5.7121  | 0.3993 | 7.26 | 5.69 | 4.52 | 3.69 | CHB |
| LOC282956 | GI_27483210-S | rs2428486  | 6  | 31462083  | 8468   | 11.0004 | 0.6556 | 7.28 | 5.72 | 4.58 | 3.8  | CHB |
| LOC283970 | GI_40217627-S | rs3748386  | 16 | 68532160  | 35690  | 20.3254 | 0.8724 | 11   | 7.05 | 5.04 | 3.78 | CHB |
| LOC284184 | GI_27500527-S | rs1048775  | 17 | 76816924  | 11379  | 10.395  | 0.6328 | 6.08 | 5.66 | 4.34 | 3.56 | CHB |

|           |               |            |    |           |        |         |        |      |      |      |      |     |
|-----------|---------------|------------|----|-----------|--------|---------|--------|------|------|------|------|-----|
| LOC284293 | GI_27485378-S | rs9955410  | 18 | 59771017  | 569    | 16.3646 | 0.8052 | 8.21 | 7.23 | 5.26 | 4.16 | CHB |
| LOC284345 | GI_27485260-S | rs2682551  | 19 | 48695548  | 24309  | 5.2584  | 0.3704 | 6.58 | 5.23 | 4.14 | 3.44 | CHB |
| LOC285407 | GI_37550539-S | rs9758051  | 3  | 131297567 | 2507   | 7.835   | 0.5636 | 6.78 | 5.43 | 4.25 | 3.54 | CHB |
| LOC286353 | GI_27478844-S | rs12345187 | 9  | 95747925  | 99655  | 6.8187  | 0.4648 | 7.46 | 6.22 | 4.62 | 3.72 | CHB |
| LOC339053 | GI_29746836-S | rs7187976  | 16 | 19615697  | 9726   | 7.1933  | 0.4854 | 6.46 | 5.44 | 4.44 | 3.68 | CHB |
| LOC339229 | GI_41150782-S | rs3830068  | 17 | 77233304  | 9491   | 15.2537 | 0.7808 | 8.05 | 6.22 | 4.59 | 3.77 | CHB |
| LOC339230 | GI_29739145-S | rs3088016  | 17 | 77250454  | 2      | 5.7907  | 0.4042 | 7.68 | 5.58 | 4.4  | 3.63 | CHB |
| LOC339804 | GI_37546921-S | rs12473277 | 2  | 61270271  | 31670  | 9.133   | 0.5804 | 5.66 | 5.19 | 4.22 | 3.42 | CHB |
| LOC340435 | GI_29735811-S | rs2732091  | 8  | 72080977  | 299050 | 11.2972 | 0.6749 | 11.4 | 6.97 | 5.06 | 4.01 | CHB |
| LOC346171 | GI_37552164-S | rs3095267  | 6  | 29715025  | 33484  | 7.7597  | 0.5151 | 6.38 | 5.56 | 4.38 | 3.6  | CHB |
| LOC374758 | GI_37544593-S | rs8064453  | 17 | 265835    | 1665   | 10.8492 | 0.65   | 6.96 | 5.7  | 4.33 | 3.61 | CHB |
| LOC375097 | GI_37555934-S | rs805531   | 20 | 36508140  | 25206  | 8.6818  | 0.56   | 5.87 | 5.43 | 4.4  | 3.59 | CHB |
| LOC375399 | GI_37540365-S | rs7684656  | 4  | 68318415  | 97060  | 5.7788  | 0.4035 | 6.67 | 5.15 | 4.07 | 3.33 | CHB |
| LOC378075 | GI_37538916-S | rs10232851 | 7  | 55603043  | 354891 | 17.2515 | 0.8446 | 6.48 | 5.76 | 4.47 | 3.53 | CHB |
| LOC387647 | GI_42659552-S | rs4747659  | 10 | 29797497  | 44661  | 10.6878 | 0.644  | 6.39 | 5.56 | 4.52 | 3.77 | CHB |
| LOC387834 | GI_42660007-S | rs11050615 | 12 | 9427425   | 18927  | 7.1442  | 0.4828 | 6.82 | 5.59 | 4.6  | 3.75 | CHB |
| LOC387905 | GI_41202581-S | rs7336525  | 13 | 20816844  | 20     | 7.9796  | 0.5262 | 6.87 | 5.46 | 4.36 | 3.62 | CHB |
| LOC388519 | GI_41151129-S | rs11671929 | 19 | 20222848  | 124961 | 5.6156  | 0.4005 | 6.24 | 5.08 | 4.21 | 3.42 | CHB |
| LOC389362 | GI_41147302-S | rs9328157  | 6  | 3212709   | 403    | 13.2821 | 0.7296 | 6.7  | 5.67 | 4.53 | 3.79 | CHB |
| LOC392620 | GI_41147689-S | rs2644275  | 7  | 2627251   | 92353  | 12.5045 | 0.7236 | 6.89 | 5.77 | 4.69 | 3.84 | CHB |
| LOC399987 | GI_42660080-S | rs9300302  | 12 | 3737732   | 1669   | 11.8674 | 0.6858 | 7.5  | 5.53 | 4.51 | 3.8  | CHB |
| LOC400051 | GI_42659981-S | rs2051993  | 12 | 66699945  | 1068   | 7.5493  | 0.5043 | 6.6  | 5.79 | 4.67 | 3.89 | CHB |
| LOC400410 | GI_42660516-S | rs2115539  | 15 | 77977940  | 16073  | 9.5537  | 0.5986 | 6.2  | 5.54 | 4.48 | 3.74 | CHB |
| LOC400566 | GI_42661283-S | rs8064453  | 17 | 265835    | 1193   | 11.1985 | 0.6627 | 7.86 | 5.49 | 4.5  | 3.63 | CHB |
| LOC400571 | GI_42661084-S | rs8066665  | 17 | 7426576   | 198    | 7.7559  | 0.5233 | 6.74 | 5.79 | 4.57 | 3.88 | CHB |
| LOC400642 | GI_42661344-S | rs2135308  | 18 | 5212146   | 24205  | 9.9016  | 0.6131 | 9.84 | 7.49 | 5.3  | 4.18 | CHB |
| LOC400933 | GI_42662518-S | rs739243   | 22 | 48378072  | 248608 | 14.5217 | 0.763  | 6.93 | 5.82 | 4.74 | 3.94 | CHB |
| LOC401135 | GI_42657007-S | rs10518042 | 4  | 68431669  | 14838  | 8.435   | 0.5569 | 7.86 | 6.13 | 4.36 | 3.51 | CHB |
| LOC401245 | GI_42657607-S | rs261950   | 6  | 30377540  | 10059  | 6.7818  | 0.4628 | 6.19 | 5.4  | 4.51 | 3.69 | CHB |
| LOC401560 | GI_42659039-S | rs3812561  | 9  | 136546713 | 13381  | 11.3603 | 0.6685 | 6.97 | 6.28 | 4.89 | 3.96 | CHB |
| LOC402476 | GI_42658265-S | rs2290213  | 7  | 32371870  | 203353 | 5.8387  | 0.4146 | 7.1  | 5.49 | 4.43 | 3.65 | CHB |
| LOC51240  | GI_31377759-S | rs2289226  | 2  | 190351711 | 109281 | 18.1315 | 0.8387 | 6.17 | 5.47 | 4.3  | 3.49 | CHB |
| LOC87769  | GI_34147452-S | rs9557460  | 13 | 100039757 | 57780  | 13.6238 | 0.7476 | 6.37 | 5.71 | 4.56 | 3.74 | CHB |
| LSR7      | GI_33354278-S | rs9526021  | 13 | 44416641  | 83360  | 5.8707  | 0.4092 | 6.54 | 5.37 | 4.42 | 3.68 | CHB |
| LZIC      | GI_40255081-S | rs11828    | 1  | 9921273   | 3269   | 7.7759  | 0.5159 | 6.26 | 5.55 | 4.43 | 3.68 | CHB |
| MASTL     | GI_14249561-S | rs7896781  | 10 | 27295757  | 219693 | 7.176   | 0.4845 | 6.42 | 5.09 | 4.29 | 3.62 | CHB |
| MATR3     | GI_34335242-S | rs171951   | 5  | 139352333 | 658627 | 4.8719  | 0.3447 | 5.14 | 4.74 | 4    | 3.25 | CHB |
| MBIP      | GI_7706610-S  | rs2415330  | 14 | 35812371  | 25677  | 6.3513  | 0.438  | 7.83 | 5.67 | 4.47 | 3.69 | CHB |
| MCOLN2    | GI_37540072-S | rs507465   | 1  | 85131697  | 27447  | 5.5322  | 0.388  | 5.97 | 5.29 | 4.38 | 3.59 | CHB |
| MGC10744  | GI_34101277-A | rs2518023  | 17 | 7997331   | 20306  | 8.5367  | 0.5532 | 6.82 | 5.57 | 4.6  | 3.82 | CHB |
| MGC10946  | GI_13386481-S | rs3816655  | 12 | 21613281  | 40061  | 7.2455  | 0.4882 | 8.13 | 6.76 | 5.12 | 4.06 | CHB |
| MGC11324  | GI_40255053-S | rs4693092  | 4  | 84853523  | 30210  | 6.5366  | 0.4488 | 6.38 | 5.37 | 4.39 | 3.56 | CHB |
| MGC12458  | GI_14150107-S | rs1196366  | 1  | 241505229 | 71851  | 10.8071 | 0.6485 | 6.77 | 5.7  | 4.56 | 3.81 | CHB |
| MGC14801  | GI_32261296-S | rs1055565  | 1  | 207994092 | 25     | 5.6629  | 0.3963 | 7.28 | 5.47 | 4.38 | 3.66 | CHB |
| MGC16597  | GI_42661280-S | rs3088016  | 17 | 77250454  | 1      | 6.8038  | 0.464  | 6.53 | 5.42 | 4.39 | 3.59 | CHB |
| MGC19764  | GI_42661257-S | rs883416   | 17 | 30594554  | 24027  | 7.3907  | 0.496  | 6.36 | 5.71 | 4.66 | 3.83 | CHB |
| MGC20235  | GI_21450795-S | rs8176273  | 17 | 38465179  | 261653 | 5.2545  | 0.3771 | 7.09 | 5.07 | 4.01 | 3.29 | CHB |
| MGC20781  | GI_34147471-S | rs1128966  | 17 | 37237375  | 2224   | 6.3766  | 0.4395 | 5.83 | 4.99 | 4.06 | 3.37 | CHB |
| MGC22773  | GI_21687083-S | rs1412825  | 1  | 74375835  | 17816  | 8.3845  | 0.546  | 6.25 | 5.71 | 4.23 | 3.37 | CHB |
| MGC2752   | GI_33859747-S | rs4801614  | 19 | 63788762  | 3550   | 12.0997 | 0.6935 | 6.48 | 5.28 | 4.06 | 3.24 | CHB |
| MGC3036   | GI_13027615-S | rs7781827  | 7  | 149446506 | 26132  | 6.1638  | 0.4269 | 7.65 | 5.53 | 4.43 | 3.64 | CHB |
| MGC35033  | GI_34303924-S | rs7975269  | 12 | 47130923  | 45367  | 6.1981  | 0.429  | 6.48 | 5.52 | 4.34 | 3.59 | CHB |
| MGC35308  | GI_31341688-S | rs7759603  | 6  | 166675043 | 15350  | 8.3796  | 0.5457 | 5.9  | 5.5  | 4.45 | 3.74 | CHB |
| MGC3794   | GI_33239373-S | rs7517978  | 1  | 164869703 | 31513  | 7.1383  | 0.4824 | 6.4  | 5.45 | 4.38 | 3.67 | CHB |
| MGC4083   | GI_14210535-S | rs11663340 | 18 | 12323686  | 7490   | 7.8596  | 0.5202 | 6.11 | 5.52 | 4.33 | 3.58 | CHB |
| MGC45416  | GI_22748848-S | rs12504699 | 4  | 48775226  | 38261  | 7.8965  | 0.522  | 6.55 | 5.04 | 3.91 | 3.1  | CHB |



|           |               |            |    |           |        |         |        |      |      |      |      |     |
|-----------|---------------|------------|----|-----------|--------|---------|--------|------|------|------|------|-----|
| MMRP19    | GI_7705723-S  | rs1011518  | 11 | 34967045  | 100517 | 6.9488  | 0.4885 | 7.03 | 5.5  | 4.44 | 3.7  | CHB |
| MPEG1     | GI_42659661-S | rs3847     | 11 | 58733287  | 540    | 5.1825  | 0.3654 | 6.34 | 5.18 | 4.18 | 3.44 | CHB |
| MRPL21    | GI_31652223-A | rs660614   | 11 | 68416064  | 650    | 6.6708  | 0.4644 | 6.14 | 5.48 | 4.35 | 3.6  | CHB |
| MRPL43    | GI_28872735-A | rs1056295  | 10 | 102705173 | 31436  | 16.9438 | 0.8169 | 6.44 | 5.31 | 4.27 | 3.53 | CHB |
| MTRR      | GI_4505278-A  | rs2613670  | 5  | 7974873   | 20883  | 5.9375  | 0.4133 | 6.06 | 5.78 | 4.45 | 3.67 | CHB |
| MUC20     | GI_23097330-S | rs2550240  | 3  | 196985463 | 35570  | 9.0512  | 0.5768 | 6.45 | 5.42 | 4.32 | 3.61 | CHB |
| MYBL2     | GI_31652260-S | rs4560183  | 20 | 41646027  | 132313 | 9.6085  | 0.601  | 6.35 | 5.13 | 4.4  | 3.66 | CHB |
| MYOM2     | GI_4505314-S  | rs2280902  | 8  | 2064479   | 16074  | 12.1683 | 0.6957 | 7.1  | 6.03 | 4.59 | 3.88 | CHB |
| N2N       | GI_44917616-S | rs10218795 | 1  | 142905100 | 134076 | 5.7478  | 0.4016 | 6.15 | 4.81 | 3.82 | 3.07 | CHB |
| NCKX6     | GI_39995085-S | rs3815890  | 12 | 112234656 | 34864  | 5.9475  | 0.4291 | 6.42 | 5.82 | 4.56 | 3.76 | CHB |
| NDUFA10   | GI_33519462-S | rs6732752  | 2  | 240676972 | 56521  | 5.9446  | 0.4723 | 6.32 | 5.57 | 4.51 | 3.76 | CHB |
| NDUFS5    | GI_4758789-S  | rs11205622 | 1  | 39202494  | 41358  | 7.3004  | 0.4912 | 5.91 | 5.19 | 4.33 | 3.62 | CHB |
| NIPSNAP3B | GI_21361742-S | rs2162116  | 9  | 104608968 | 6853   | 8.5517  | 0.5539 | 5.99 | 5.14 | 4.35 | 3.63 | CHB |
| NOR1      | GI_45643130-I | rs3738836  | 1  | 36554101  | 9002   | 8.8976  | 0.5699 | 7.25 | 5.47 | 4.33 | 3.6  | CHB |
| NPL4      | GI_8923608-S  | rs7222241  | 17 | 77185156  | 50514  | 10.4522 | 0.635  | 5.86 | 5.39 | 4.31 | 3.54 | CHB |
| NQO2      | GI_4505416-S  | rs4149352  | 6  | 2947237   | 14912  | 6.7826  | 0.4628 | 7.22 | 6.26 | 4.86 | 3.93 | CHB |
| NR2F6     | GI_20070198-S | rs2288541  | 19 | 17198308  | 5579   | 7.6915  | 0.52   | 8.32 | 6.07 | 4.55 | 3.76 | CHB |
| NUDT13    | GI_34330151-S | rs3998306  | 10 | 74692076  | 131148 | 6.4928  | 0.4463 | 6.37 | 5.01 | 3.92 | 3.18 | CHB |
| NUDT2     | GI_22265329-I | rs10814098 | 9  | 34314168  | 12086  | 15.4539 | 0.7854 | 6.81 | 5.59 | 4.38 | 3.55 | CHB |
| NYREN18   | GI_32483375-S | rs7807594  | 7  | 150469155 | 43834  | 5.136   | 0.3623 | 6.01 | 5.09 | 4.33 | 3.68 | CHB |
| OAS1      | GI_8051622-I  | rs2285934  | 12 | 111814240 | 4018   | 13.7884 | 0.7438 | 9.67 | 6.17 | 4.77 | 3.85 | CHB |
| PAX8      | GI_37577111-A | rs1110839  | 2  | 113710647 | 19204  | 7.0025  | 0.475  | 6.75 | 5.73 | 4.52 | 3.65 | CHB |
| PDCD4     | GI_34304340-A | rs942077   | 10 | 112585709 | 63897  | 7.4325  | 0.4982 | 6.63 | 5.66 | 4.57 | 3.71 | CHB |
| PDGFB     | GI_15451785-A | rs968451   | 22 | 37995351  | 50851  | 6.9933  | 0.4745 | 7.78 | 6.03 | 4.62 | 3.77 | CHB |
| PECI      | GI_45643118-A | rs9503936  | 6  | 4090533   | 27909  | 5.3176  | 0.3742 | 6.62 | 5.25 | 4.44 | 3.75 | CHB |
| PET112L   | GI_4758893-S  | rs2278304  | 4  | 152951014 | 1232   | 5.4722  | 0.3842 | 6.19 | 5.05 | 4.17 | 3.39 | CHB |
| PEX16     | GI_4758897-A  | rs10838530 | 11 | 45899571  | 7593   | 6.8663  | 0.4675 | 6.14 | 5.32 | 4.25 | 3.49 | CHB |
| PEX6      | GI_21361243-S | rs2296804  | 6  | 43039239  | 664    | 16.0084 | 0.7977 | 7.41 | 6.15 | 4.65 | 3.78 | CHB |
| PHACS     | GI_14211920-S | rs2074038  | 11 | 44044565  | 17304  | 19.2024 | 0.8561 | 6.17 | 5.45 | 4.37 | 3.68 | CHB |
| PHC2      | GI_37595529-A | rs10798939 | 1  | 33478530  | 19958  | 10.5943 | 0.6405 | 5.74 | 5.21 | 4.21 | 3.54 | CHB |
| PHEMX     | GI_37595532-A | rs7941928  | 11 | 2271980   | 23893  | 7.1032  | 0.4805 | 6.5  | 5.51 | 4.4  | 3.73 | CHB |
| PITPNC1   | GI_32307139-A | rs2365403  | 17 | 63126561  | 6821   | 5.5381  | 0.3884 | 6.32 | 5.44 | 4.43 | 3.66 | CHB |
| PKHD1L1   | GI_31377831-S | rs2844257  | 8  | 110590653 | 17602  | 21.4107 | 0.8863 | 6.8  | 5.47 | 4.13 | 3.39 | CHB |
| PLA2G4C   | GI_4505850-S  | rs156633   | 19 | 53319074  | 76090  | 7.7746  | 0.5243 | 7.12 | 5.88 | 4.68 | 3.77 | CHB |
| PLD2      | GI_20070140-S | rs6502844  | 17 | 4960392   | 286914 | 6.0524  | 0.4202 | 6.3  | 5.54 | 4.4  | 3.67 | CHB |
| PNN       | GI_33356173-S | rs10131369 | 14 | 38664129  | 56467  | 7.7     | 0.5121 | 8.54 | 5.73 | 4.35 | 3.56 | CHB |
| PNRC1     | GI_5802981-S  | rs1590958  | 6  | 89865656  | 14274  | 8.4176  | 0.5475 | 7.33 | 6.18 | 5.07 | 3.97 | CHB |
| POLR1A    | GI_7661685-S  | rs2241434  | 2  | 86276011  | 109272 | 5.2122  | 0.3967 | 6.43 | 5.18 | 4.26 | 3.49 | CHB |
| POLR2E    | GI_14589950-S | rs6843     | 19 | 1039285   | 9      | 17.643  | 0.8301 | 7.64 | 5.68 | 4.55 | 3.84 | CHB |
| POLR2J    | GI_21704275-S | rs2270019  | 7  | 102650959 | 943280 | 6.1055  | 0.431  | 6.34 | 5.68 | 4.17 | 3.36 | CHB |
| PP        | GI_29171760-S | rs10999176 | 10 | 71627118  | 8947   | 5.9525  | 0.4142 | 7.04 | 5.65 | 4.49 | 3.77 | CHB |
| PP3856    | GI_40255088-S | rs4874159  | 8  | 144742093 | 13960  | 12.9247 | 0.7192 | 7.16 | 5.66 | 4.43 | 3.65 | CHB |
| PPA2      | GI_31881619-A | rs924282   | 4  | 106639721 | 8698   | 13.6914 | 0.7412 | 7.01 | 5.62 | 4.32 | 3.47 | CHB |
| PPARG     | GI_20336230-A | rs12629240 | 3  | 12326574  | 124104 | 6.2565  | 0.4829 | 8.29 | 6.18 | 4.74 | 3.83 | CHB |
| PRF1      | GI_40254807-S | rs4747061  | 10 | 72009074  | 18902  | 8.8526  | 0.5678 | 8.3  | 6.83 | 5.11 | 4.17 | CHB |
| PROL4     | GI_6005801-S  | rs7316239  | 12 | 11055595  | 164644 | 5.6562  | 0.4266 | 6.55 | 5.56 | 4.47 | 3.72 | CHB |
| PTER      | GI_20070185-S | rs1055340  | 10 | 16595534  | 974    | 17.9459 | 0.8355 | 6.66 | 5.72 | 4.53 | 3.73 | CHB |
| R29124_1  | GI_16117774-S | rs714106   | 19 | 46775689  | 1914   | 10.5869 | 0.6402 | 7    | 5.22 | 4.19 | 3.45 | CHB |
| RAB15     | GI_38371738-S | rs2296323  | 14 | 64540939  | 58465  | 6.573   | 0.4509 | 5.96 | 5.51 | 4.52 | 3.73 | CHB |
| RAB24     | GI_18640747-S | rs1546363  | 5  | 176533637 | 127526 | 6.9847  | 0.4821 | 6.03 | 5.12 | 4.22 | 3.45 | CHB |
| RABGEF1   | GI_7657495-S  | rs4718398  | 7  | 65673785  | 46315  | 6.1993  | 0.4291 | 6.82 | 5.11 | 4.12 | 3.33 | CHB |
| RAD52B    | GI_31563532-S | rs4795090  | 17 | 31147710  | 121566 | 6.3993  | 0.4408 | 6.15 | 5.32 | 4.41 | 3.61 | CHB |
| raptor    | GI_22094986-S | rs1062935  | 17 | 76554452  | 37     | 6.3972  | 0.4407 | 6.32 | 5.44 | 4.34 | 3.62 | CHB |
| RBMS2     | GI_4506448-S  | rs3782235  | 12 | 55201814  | 67204  | 8.0354  | 0.529  | 5.55 | 4.94 | 4.23 | 3.48 | CHB |
| RHOBTB2   | GI_14165285-S | rs7387692  | 8  | 23312979  | 379584 | 6.8488  | 0.4665 | 6.73 | 6.14 | 4.9  | 3.92 | CHB |
| RLN1      | GI_20143931-S | rs4740810  | 9  | 5312687   | 12616  | 6.378   | 0.4474 | 7.53 | 5.62 | 4.6  | 3.83 | CHB |

|           |               |            |    |           |        |         |        |      |      |      |      |     |
|-----------|---------------|------------|----|-----------|--------|---------|--------|------|------|------|------|-----|
| RNASEH2A  | GI_38455390-S | rs1833619  | 19 | 13508830  | 723664 | 5.2776  | 0.3716 | 7    | 5.24 | 4.27 | 3.49 | CHB |
| RNGTT     | GI_4506562-S  | rs12173779 | 6  | 89717985  | 341168 | 6.3082  | 0.4355 | 5.87 | 5.47 | 4.25 | 3.56 | CHB |
| RPL12     | GI_15431291-S | rs2254622  | 9  | 127362393 | 69202  | 5.9009  | 0.411  | 6.54 | 5.27 | 4.29 | 3.62 | CHB |
| RPL37A    | GI_16306561-S | rs3732019  | 2  | 217187892 | 1196   | 17.0486 | 0.8189 | 8.18 | 6.59 | 5.2  | 4.19 | CHB |
| RPL8      | GI_15431305-I | rs2958498  | 8  | 145981621 | 6863   | 5.8694  | 0.4091 | 6.7  | 5.56 | 4.31 | 3.62 | CHB |
| RPLP2     | GI_16905512-S | rs10902222 | 11 | 800882    | 581    | 5.6428  | 0.395  | 5.97 | 5.27 | 4.18 | 3.47 | CHB |
| RPS16     | GI_34335151-S | rs1865091  | 19 | 44623906  | 5494   | 7.1231  | 0.4816 | 6.58 | 5.64 | 4.39 | 3.63 | CHB |
| RPS6KB2   | GI_4506738-S  | rs1638588  | 11 | 66956282  | 3063   | 11.0034 | 0.6557 | 7.04 | 5.88 | 4.32 | 3.45 | CHB |
| RWDD2     | GI_34222125-S | rs9444029  | 6  | 83844558  | 118256 | 6.015   | 0.418  | 7.54 | 5.29 | 4.33 | 3.51 | CHB |
| S100A13   | GI_41117409-S | rs2274739  | 1  | 150425206 | 13257  | 6.5009  | 0.4467 | 6.39 | 5.13 | 4.1  | 3.43 | CHB |
| SBZF3     | GI_31742527-S | rs2818886  | 1  | 243435449 | 408    | 5.6982  | 0.3985 | 7.37 | 5.49 | 4.29 | 3.53 | CHB |
| SCAND2    | GI_15991818-I | rs8182086  | 15 | 83142863  | 157380 | 6.6576  | 0.4557 | 6.31 | 4.95 | 4.19 | 3.46 | CHB |
| SERPINB10 | GI_4826901-S  | rs12327162 | 18 | 59731189  | 22003  | 6.1483  | 0.426  | 6.98 | 5.79 | 4.6  | 3.79 | CHB |
| SF1       | GI_42544126-I | rs477549   | 11 | 64283656  | 16643  | 11.5859 | 0.685  | 6.14 | 5.25 | 4.25 | 3.48 | CHB |
| SFXN2     | GI_34222270-S | rs2902548  | 10 | 104477372 | 11419  | 11.819  | 0.6842 | 6.13 | 5.21 | 4.05 | 3.37 | CHB |
| SIRT3     | GI_13775603-S | rs2293168  | 11 | 201482    | 4784   | 8.8889  | 0.5781 | 6.85 | 5.4  | 4.02 | 3.26 | CHB |
| SLC12A7   | GI_5730042-S  | rs4975593  | 5  | 1150281   | 46655  | 5.6519  | 0.3956 | 7.05 | 5.37 | 4.38 | 3.65 | CHB |
| SLC1A4    | GI_21314631-S | rs918060   | 2  | 65068109  | 94257  | 8.0381  | 0.5291 | 6.38 | 5.31 | 4.4  | 3.67 | CHB |
| SLC25A16  | GI_31652216-S | rs6480328  | 10 | 69794640  | 117938 | 6.5003  | 0.4467 | 6.54 | 5.41 | 4.18 | 3.4  | CHB |
| SLC26A2   | GI_4557538-S  | rs1037714  | 5  | 148933587 | 408513 | 5.4006  | 0.3796 | 6.55 | 5.32 | 4.44 | 3.73 | CHB |
| SLC27A5   | GI_13325056-S | rs893186   | 19 | 63660991  | 40813  | 5.2438  | 0.3694 | 6.1  | 5.1  | 4.09 | 3.28 | CHB |
| SLC2A8    | GI_21361448-S | rs2247310  | 9  | 127292664 | 43273  | 6.9669  | 0.4731 | 7.02 | 5.3  | 4.43 | 3.66 | CHB |
| SLC7A7    | GI_21361562-S | rs4982676  | 14 | 22347843  | 35426  | 7.7977  | 0.5171 | 5.92 | 5.44 | 4.41 | 3.72 | CHB |
| SNCA      | GI_6806897-A  | rs1372523  | 4  | 91133101  | 128310 | 6.9808  | 0.4989 | 7.55 | 5.74 | 4.49 | 3.59 | CHB |
| SPG7      | GI_40806172-I | rs3922634  | 16 | 88104267  | 27102  | 6.7982  | 0.4637 | 5.88 | 5.32 | 4.25 | 3.53 | CHB |
| SPINK2    | GI_10863910-S | rs1708768  | 4  | 57531641  | 12801  | 6.7686  | 0.462  | 7.17 | 5.87 | 4.68 | 3.86 | CHB |
| SQSTM1    | GI_19923742-S | rs748197   | 5  | 179206426 | 8840   | 6.1968  | 0.4289 | 7.22 | 5.55 | 4.48 | 3.75 | CHB |
| ST7L      | GI_38201636-I | rs7544663  | 1  | 112801048 | 4499   | 10.335  | 0.6304 | 6.63 | 5.45 | 4.29 | 3.55 | CHB |
| STAT6     | GI_23397677-S | rs841718   | 12 | 55779263  | 3670   | 8.001   | 0.5273 | 6.72 | 5.28 | 4.29 | 3.5  | CHB |
| STIM2     | GI_21070998-S | rs10022599 | 4  | 26570925  | 132029 | 6.2238  | 0.4305 | 6.52 | 5.46 | 4.38 | 3.66 | CHB |
| STK11IP   | GI_24308375-S | rs4132708  | 2  | 220876801 | 570239 | 5.5104  | 0.3866 | 6.24 | 5.41 | 4.35 | 3.67 | CHB |
| STK25     | GI_34147665-S | rs2240482  | 2  | 242125011 | 29600  | 11.9041 | 0.687  | 5.75 | 5.09 | 4.21 | 3.46 | CHB |
| SURF1     | GI_19557683-S | rs886089   | 9  | 133229020 | 19854  | 6.5265  | 0.4561 | 7.94 | 5.91 | 4.65 | 3.81 | CHB |
| TCL6      | GI_21536345-A | rs3759537  | 14 | 95204869  | 2625   | 8.1209  | 0.5332 | 6.45 | 5.9  | 4.78 | 3.93 | CHB |
| TFAM      | GI_4507400-I  | rs10826176 | 10 | 59811543  | 14230  | 8.4023  | 0.5468 | 7.18 | 5.3  | 4.16 | 3.45 | CHB |
| TGM5      | GI_4759229-A  | rs489509   | 15 | 41374199  | 61106  | 8.135   | 0.5339 | 6.39 | 4.96 | 3.94 | 3.19 | CHB |
| THAP6     | GI_37059751-S | rs7664140  | 4  | 76795815  | 15264  | 6.1827  | 0.4281 | 6.91 | 5.48 | 4.31 | 3.56 | CHB |
| TIMM10    | GI_6912707-S  | rs2649662  | 11 | 57109138  | 56520  | 8.7141  | 0.5615 | 7.05 | 5.59 | 4.35 | 3.5  | CHB |
| TK2       | GI_33636700-S | rs3743713  | 16 | 65140529  | 38282  | 8.6324  | 0.5577 | 6.67 | 5.31 | 4.29 | 3.46 | CHB |
| TLR1      | GI_41350336-S | rs10776483 | 4  | 38597606  | 23083  | 6.4975  | 0.4466 | 6.41 | 5.7  | 4.59 | 3.79 | CHB |
| TLR10     | GI_13569929-S | rs3924112  | 4  | 38618376  | 20894  | 6.8164  | 0.4647 | 6.87 | 5.6  | 4.55 | 3.8  | CHB |
| TOMM34    | GI_40807467-S | rs10485453 | 20 | 43002140  | 2254   | 9.2351  | 0.5849 | 8.72 | 6.28 | 4.8  | 3.82 | CHB |
| TRIM4     | GI_15011940-A | rs474229   | 7  | 99111209  | 22164  | 6.1815  | 0.428  | 6.41 | 5.12 | 4.06 | 3.22 | CHB |
| TSGA10    | GI_41281983-I | rs13397765 | 2  | 99007672  | 208755 | 7.8911  | 0.5218 | 6.35 | 5.5  | 4.2  | 3.4  | CHB |
| TSGA2     | GI_18254455-S | rs2839533  | 21 | 42770095  | 4102   | 8.778   | 0.573  | 6.32 | 5.76 | 4.7  | 3.99 | CHB |
| UBA52     | GI_15451941-S | rs12609505 | 19 | 18535057  | 11923  | 23.7959 | 0.9119 | 6.67 | 5.5  | 4.36 | 3.61 | CHB |
| UGT2B10   | GI_27552756-S | rs13144491 | 4  | 69273573  | 603683 | 11.6815 | 0.6796 | 7.59 | 5.5  | 4.31 | 3.37 | CHB |
| UGT2B11   | GI_4507822-S  | rs13144491 | 4  | 69273573  | 973550 | 26.528  | 0.9342 | 9.6  | 5.96 | 4.52 | 3.57 | CHB |
| UGT2B17   | GI_4507820-S  | rs13144491 | 4  | 69273573  | 41744  | 32.4933 | 0.9652 | 6.91 | 6.17 | 4.46 | 3.47 | CHB |
| UGT2B7    | GI_4507824-S  | rs13144491 | 4  | 69273573  | 885483 | 23.8972 | 0.9128 | 6.97 | 5.6  | 4.38 | 3.46 | CHB |
| UNQ2430   | GI_41190797-S | rs4264593  | 2  | 97472228  | 184269 | 5.1557  | 0.3636 | 5.68 | 5.02 | 3.86 | 3.17 | CHB |
| USMG5     | GI_14249375-S | rs11191686 | 10 | 105177736 | 33701  | 22.9002 | 0.903  | 6.51 | 5.38 | 4.2  | 3.47 | CHB |
| USP36     | GI_35250685-S | rs7207392  | 17 | 74233533  | 61740  | 7.9312  | 0.5238 | 6.79 | 5.59 | 4.55 | 3.75 | CHB |
| UTS2      | GI_12056480-I | rs161826   | 1  | 7914604   | 67277  | 10.2159 | 0.6345 | 7.7  | 6.04 | 4.65 | 3.68 | CHB |
| VAMP1     | GI_40549443-I | rs2532498  | 12 | 6433959   | 8201   | 5.5133  | 0.394  | 6.94 | 5.47 | 4.52 | 3.77 | CHB |
| VPS13A    | GI_15619007-I | rs10491839 | 9  | 77270451  | 41099  | 7.0453  | 0.4774 | 7.03 | 5.7  | 4.69 | 3.85 | CHB |

|           |               |            |    |           |        |         |        |      |      |      |      |     |
|-----------|---------------|------------|----|-----------|--------|---------|--------|------|------|------|------|-----|
| WBSCR27   | GI_30795189-S | rs6946037  | 7  | 72681366  | 12436  | 12.9675 | 0.7205 | 5.89 | 5.09 | 4.02 | 3.33 | CHB |
| WDR4      | GI_40217837-I | rs9980962  | 21 | 43101964  | 34453  | 5.821   | 0.4061 | 6.88 | 5.69 | 4.57 | 3.87 | CHB |
| XRR1A1    | GI_42659736-S | rs2298746  | 11 | 74231482  | 1489   | 11.3774 | 0.6691 | 6.16 | 5.3  | 4.25 | 3.55 | CHB |
| ZNF213    | GI_32698677-S | rs170381   | 16 | 3144728   | 12225  | 6.1681  | 0.4272 | 6.91 | 5.22 | 4.34 | 3.63 | CHB |
| ZNF230    | GI_5454181-S  | rs12753    | 19 | 49207354  | 175    | 6.2905  | 0.4422 | 7.38 | 5.63 | 4.39 | 3.61 | CHB |
| ZNF253    | GI_10567821-S | rs1019280  | 19 | 19908429  | 43815  | 5.915   | 0.4193 | 5.69 | 4.99 | 4.13 | 3.42 | CHB |
| ZNF257    | GI_15627000-S | rs4932932  | 19 | 21995054  | 69220  | 6.2917  | 0.4422 | 6.67 | 5.4  | 4.12 | 3.37 | CHB |
| ZNF266    | GI_37622342-A | rs6512130  | 19 | 9407351   | 23011  | 7.7446  | 0.5143 | 6.22 | 5.18 | 4.31 | 3.6  | CHB |
| ZNF281    | GI_40255235-S | rs1339575  | 1  | 197081822 | 25986  | 5.864   | 0.4088 | 6.5  | 5.66 | 4.35 | 3.65 | CHB |
| ZNF37A    | GI_37551348-S | rs2505192  | 10 | 38435029  | 12496  | 5.2025  | 0.3667 | 7.4  | 4.72 | 3.81 | 2.99 | CHB |
| ZNF587    | GI_14249531-S | rs7245531  | 19 | 63080519  | 8784   | 6.8436  | 0.4742 | 6.87 | 5.27 | 4.26 | 3.53 | CHB |
| ABCD2     | GI_21536379-S | rs11172259 | 12 | 38156087  | 76842  | 6.3565  | 0.4541 | 6.26 | 5.44 | 4.43 | 3.65 | JPT |
| ABCF2     | GI_27881505-I | rs13240743 | 7  | 151004562 | 657064 | 6.0989  | 0.4306 | 7.38 | 5.4  | 4.5  | 3.67 | JPT |
| ACN9      | GI_9910179-S  | rs6973504  | 7  | 96392135  | 62985  | 6.6934  | 0.4657 | 6.58 | 5.39 | 4.34 | 3.59 | JPT |
| ACY1L2    | GI_37551403-S | rs693932   | 6  | 89887093  | 41475  | 6.0229  | 0.426  | 7.61 | 5.13 | 4.4  | 3.58 | JPT |
| AK2       | GI_26665888-I | rs11581013 | 1  | 33122811  | 21556  | 5.5532  | 0.3965 | 8.08 | 5.5  | 4.37 | 3.63 | JPT |
| AKAP7     | GI_20336197-A | rs9372991  | 6  | 131493747 | 152338 | 6.0061  | 0.425  | 8    | 5.89 | 4.63 | 3.74 | JPT |
| ALDH8A1   | GI_25952151-A | rs3817776  | 6  | 135298449 | 17995  | 6.6954  | 0.4658 | 6.02 | 5.51 | 4.41 | 3.62 | JPT |
| ALS2CR4   | GI_22748830-S | rs2241135  | 2  | 202332738 | 16411  | 6.9005  | 0.4774 | 6.76 | 5.43 | 4.25 | 3.46 | JPT |
| ANXA2     | GI_4757755-S  | rs4878501  | 9  | 32699876  | 915237 | 5.6992  | 0.4058 | 6.53 | 5.37 | 4.31 | 3.61 | JPT |
| APOBEC3B  | GI_22907024-S | rs2142833  | 22 | 37716796  | 6765   | 7.0796  | 0.4874 | 8.16 | 6.67 | 4.91 | 3.88 | JPT |
| ASXL1     | GI_29570781-S | rs6088133  | 20 | 31238740  | 748120 | 5.067   | 0.3646 | 6.2  | 4.92 | 4.02 | 3.31 | JPT |
| ATP6V1C1  | GI_19913430-S | rs1018088  | 8  | 104162535 | 12355  | 6.2159  | 0.4377 | 7.01 | 5.52 | 4.4  | 3.6  | JPT |
| ATPIF1    | GI_30260191-I | rs2938867  | 1  | 28199434  | 48942  | 6.2433  | 0.4393 | 6.79 | 5.2  | 3.95 | 3.23 | JPT |
| B3GALT3   | GI_15451873-I | rs6772723  | 3  | 162377776 | 93267  | 7.0392  | 0.4851 | 6.71 | 5.43 | 4.28 | 3.44 | JPT |
| B3GTL     | GI_34996530-S | rs912603   | 13 | 30803641  | 86     | 8.1259  | 0.5507 | 7.41 | 6.15 | 4.59 | 3.81 | JPT |
| B4GALT1   | GI_13929461-S | rs3780480  | 9  | 33153486  | 52568  | 7.8358  | 0.5274 | 6.07 | 5.45 | 4.37 | 3.66 | JPT |
| B7        | GI_42542401-A | rs2239163  | 12 | 6884337   | 9270   | 10.6999 | 0.6532 | 7.38 | 5.64 | 4.53 | 3.76 | JPT |
| BCAS1     | GI_4502372-S  | rs290431   | 20 | 52109454  | 115356 | 6.0383  | 0.4429 | 5.96 | 5.34 | 4.37 | 3.65 | JPT |
| BM039     | GI_39725678-S | rs3743503  | 16 | 79613942  | 2583   | 6.9985  | 0.4829 | 7.79 | 5.64 | 4.57 | 3.8  | JPT |
| BTN3A2    | GI_34932495-S | rs9379851  | 6  | 26462759  | 21356  | 10.2297 | 0.6351 | 8.52 | 6.63 | 5.28 | 4.13 | JPT |
| C10orf32  | GI_21389380-S | rs10509758 | 10 | 104671700 | 67558  | 5.5059  | 0.4087 | 6.1  | 5.11 | 4.14 | 3.4  | JPT |
| C10orf68  | GI_13375961-S | rs2997515  | 10 | 32770832  | 440890 | 8.3141  | 0.5511 | 6.78 | 5.46 | 4.3  | 3.54 | JPT |
| C10orf88  | GI_13376420-S | rs2153669  | 10 | 124599273 | 81862  | 5.8536  | 0.4155 | 6.42 | 5.58 | 4.52 | 3.72 | JPT |
| C11orf21  | GI_7662662-S  | rs2074021  | 11 | 2280104   | 6337   | 7.5144  | 0.5108 | 7.38 | 5.54 | 4.47 | 3.72 | JPT |
| C14orf124 | GI_9910257-S  | rs1956921  | 14 | 24049256  | 70173  | 5.9715  | 0.4228 | 6.12 | 5.63 | 4.43 | 3.68 | JPT |
| C14orf130 | GI_28411949-A | rs2905     | 14 | 92763175  | 6731   | 6.854   | 0.4668 | 6.54 | 5.4  | 4.52 | 3.74 | JPT |
| C14orf52  | GI_21553312-S | rs4902345  | 14 | 64473657  | 2901   | 18.7363 | 0.8488 | 7.81 | 6.46 | 4.99 | 3.95 | JPT |
| C1QTNF3   | GI_13569918-I | rs6546     | 5  | 34055787  | 28     | 7.1033  | 0.4887 | 6.97 | 5.78 | 4.51 | 3.76 | JPT |
| C21orf107 | GI_38026951-I | rs8128118  | 21 | 39514099  | 29772  | 18.6786 | 0.8478 | 7.26 | 5.83 | 4.93 | 4.18 | JPT |
| C22orf2   | GI_21359898-S | rs138695   | 22 | 37444738  | 50631  | 9.6244  | 0.6103 | 6.48 | 5.45 | 4.35 | 3.61 | JPT |
| C6orf33   | GI_19115959-S | rs2268732  | 6  | 52504461  | 124100 | 7.4487  | 0.5073 | 7.91 | 6.55 | 4.89 | 3.85 | JPT |
| C9orf102  | GI_39930392-S | rs690495   | 9  | 95735348  | 120944 | 5.7353  | 0.4081 | 5.94 | 5.31 | 4.3  | 3.54 | JPT |
| CAPZA1    | GI_5453596-S  | rs3790611  | 1  | 112779834 | 146295 | 9.052   | 0.5855 | 6.22 | 5.38 | 4.28 | 3.48 | JPT |
| CBS       | GI_4557414-S  | rs719038   | 21 | 43344013  | 2473   | 5.4949  | 0.3856 | 6.54 | 5.46 | 4.76 | 4.06 | JPT |
| CCNB1IP1  | GI_33519439-I | rs2318864  | 14 | 19837458  | 18379  | 7.3007  | 0.4994 | 6.95 | 5.65 | 4.51 | 3.72 | JPT |
| CCNDBP1   | GI_16554567-I | rs2899077  | 15 | 41297317  | 31708  | 8.2981  | 0.5591 | 7.03 | 5.36 | 3.92 | 3.15 | JPT |
| CD151     | GI_34328914-A | rs3059     | 11 | 830319    | 1576   | 6.0547  | 0.4279 | 7.53 | 5.88 | 4.39 | 3.61 | JPT |
| CDK5RAP2  | GI_28872785-S | rs872423   | 9  | 120229045 | 1793   | 10.779  | 0.6561 | 6.08 | 5.24 | 4.22 | 3.5  | JPT |
| CHKL      | GI_23238259-I | rs2073604  | 22 | 49299069  | 8510   | 5.8441  | 0.4149 | 7.05 | 5.41 | 4.26 | 3.54 | JPT |
| CHPT1     | GI_9910383-S  | rs2695281  | 12 | 100592467 | 26964  | 5.8978  | 0.4183 | 6.05 | 5.57 | 4.46 | 3.67 | JPT |
| CIAO1     | GI_38570089-S | rs3731930  | 2  | 96388535  | 29668  | 5.8746  | 0.4094 | 6.59 | 4.98 | 3.92 | 3.16 | JPT |
| CLECSF2   | GI_37577106-S | rs1597097  | 12 | 9911534   | 15079  | 7.8487  | 0.528  | 9.03 | 5.81 | 4.49 | 3.71 | JPT |
| COG4      | GI_21070955-A | rs8049475  | 16 | 69187810  | 115681 | 5.4733  | 0.3914 | 6.26 | 5.15 | 4.01 | 3.25 | JPT |
| CPA4      | GI_10047105-S | rs3807344  | 7  | 129528170 | 29489  | 5.9365  | 0.4365 | 6.69 | 5.88 | 4.5  | 3.67 | JPT |
| CPEB4     | GI_32698754-S | rs7705502  | 5  | 173253421 | 64166  | 7.378   | 0.5035 | 9.54 | 7.23 | 5.42 | 4.28 | JPT |

|               |               |            |    |           |        |         |        |      |      |      |      |     |
|---------------|---------------|------------|----|-----------|--------|---------|--------|------|------|------|------|-----|
| CPNE1         | GI_23397697-A | rs12481545 | 20 | 33871112  | 193440 | 7.9225  | 0.5233 | 7.04 | 5.56 | 4.23 | 3.33 | JPT |
| CRIPT         | GI_41350204-S | rs1531133  | 2  | 46755282  | 8119   | 9.3713  | 0.6085 | 6.83 | 5.79 | 4.6  | 3.86 | JPT |
| CRYBB2        | GI_4503062-S  | rs6519611  | 22 | 24170409  | 218080 | 34.7248 | 0.9749 | 11   | 7.93 | 5.59 | 4.37 | JPT |
| CSTF3         | GI_4557494-S  | rs3758741  | 11 | 33063192  | 29     | 6.1667  | 0.4347 | 6.2  | 5.22 | 4.25 | 3.53 | JPT |
| CTNS          | GI_4826681-S  | rs4790530  | 17 | 3502173   | 9251   | 6.4605  | 0.4522 | 6.58 | 5.57 | 4.36 | 3.67 | JPT |
| CTSH          | GI_23110956-A | rs10400902 | 15 | 77018671  | 17260  | 6.1294  | 0.4325 | 6.56 | 5.82 | 4.62 | 3.79 | JPT |
| CTSS          | GI_23110961-S | rs12085336 | 1  | 147588853 | 72867  | 6.5389  | 0.4489 | 7.82 | 4.92 | 4.11 | 3.26 | JPT |
| DAPK3         | GI_4557510-S  | rs2278438  | 19 | 3915106   | 5361   | 6.3831  | 0.4477 | 6.2  | 5.49 | 4.47 | 3.78 | JPT |
| DC6           | GI_34222364-S | rs10496660 | 2  | 127629274 | 911896 | 5.2     | 0.3735 | 6.25 | 5.15 | 4.25 | 3.51 | JPT |
| DCLRE1B       | GI_24431998-S | rs10108    | 1  | 114228372 | 60024  | 7.0556  | 0.4861 | 6.59 | 5.43 | 4.13 | 3.4  | JPT |
| DDX17         | GI_38201709-I | rs138465   | 22 | 37232349  | 17146  | 8.248   | 0.5479 | 7.35 | 6.37 | 4.79 | 3.85 | JPT |
| DERP6         | GI_44662825-I | rs222843   | 17 | 7086705   | 9736   | 13.2917 | 0.7383 | 7.2  | 5.66 | 4.59 | 3.81 | JPT |
| DGCR6L        | GI_15718677-S | rs752689   | 22 | 18683947  | 7569   | 6.0993  | 0.4307 | 6.84 | 5.8  | 4.51 | 3.83 | JPT |
| DHX30         | GI_20336291-A | rs11713693 | 3  | 47049910  | 816266 | 6.4862  | 0.4878 | 6.04 | 4.93 | 3.92 | 3.06 | JPT |
| dJ383J4.3     | GI_42655858-S | rs7539322  | 1  | 170347622 | 152854 | 9.0633  | 0.586  | 8.21 | 7.03 | 5.25 | 3.89 | JPT |
| DKFZp434H247  | GI_37552078-S | rs1057745  | 19 | 44580230  | 174    | 7.3286  | 0.5009 | 6.7  | 5.48 | 4.32 | 3.58 | JPT |
| DKFZP566H073  | GI_14149701-S | rs238245   | 17 | 4788188   | 989    | 9.6541  | 0.6116 | 6.85 | 5.78 | 4.47 | 3.71 | JPT |
| DKFZP586D0919 | GI_24308058-S | rs1021469  | 12 | 56494431  | 31952  | 7.0009  | 0.483  | 6.64 | 5.48 | 4.32 | 3.51 | JPT |
| DNASE1L3      | GI_4826697-S  | rs9845458  | 3  | 58150400  | 8243   | 7.5072  | 0.5104 | 6.83 | 4.87 | 3.94 | 3.23 | JPT |
| DPYSL4        | GI_11321616-S | rs2637654  | 10 | 133828801 | 40365  | 6.4398  | 0.451  | 7.88 | 6.16 | 4.67 | 3.82 | JPT |
| DSCR5         | GI_24497594-I | rs2249828  | 21 | 37354491  | 11851  | 6.1003  | 0.4307 | 7.04 | 5.91 | 4.9  | 4.02 | JPT |
| DTNB          | GI_37577100-A | rs6731296  | 2  | 25546478  | 34673  | 6.2469  | 0.4396 | 6.35 | 5.39 | 4.13 | 3.34 | JPT |
| EGFL5         | GI_42659252-S | rs7861226  | 9  | 120430675 | 12379  | 6.2798  | 0.4415 | 6.5  | 5.62 | 4.29 | 3.53 | JPT |
| EIF2S1        | GI_34147492-S | rs1045060  | 14 | 66875006  | 46527  | 10.6868 | 0.6616 | 6.31 | 4.87 | 3.92 | 3.26 | JPT |
| ENDOG         | GI_4758269-S  | rs2759009  | 9  | 128678562 | 14090  | 5.9502  | 0.4293 | 6.64 | 5.61 | 4.58 | 3.86 | JPT |
| ESRRBL1       | GI_19923513-S | rs162064   | 3  | 109306751 | 55652  | 6.2462  | 0.4395 | 6.25 | 5.4  | 4.15 | 3.42 | JPT |
| F25965        | GI_28144915-S | rs3787052  | 19 | 40893895  | 43315  | 13.6821 | 0.7492 | 7.3  | 6.17 | 4.79 | 3.88 | JPT |
| FECH          | GI_4557592-S  | rs317807   | 18 | 53401668  | 33429  | 6.2785  | 0.4415 | 6.76 | 5.75 | 4.6  | 3.79 | JPT |
| FGFR1OP       | GI_36287109-A | rs3798308  | 6  | 167391205 | 32990  | 10.8915 | 0.6603 | 10.2 | 7.97 | 5.94 | 4.7  | JPT |
| FLJ10204      | GI_8922280-S  | rs13272492 | 8  | 124505250 | 17874  | 5.7692  | 0.4103 | 6.41 | 5.56 | 4.45 | 3.76 | JPT |
| FLJ10458      | GI_20070287-S | rs3744362  | 17 | 30483209  | 632    | 11.9591 | 0.6975 | 7.03 | 5.67 | 4.56 | 3.82 | JPT |
| FLJ10781      | GI_39780596-S | rs12609521 | 19 | 51658767  | 3001   | 33.2418 | 0.9705 | 9.4  | 7.1  | 5.48 | 4.24 | JPT |
| FLJ11848      | GI_13376750-S | rs12366033 | 11 | 73056622  | 259588 | 6.2221  | 0.4381 | 6.34 | 5.39 | 4.18 | 3.41 | JPT |
| FLJ13615      | GI_13376688-S | rs3990713  | 12 | 87503410  | 495358 | 5.9346  | 0.4283 | 6.21 | 5.25 | 4.07 | 3.32 | JPT |
| FLJ14146      | GI_31542689-S | rs437078   | 1  | 217257022 | 3579   | 9.0958  | 0.5874 | 6.76 | 5.29 | 4.35 | 3.6  | JPT |
| FLJ14753      | GI_14211858-S | rs7859571  | 9  | 94211440  | 91003  | 7.9629  | 0.5338 | 7.16 | 5.91 | 4.48 | 3.62 | JPT |
| FLJ20580      | GI_8923540-S  | rs7549319  | 1  | 53369588  | 22442  | 5.387   | 0.3858 | 5.77 | 5.2  | 4.18 | 3.5  | JPT |
| FLJ20605      | GI_31542712-S | rs437078   | 1  | 217257022 | 88648  | 6.158   | 0.4342 | 6.1  | 5.45 | 4.31 | 3.59 | JPT |
| FLJ20635      | GI_8923587-S  | rs104664   | 22 | 44032391  | 24700  | 11.9373 | 0.6968 | 8.17 | 6.33 | 5.06 | 4.14 | JPT |
| FLJ21347      | GI_31542722-S | rs1122634  | 17 | 45976364  | 11803  | 7.0815  | 0.4875 | 6.91 | 5.63 | 4.39 | 3.67 | JPT |
| FLJ22175      | GI_19923616-S | rs3924327  | 17 | 77128811  | 11372  | 6.5945  | 0.46   | 6.78 | 5.63 | 4.4  | 3.59 | JPT |
| FLJ22635      | GI_13376651-S | rs2242565  | 11 | 285343    | 40     | 11.929  | 0.6965 | 7.06 | 5.13 | 4    | 3.25 | JPT |
| FLJ22729      | GI_13375953-S | rs999797   | 17 | 26183455  | 67079  | 5.9343  | 0.4283 | 5.87 | 5.1  | 4.05 | 3.3  | JPT |
| FLJ23235      | GI_13376422-S | rs2254075  | 4  | 38852749  | 61707  | 9.4225  | 0.6017 | 6.67 | 5.33 | 4.33 | 3.67 | JPT |
| FLJ23403      | GI_13384601-S | rs264200   | 18 | 10953991  | 293003 | 6.0443  | 0.4516 | 7.05 | 5.52 | 4.45 | 3.75 | JPT |
| FLJ31438      | GI_22748824-S | rs2576722  | 2  | 55373474  | 58929  | 6.266   | 0.4407 | 6.37 | 5.56 | 4.43 | 3.65 | JPT |
| FLJ32871      | GI_21389568-S | rs2719695  | 16 | 10671946  | 42930  | 5.3945  | 0.3863 | 6.19 | 5.31 | 4.44 | 3.68 | JPT |
| FLJ35036      | GI_37550554-S | rs4683404  | 3  | 142643069 | 4056   | 6.294   | 0.4424 | 6.27 | 5.26 | 4.28 | 3.54 | JPT |
| FLJ36175      | GI_22749102-S | rs7114156  | 2  | 159966575 | 48444  | 7.5285  | 0.5115 | 7.28 | 5.38 | 4.46 | 3.59 | JPT |
| FLJ38984      | GI_22748804-S | rs2074676  | 1  | 35696804  | 152026 | 5.6782  | 0.4045 | 6.19 | 5.43 | 4.15 | 3.37 | JPT |
| FLJ40113      | GI_38016132-S | rs867370   | 15 | 80225317  | 290337 | 5.3086  | 0.3807 | 6.37 | 5    | 4.1  | 3.34 | JPT |
| FLJ46603      | GI_38348363-S | rs4789349  | 17 | 72217936  | 30427  | 25.9917 | 0.9389 | 7.98 | 6.29 | 4.95 | 3.99 | JPT |
| FLJ90036      | GI_31559781-S | rs2006748  | 4  | 77113     | 68755  | 6.5024  | 0.4547 | 5.65 | 4.9  | 3.9  | 3.23 | JPT |
| FN3KRP        | GI_20149679-S | rs2243523  | 17 | 78273738  | 5134   | 6.4552  | 0.4519 | 6.24 | 5.13 | 4.15 | 3.35 | JPT |
| FTSJ3         | GI_17017990-S | rs716880   | 17 | 59256554  | 5722   | 5.7843  | 0.4038 | 6.93 | 4.9  | 3.88 | 3.22 | JPT |
| G0S2          | GI_20070269-S | rs2896936  | 1  | 205249867 | 988044 | 5.6982  | 0.4058 | 6.94 | 5.47 | 4.4  | 3.72 | JPT |

|           |               |            |    |           |        |         |        |      |      |      |      |     |
|-----------|---------------|------------|----|-----------|--------|---------|--------|------|------|------|------|-----|
| GALNT4    | GI_34452724-S | rs1492911  | 12 | 88331039  | 86945  | 5.4341  | 0.3889 | 6.39 | 5.27 | 4.2  | 3.52 | JPT |
| GBP3      | GI_24308156-S | rs10493821 | 1  | 89187156  | 1965   | 8.5583  | 0.5628 | 6.38 | 5.52 | 4.43 | 3.62 | JPT |
| GPNMB     | GI_4505404-S  | rs1468593  | 7  | 22953372  | 134214 | 6.2952  | 0.4587 | 6.56 | 5.38 | 4.42 | 3.64 | JPT |
| GSTM1     | GI_23065546-A | rs2014578  | 1  | 109953413 | 9453   | 29.4598 | 0.9553 | 6.8  | 5.5  | 4.36 | 3.62 | JPT |
| GSTM2     | GI_23065549-S | rs2071487  | 1  | 109945123 | 18905  | 7.8299  | 0.5271 | 7.16 | 5.44 | 4.39 | 3.62 | JPT |
| GSTM4     | GI_23065559-A | rs12745189 | 1  | 109898605 | 14939  | 5.5678  | 0.3975 | 6.53 | 5.37 | 4.48 | 3.64 | JPT |
| GSTP1     | GI_6552334-S  | rs687316   | 11 | 67063408  | 46804  | 6.6899  | 0.4655 | 6.48 | 5.09 | 4.16 | 3.35 | JPT |
| GSTT1     | GI_4504184-S  | rs5760147  | 22 | 22659502  | 41454  | 23.8865 | 0.9177 | 6.31 | 5.72 | 4.55 | 3.76 | JPT |
| GYPE      | GI_38373678-A | rs2292362  | 4  | 144804124 | 351457 | 5.3685  | 0.3919 | 6.5  | 5.04 | 4.01 | 3.28 | JPT |
| HEBP2     | GI_41393567-S | rs2076273  | 6  | 138745333 | 23517  | 9.6363  | 0.6108 | 7.42 | 5.8  | 4.66 | 3.81 | JPT |
| HEMK      | GI_7705408-S  | rs9875961  | 3  | 50853126  | 255882 | 4.8575  | 0.4048 | 6.06 | 4.77 | 3.95 | 3.11 | JPT |
| HLA-DQA1  | GI_18426974-S | rs6457617  | 6  | 32771829  | 52994  | 6.7897  | 0.4794 | 9.09 | 6.65 | 5.05 | 3.89 | JPT |
| HLA-DQB1  | GI_24797068-S | rs465506   | 6  | 33466986  | 731136 | 5.7475  | 0.4089 | 6.35 | 5.45 | 4.41 | 3.63 | JPT |
| hmm1412   | hmm1412-S     | rs2298746  | 11 | 74231482  | 1567   | 19.2657 | 0.8636 | 6.32 | 5.45 | 4.45 | 3.6  | JPT |
| hmm14470  | hmm14470-S    | rs3812105  | 6  | 25212233  | 19510  | 6.3502  | 0.4457 | 9.11 | 5.83 | 4.55 | 3.78 | JPT |
| hmm26268  | hmm26268-S    | rs3003902  | 1  | 218336419 | 157    | 9.3205  | 0.5973 | 9.04 | 6.2  | 4.8  | 3.75 | JPT |
| hmm2656   | hmm2656-S     | rs1617132  | 12 | 125781577 | 25835  | 12.9466 | 0.7283 | 10.5 | 8.09 | 6.08 | 4.68 | JPT |
| hmm28069  | hmm28069-S    | rs6733550  | 2  | 85739672  | 8101   | 7.7354  | 0.5223 | 6.43 | 5.14 | 4.23 | 3.46 | JPT |
| hmm30172  | hmm30172-S    | rs6817520  | 4  | 119678315 | 36660  | 6.144   | 0.4334 | 6.55 | 5.39 | 4.37 | 3.61 | JPT |
| hmm31752  | hmm31752-S    | rs2535310  | 6  | 31161236  | 29158  | 13.6009 | 0.7639 | 6.54 | 5.31 | 4.34 | 3.65 | JPT |
| hmm32897  | hmm32897-S    | rs12537368 | 7  | 65343800  | 305804 | 7.7699  | 0.5156 | 6.72 | 5.29 | 4.11 | 3.27 | JPT |
| hmm5445   | hmm5445-S     | rs883416   | 17 | 30594554  | 24000  | 8.8456  | 0.5761 | 6.51 | 5.28 | 4.51 | 3.69 | JPT |
| hmm8932   | hmm8932-S     | rs1556259  | 1  | 157827722 | 7089   | 5.5555  | 0.3967 | 6.07 | 5.25 | 4.44 | 3.68 | JPT |
| HRI       | GI_11125767-S | rs511969   | 7  | 5857551   | 20626  | 6.2486  | 0.4397 | 6.01 | 5.17 | 4.26 | 3.61 | JPT |
| Hs.11898  | Hs.11898-S    | rs8036979  | 15 | 50735287  | 1343   | 8.9307  | 0.58   | 7.11 | 5.26 | 4.43 | 3.7  | JPT |
| Hs.128024 | Hs.128024-S   | rs2160195  | 7  | 38178211  | 13021  | 6.1858  | 0.452  | 7.75 | 5.45 | 4.45 | 3.71 | JPT |
| Hs.147006 | Hs.147006-S   | rs16832394 | 2  | 136577042 | 92683  | 14.6723 | 0.7748 | 8.92 | 7.05 | 5.13 | 3.94 | JPT |
| Hs.164463 | Hs.164463-S   | rs2246770  | 4  | 54397811  | 45576  | 7.2623  | 0.5058 | 9.43 | 7.06 | 5.05 | 4.04 | JPT |
| Hs.214235 | Hs.214235-S   | rs5743595  | 4  | 38625210  | 13169  | 6.5792  | 0.4591 | 6.13 | 5.38 | 4.48 | 3.72 | JPT |
| Hs.224849 | Hs.224849-S   | rs2053017  | 3  | 14677276  | 18957  | 6.5442  | 0.4571 | 7.26 | 5.76 | 4.47 | 3.69 | JPT |
| Hs.245997 | Hs.245997-S   | rs1788414  | 21 | 42878403  | 13857  | 9.2473  | 0.5854 | 8.89 | 7.29 | 5.83 | 4.76 | JPT |
| Hs.264076 | Hs.264076-S   | rs1408656  | 13 | 78784655  | 111714 | 8.492   | 0.5596 | 7.01 | 5.27 | 4.36 | 3.59 | JPT |
| Hs.345389 | Hs.345389-S   | rs6519611  | 22 | 24170409  | 1687   | 19.6164 | 0.8687 | 7.97 | 6.83 | 5.36 | 4.28 | JPT |
| Hs.36679  | Hs.36679-S    | rs3848289  | 16 | 65564339  | 82143  | 5.4293  | 0.3885 | 6.02 | 5.22 | 4.09 | 3.33 | JPT |
| Hs.379903 | Hs.379903-S   | rs1045599  | 17 | 15820635  | 55     | 13.85   | 0.7621 | 6.84 | 5.53 | 4.43 | 3.61 | JPT |
| Hs.396207 | Hs.396207-S   | rs11211152 | 1  | 45783250  | 10256  | 22.6726 | 0.906  | 7.69 | 5.72 | 4.39 | 3.42 | JPT |
| Hs.397369 | Hs.397369-S   | rs12912    | 7  | 100334220 | 1659   | 6.0891  | 0.43   | 6.2  | 5.34 | 4.15 | 3.47 | JPT |
| Hs.400876 | Hs.400876-S   | rs805531   | 20 | 36508140  | 25355  | 7.6859  | 0.5197 | 6.22 | 5.38 | 4.32 | 3.51 | JPT |
| Hs.402723 | Hs.402723-S   | rs4879852  | 9  | 35001305  | 59485  | 9.592   | 0.609  | 6.18 | 5.25 | 4.2  | 3.51 | JPT |
| Hs.453941 | Hs.453941-S   | rs2514594  | 8  | 119694330 | 113064 | 10.6159 | 0.65   | 7.79 | 6.45 | 4.92 | 3.98 | JPT |
| Hs.465789 | Hs.465789-S   | rs11670116 | 19 | 7981202   | 1602   | 6.2251  | 0.4383 | 6.07 | 5.51 | 4.38 | 3.68 | JPT |
| Hs.468081 | Hs.468081-S   | rs1465975  | 2  | 31323016  | 794405 | 6.5532  | 0.4498 | 6.7  | 5.68 | 4.47 | 3.56 | JPT |
| Hs.470569 | Hs.470569-S   | rs12072490 | 1  | 31257332  | 988961 | 6.2057  | 0.4371 | 7.57 | 5.15 | 4.11 | 3.41 | JPT |
| Hs.473917 | Hs.473917-S   | rs228046   | 21 | 42825006  | 5418   | 7.8913  | 0.5218 | 9.76 | 7.45 | 5.74 | 4.66 | JPT |
| Hs.473973 | Hs.473973-S   | rs2838456  | 21 | 44221396  | 14199  | 6.17    | 0.4349 | 6.5  | 5.8  | 4.84 | 4.05 | JPT |
| Hs.48344  | Hs.48344-S    | rs6781014  | 3  | 114239776 | 23089  | 5.3122  | 0.3809 | 6.05 | 5.3  | 4.32 | 3.62 | JPT |
| Hs.485895 | Hs.485895-S   | rs9450619  | 6  | 87884546  | 112144 | 10.8366 | 0.6583 | 6.59 | 5.46 | 4.33 | 3.59 | JPT |
| Hs.517172 | Hs.517172-S   | rs1883848  | 20 | 60998751  | 32951  | 9.3971  | 0.6006 | 6.1  | 5.57 | 4.33 | 3.6  | JPT |
| Hs.54543  | Hs.54543-S    | rs1430410  | 3  | 158008264 | 60251  | 8.7762  | 0.5729 | 6.34 | 5.41 | 4.42 | 3.59 | JPT |
| Hs.6637   | Hs.6637-S     | rs4752999  | 11 | 47385141  | 198594 | 14.4002 | 0.768  | 6.19 | 4.9  | 3.86 | 3.03 | JPT |
| Hs.98028  | Hs.98028-S    | rs580213   | 11 | 124183179 | 1156   | 6.5349  | 0.4566 | 7.37 | 5.51 | 4.48 | 3.7  | JPT |
| HSPC157   | GI_7661813-S  | rs1063117  | 1  | 22102194  | 605    | 6.609   | 0.4609 | 6.49 | 5.52 | 4.48 | 3.72 | JPT |
| HSRTSBETA | GI_42544116-I | rs2847325  | 18 | 693442    | 8950   | 14.8609 | 0.7794 | 7.06 | 5.53 | 4.24 | 3.53 | JPT |
| IL16      | GI_27262656-I | rs3898677  | 15 | 79383617  | 4278   | 7.0652  | 0.4866 | 7.86 | 6.14 | 4.62 | 3.75 | JPT |
| IPP       | GI_5174472-S  | rs2253862  | 1  | 45751053  | 82782  | 7.7224  | 0.5216 | 6.41 | 5.41 | 4.21 | 3.32 | JPT |
| IRF5      | GI_38683858-A | rs8043     | 7  | 128201335 | 18193  | 13.441  | 0.7425 | 5.88 | 5.23 | 4.27 | 3.51 | JPT |

|           |               |            |    |           |        |         |        |      |      |      |      |     |
|-----------|---------------|------------|----|-----------|--------|---------|--------|------|------|------|------|-----|
| ITIH4     | GI_40288189-S | rs2535627  | 3  | 52820145  | 2331   | 6.9638  | 0.481  | 5.83 | 5.24 | 4.25 | 3.47 | JPT |
| IVD       | GI_6031167-S  | rs2075624  | 15 | 38498015  | 29     | 7.0608  | 0.4947 | 7.12 | 5.26 | 4.31 | 3.55 | JPT |
| KIAA0265  | GI_44917618-S | rs12534379 | 7  | 129365068 | 2062   | 8.5428  | 0.5709 | 6.1  | 5.56 | 4.42 | 3.54 | JPT |
| KIAA1074  | GI_7662473-S  | rs1557167  | 10 | 27512116  | 170157 | 5.8296  | 0.414  | 7.21 | 5.44 | 4.37 | 3.62 | JPT |
| KIAA1449  | GI_21314694-S | rs1053530  | 3  | 39113086  | 410    | 9.2671  | 0.5863 | 6.9  | 5.25 | 4.36 | 3.58 | JPT |
| KIAA1463  | GI_39930390-S | rs11169520 | 12 | 49359790  | 65125  | 9.8523  | 0.6198 | 8.41 | 5.95 | 4.75 | 3.76 | JPT |
| KIAA1712  | GI_30794213-S | rs1553669  | 4  | 175612138 | 15920  | 7.1201  | 0.5067 | 6.4  | 5.33 | 4.42 | 3.65 | JPT |
| KIAA1913  | GI_40538800-S | rs12214250 | 6  | 130643473 | 162161 | 16.3597 | 0.8051 | 7.59 | 5.56 | 4.48 | 3.73 | JPT |
| KIAA1972  | GI_45387948-S | rs2305695  | 16 | 55725936  | 104382 | 6.6322  | 0.4622 | 7.67 | 5.89 | 4.67 | 3.9  | JPT |
| KUB3      | GI_32698766-S | rs10747788 | 12 | 56601605  | 35151  | 8.3311  | 0.5519 | 6.76 | 5.53 | 4.31 | 3.59 | JPT |
| LAMC1     | GI_9845497-S  | rs4652769  | 1  | 179740853 | 105440 | 6.8845  | 0.4765 | 5.69 | 5.11 | 4.29 | 3.58 | JPT |
| LCMT1     | GI_15082255-I | rs11074678 | 16 | 25057227  | 83455  | 12.8946 | 0.7267 | 7.86 | 5.75 | 4.54 | 3.73 | JPT |
| LGALS8    | GI_42544184-A | rs1041939  | 1  | 233037659 | 788    | 6.5585  | 0.5112 | 8.46 | 6.41 | 5.06 | 4.01 | JPT |
| LILRB3    | GI_5803059-S  | rs11672654 | 19 | 59425145  | 12513  | 8.8032  | 0.5656 | 9.69 | 6.48 | 5.19 | 4.22 | JPT |
| LOC126208 | GI_27485046-S | rs516022   | 19 | 61301183  | 10299  | 6.1     | 0.4467 | 6.26 | 5.58 | 4.49 | 3.75 | JPT |
| LOC130502 | GI_37539459-S | rs2293671  | 2  | 20059492  | 40089  | 8.5217  | 0.561  | 8.56 | 5.39 | 4.4  | 3.68 | JPT |
| LOC132241 | GI_42656828-S | rs7622524  | 3  | 130601620 | 8703   | 6.7327  | 0.4679 | 6.27 | 5.43 | 4.21 | 3.44 | JPT |
| LOC135043 | GI_17463264-S | rs10946158 | 6  | 166701700 | 25306  | 13.7487 | 0.751  | 7.2  | 5.41 | 4.54 | 3.81 | JPT |
| LOC144097 | GI_37541019-S | rs643634   | 11 | 63342380  | 9308   | 6.6457  | 0.463  | 7.39 | 5.6  | 4.25 | 3.48 | JPT |
| LOC147804 | GI_30154892-S | rs7248917  | 19 | 58631479  | 8142   | 6.315   | 0.4436 | 7    | 5.77 | 4.5  | 3.79 | JPT |
| LOC151963 | GI_31341922-S | rs2133864  | 3  | 194098959 | 101392 | 6.4868  | 0.4538 | 7.18 | 6.09 | 4.84 | 3.85 | JPT |
| LOC197322 | GI_28372536-S | rs3785414  | 16 | 87777900  | 28327  | 14.4858 | 0.7784 | 6.73 | 5.5  | 4.38 | 3.63 | JPT |
| LOC206962 | GI_22046332-S | rs3812561  | 9  | 136546713 | 13328  | 8.09    | 0.5401 | 7.26 | 6.34 | 4.79 | 3.89 | JPT |
| LOC222701 | GI_27498465-S | rs9283884  | 6  | 28243639  | 1563   | 5.6585  | 0.4108 | 6.88 | 5.08 | 4.12 | 3.3  | JPT |
| LOC282956 | GI_27483210-S | rs2428486  | 6  | 31462083  | 8468   | 12.9379 | 0.7196 | 7.17 | 5.39 | 4.37 | 3.68 | JPT |
| LOC283377 | GI_37542981-S | rs7302925  | 12 | 55147725  | 1805   | 8.6502  | 0.5671 | 7.48 | 6.47 | 4.9  | 3.77 | JPT |
| LOC283970 | GI_40217627-S | rs9939092  | 16 | 68596778  | 28928  | 20.3245 | 0.8785 | 7.03 | 5.27 | 4.18 | 3.31 | JPT |
| LOC284184 | GI_27500527-S | rs1048775  | 17 | 76816924  | 11379  | 6.2943  | 0.4424 | 5.99 | 5.29 | 4.25 | 3.56 | JPT |
| LOC284293 | GI_27485378-S | rs9955410  | 18 | 59771017  | 569    | 13.8846 | 0.7546 | 7.47 | 6.63 | 4.79 | 3.87 | JPT |
| LOC285407 | GI_37550539-S | rs9758051  | 3  | 131297567 | 2507   | 5.8824  | 0.4499 | 6.63 | 5.34 | 4.25 | 3.48 | JPT |
| LOC286353 | GI_27478844-S | rs1836404  | 9  | 95629819  | 18451  | 6.4388  | 0.4509 | 7.25 | 5.27 | 4.25 | 3.5  | JPT |
| LOC339053 | GI_29746836-S | rs7191155  | 16 | 19707714  | 82291  | 6.9125  | 0.4864 | 7.26 | 5.57 | 4.45 | 3.64 | JPT |
| LOC339229 | GI_41150782-S | rs7502869  | 17 | 77241821  | 974    | 5.9392  | 0.4286 | 6.1  | 5.42 | 4.31 | 3.55 | JPT |
| LOC339803 | GI_42656315-S | rs1729662  | 2  | 61302956  | 21956  | 9.2257  | 0.5845 | 6.62 | 5.13 | 4.18 | 3.4  | JPT |
| LOC339804 | GI_37546921-S | rs11498    | 2  | 61282470  | 19471  | 15.0649 | 0.7842 | 6.15 | 5.25 | 4.13 | 3.38 | JPT |
| LOC340435 | GI_29735811-S | rs6988053  | 8  | 71709517  | 72410  | 14.981  | 0.7823 | 7.16 | 5.75 | 4.53 | 3.71 | JPT |
| LOC345462 | GI_37550406-S | rs2047354  | 5  | 178387853 | 5273   | 6.3945  | 0.4483 | 7.02 | 5.85 | 4.54 | 3.74 | JPT |
| LOC347981 | GI_30160064-S | rs4078116  | 6  | 29960516  | 2027   | 12.7477 | 0.7223 | 6.06 | 5.4  | 4.35 | 3.55 | JPT |
| LOC374747 | GI_37541845-S | rs4567733  | 16 | 76302851  | 30261  | 6.6312  | 0.4621 | 7.34 | 6.09 | 4.79 | 4.01 | JPT |
| LOC374758 | GI_37544593-S | rs8064453  | 17 | 265835    | 1665   | 6.2115  | 0.4374 | 7.42 | 5.46 | 4.48 | 3.66 | JPT |
| LOC375097 | GI_37555934-S | rs805531   | 20 | 36508140  | 25206  | 7.9565  | 0.5335 | 7.52 | 5.36 | 4.27 | 3.52 | JPT |
| LOC375249 | GI_37547210-S | rs2290127  | 2  | 97777553  | 547289 | 7.7121  | 0.5127 | 7.83 | 6.16 | 4.59 | 3.5  | JPT |
| LOC375671 | GI_37556019-S | rs2546220  | 8  | 74331172  | 621    | 5.9987  | 0.4245 | 6.38 | 5.43 | 4.39 | 3.65 | JPT |
| LOC377696 | GI_37555914-S | rs2514594  | 8  | 119694330 | 32156  | 9.4459  | 0.6027 | 7.1  | 6.04 | 4.91 | 3.97 | JPT |
| LOC378075 | GI_37538916-S | rs10232851 | 7  | 55603043  | 354891 | 14.1986 | 0.7795 | 7    | 5.76 | 4.49 | 3.56 | JPT |
| LOC387895 | GI_41149833-S | rs1617132  | 12 | 125781577 | 24174  | 15.5943 | 0.7963 | 13   | 8.74 | 6.08 | 4.66 | JPT |
| LOC387905 | GI_41202581-S | rs7336525  | 13 | 20816844  | 20     | 6.8622  | 0.4753 | 6.68 | 5.57 | 4.4  | 3.64 | JPT |
| LOC388274 | GI_41150288-S | rs1420871  | 16 | 49372933  | 44899  | 5.6605  | 0.4034 | 5.96 | 5.24 | 4.33 | 3.62 | JPT |
| LOC388299 | GI_41150379-S | rs4567733  | 16 | 76302851  | 30231  | 6.8545  | 0.4748 | 6.5  | 5.81 | 4.64 | 3.86 | JPT |
| LOC389362 | GI_41147302-S | rs4602754  | 6  | 3207500   | 5612   | 7.8602  | 0.5286 | 7.25 | 5.63 | 4.49 | 3.76 | JPT |
| LOC389456 | GI_41147544-S | rs12535516 | 7  | 887681    | 3080   | 5.6952  | 0.4132 | 8    | 5.63 | 4.5  | 3.59 | JPT |
| LOC389562 | GI_41147546-S | rs2270164  | 7  | 138935139 | 15196  | 6.7566  | 0.4693 | 6.96 | 5.76 | 4.6  | 3.74 | JPT |
| LOC392620 | GI_41147689-S | rs798497   | 7  | 2569198   | 34300  | 6.0592  | 0.4442 | 6.4  | 5.36 | 4.39 | 3.66 | JPT |
| LOC399987 | GI_42660080-S | rs9300302  | 12 | 3737732   | 1669   | 11.7124 | 0.6893 | 6.54 | 5.5  | 4.52 | 3.86 | JPT |
| LOC400051 | GI_42659981-S | rs2051993  | 12 | 66699945  | 1068   | 11.1965 | 0.6714 | 6.32 | 5.75 | 4.5  | 3.79 | JPT |
| LOC400410 | GI_42660516-S | rs2586183  | 15 | 77967161  | 26852  | 11.2554 | 0.6735 | 7.36 | 5.51 | 4.42 | 3.74 | JPT |

|           |               |            |    |           |        |         |        |      |      |      |      |     |
|-----------|---------------|------------|----|-----------|--------|---------|--------|------|------|------|------|-----|
| LOC400566 | GI_42661283-S | rs8064453  | 17 | 265835    | 1193   | 10.6679 | 0.652  | 6.69 | 5.47 | 4.39 | 3.57 | JPT |
| LOC400571 | GI_42661084-S | rs10438740 | 17 | 7413608   | 12770  | 8.0096  | 0.5361 | 6.66 | 5.16 | 4.43 | 3.67 | JPT |
| LOC400642 | GI_42661344-S | rs2135308  | 18 | 5212146   | 24205  | 13.7484 | 0.751  | 8.54 | 7.1  | 5.01 | 3.99 | JPT |
| LOC400933 | GI_42662518-S | rs135878   | 22 | 48335230  | 205766 | 12.5819 | 0.7348 | 6.98 | 5.85 | 4.6  | 3.92 | JPT |
| LOC401135 | GI_42657007-S | rs10518042 | 4  | 68431669  | 14838  | 7.0868  | 0.4878 | 6.62 | 5.53 | 4.19 | 3.42 | JPT |
| LOC401245 | GI_42657607-S | rs9380167  | 6  | 30382440  | 14959  | 7.0005  | 0.4749 | 6.78 | 5.57 | 4.38 | 3.65 | JPT |
| LOC401560 | GI_42659039-S | rs3812561  | 9  | 136546713 | 13381  | 8.8639  | 0.577  | 8.38 | 6.8  | 5.33 | 4.14 | JPT |
| LOC51240  | GI_31377759-S | rs1055091  | 2  | 190460649 | 343    | 19.2345 | 0.8631 | 6.25 | 5.21 | 4.28 | 3.42 | JPT |
| LOC87769  | GI_34147452-S | rs9554707  | 13 | 100037593 | 55616  | 11.9597 | 0.6975 | 6.92 | 5.97 | 4.74 | 3.85 | JPT |
| LOC91120  | GI_15150800-S | rs7248612  | 19 | 19824086  | 154231 | 5.6003  | 0.3996 | 6.05 | 5.16 | 4.12 | 3.4  | JPT |
| LTBR      | GI_4505038-S  | rs10774430 | 12 | 6375034   | 4306   | 6.7917  | 0.506  | 9.84 | 6.07 | 4.78 | 3.96 | JPT |
| LZIC      | GI_40255081-S | rs3003376  | 1  | 10005567  | 81025  | 10.3061 | 0.6381 | 6.96 | 5.39 | 4.51 | 3.72 | JPT |
| MAP1B     | GI_14165455-A | rs1217816  | 5  | 71424094  | 113859 | 7.5253  | 0.5113 | 7.51 | 5.53 | 4.34 | 3.48 | JPT |
| MASTL     | GI_14249561-S | rs11015588 | 10 | 27508768  | 6682   | 6.762   | 0.4696 | 6.41 | 5.49 | 4.43 | 3.66 | JPT |
| MGC10120  | GI_28603839-S | rs12762869 | 10 | 101983702 | 40795  | 11.4576 | 0.6806 | 6.13 | 5.67 | 4.53 | 3.63 | JPT |
| MGC10854  | GI_40254984-S | rs925368   | 12 | 108853699 | 36366  | 5.6929  | 0.4054 | 6.14 | 5.15 | 4.35 | 3.46 | JPT |
| MGC12458  | GI_14150107-S | rs586013   | 1  | 241517934 | 59146  | 13.8528 | 0.7538 | 6.62 | 5.57 | 4.63 | 3.84 | JPT |
| MGC15763  | GI_19923906-S | rs567541   | 3  | 16339621  | 21379  | 6.9208  | 0.4786 | 6.63 | 5.44 | 4.57 | 3.69 | JPT |
| MGC19764  | GI_42661257-S | rs883416   | 17 | 30594554  | 24027  | 10.1381 | 0.6314 | 6.53 | 5.56 | 4.46 | 3.7  | JPT |
| MGC20781  | GI_34147471-S | rs2074162  | 17 | 37468202  | 233051 | 9.1482  | 0.5987 | 6.79 | 5.2  | 3.99 | 3.29 | JPT |
| MGC21518  | GI_21687219-S | rs2189387  | 17 | 36293632  | 48847  | 4.9818  | 0.3588 | 5.41 | 4.92 | 4.09 | 3.4  | JPT |
| MGC21644  | GI_45505153-A | rs340033   | 5  | 145170174 | 50052  | 5.7928  | 0.4117 | 8.7  | 5.47 | 4.37 | 3.48 | JPT |
| MGC22773  | GI_21687083-S | rs1412825  | 1  | 74375835  | 17816  | 14.9484 | 0.7815 | 6.95 | 5.48 | 4.04 | 3.34 | JPT |
| MGC22960  | GI_40316917-S | rs4660963  | 1  | 47045856  | 503375 | 5.4949  | 0.3928 | 5.93 | 5.05 | 4.13 | 3.37 | JPT |
| MGC24665  | GI_24308244-S | rs12445900 | 16 | 11312331  | 40586  | 7.1467  | 0.4829 | 6.61 | 5.37 | 4.4  | 3.71 | JPT |
| MGC2752   | GI_33859747-S | rs3794965  | 19 | 63761165  | 24047  | 16.0593 | 0.8064 | 6.36 | 5.37 | 4.05 | 3.28 | JPT |
| MGC3248   | GI_34147426-S | rs26764    | 16 | 23619426  | 31036  | 6.8979  | 0.4773 | 6.22 | 5.15 | 4.42 | 3.62 | JPT |
| MGC35033  | GI_34303924-S | rs2468939  | 12 | 47134509  | 41781  | 7.7774  | 0.533  | 8.98 | 6.44 | 4.89 | 3.83 | JPT |
| MGC35308  | GI_31341688-S | rs7759603  | 6  | 166675043 | 15350  | 5.4877  | 0.3923 | 7.17 | 5.41 | 4.56 | 3.81 | JPT |
| MGC3794   | GI_33239373-S | rs4657739  | 1  | 164874147 | 27069  | 10.9046 | 0.6608 | 6.7  | 5.36 | 4.31 | 3.63 | JPT |
| MGC39633  | GI_22749136-S | rs1005056  | 5  | 114608641 | 23880  | 5.9755  | 0.4231 | 7    | 5.78 | 4.66 | 3.72 | JPT |
| MGC40397  | GI_22748696-S | rs10861310 | 12 | 103930868 | 42882  | 5.6991  | 0.4213 | 6.92 | 5.52 | 4.39 | 3.72 | JPT |
| MGC4083   | GI_14210535-S | rs11663340 | 18 | 12323686  | 7490   | 5.3644  | 0.3916 | 6.8  | 5.2  | 4.3  | 3.57 | JPT |
| MGC5391   | GI_29126184-S | rs10496660 | 2  | 127629274 | 548037 | 5.5028  | 0.3933 | 7.05 | 5.33 | 4.28 | 3.48 | JPT |
| MK-STYX   | GI_32481212-S | rs8565     | 7  | 75274925  | 17     | 5.8416  | 0.4148 | 5.66 | 4.99 | 4.07 | 3.36 | JPT |
| MMRP19    | GI_7705723-S  | rs2288667  | 11 | 34860975  | 5553   | 6.7278  | 0.4677 | 6.59 | 5.46 | 4.46 | 3.75 | JPT |
| MPHOSPH1  | GI_7705347-S  | rs727427   | 10 | 91390364  | 134203 | 6.3832  | 0.4477 | 6.8  | 5.49 | 4.58 | 3.69 | JPT |
| MRPL21    | GI_31652223-A | rs483626   | 11 | 68441431  | 26017  | 12.8057 | 0.7156 | 6.93 | 5.75 | 4.56 | 3.71 | JPT |
| MRPL43    | GI_28872735-A | rs927302   | 10 | 102712906 | 23703  | 15.1202 | 0.7855 | 8.21 | 5.41 | 4.24 | 3.44 | JPT |
| MRPL53    | GI_22035595-S | rs3771744  | 2  | 74490191  | 121203 | 7.6359  | 0.5171 | 6.51 | 5.18 | 4.24 | 3.49 | JPT |
| MRVLC2    | GI_21687269-S | rs26685    | 5  | 68068766  | 706741 | 5.9798  | 0.4311 | 6.94 | 5.05 | 3.97 | 3.18 | JPT |
| MTRR      | GI_4505278-A  | rs6555501  | 5  | 7932983   | 21007  | 6.9928  | 0.4826 | 6.53 | 5.59 | 4.4  | 3.68 | JPT |
| MYBL2     | GI_31652260-S | rs439115   | 20 | 41704335  | 74005  | 5.7506  | 0.4091 | 7.24 | 5.4  | 4.35 | 3.66 | JPT |
| MYOM2     | GI_4505314-S  | rs6990007  | 8  | 2054882   | 25671  | 6.0555  | 0.4204 | 7.68 | 5.36 | 4.56 | 3.88 | JPT |
| N2N       | GI_44917616-S | rs2143909  | 1  | 143594029 | 823005 | 4.6845  | 0.3383 | 5.46 | 4.48 | 3.73 | 3.03 | JPT |
| NBEA      | GI_21536251-S | rs7334333  | 13 | 34411594  | 732792 | 6.8638  | 0.4754 | 7.71 | 6.6  | 5.21 | 4.08 | JPT |
| NDUFS5    | GI_4758789-S  | rs12032116 | 1  | 39189402  | 28266  | 11.4224 | 0.6793 | 6.2  | 5.27 | 4.4  | 3.62 | JPT |
| NDUFV3    | GI_21361323-S | rs2839603  | 21 | 43197575  | 4490   | 8.9241  | 0.5711 | 8.52 | 7.55 | 5.47 | 4.42 | JPT |
| NIPSNAP3B | GI_21361742-S | rs2162116  | 9  | 104608968 | 6853   | 5.742   | 0.4085 | 7.03 | 5.71 | 4.43 | 3.66 | JPT |
| NMNAT3    | GI_31342325-S | rs10935342 | 3  | 140888040 | 126177 | 11.9406 | 0.6969 | 7.12 | 6.18 | 4.79 | 3.85 | JPT |
| NOR1      | GI_45643130-I | rs3738836  | 1  | 36554101  | 9002   | 11.9818 | 0.6982 | 6.97 | 5.81 | 4.61 | 3.67 | JPT |
| NPEPL1    | GI_20070332-S | rs2426778  | 20 | 56726884  | 2673   | 7.0134  | 0.4756 | 6.42 | 5.45 | 4.43 | 3.69 | JPT |
| NQO2      | GI_4505416-S  | rs1143684  | 6  | 2955389   | 6760   | 8.6322  | 0.5663 | 7.24 | 5.57 | 4.6  | 3.79 | JPT |
| NR2F2     | GI_31377723-S | rs981923   | 15 | 94384637  | 298009 | 7.6788  | 0.5193 | 7.61 | 6.64 | 5.08 | 4.05 | JPT |
| NUDT2     | GI_22265329-I | rs4310287  | 9  | 34364979  | 38725  | 20.4581 | 0.8803 | 7.16 | 5.67 | 4.32 | 3.54 | JPT |
| OAS1      | GI_8051622-I  | rs4767027  | 12 | 111821877 | 3619   | 10.3692 | 0.6318 | 7.49 | 5.84 | 4.56 | 3.74 | JPT |

|           |               |            |    |           |        |         |        |      |      |      |      |     |
|-----------|---------------|------------|----|-----------|--------|---------|--------|------|------|------|------|-----|
| PAQR6     | GI_24432010-S | rs1543294  | 1  | 153022930 | 3518   | 5.6046  | 0.3998 | 5.61 | 4.92 | 4.03 | 3.36 | JPT |
| PBP       | GI_38016928-S | rs428073   | 12 | 117145471 | 99535  | 5.4583  | 0.3904 | 6.3  | 5.43 | 4.51 | 3.8  | JPT |
| PEX6      | GI_21361243-S | rs2395943  | 6  | 43048651  | 8748   | 10.5537 | 0.6389 | 7.11 | 5.35 | 4.42 | 3.64 | JPT |
| PFAAP5    | GI_7656970-S  | rs718444   | 13 | 32045052  | 55774  | 6.2677  | 0.4331 | 6.88 | 5.24 | 4.39 | 3.65 | JPT |
| PHACS     | GI_14211920-S | rs2074038  | 11 | 44044565  | 17304  | 21.2355 | 0.89   | 7.05 | 6.19 | 4.52 | 3.79 | JPT |
| PIGN      | GI_34328903-A | rs565610   | 18 | 57848576  | 14414  | 8.2654  | 0.5488 | 6.3  | 5.55 | 4.45 | 3.66 | JPT |
| PKHD1L1   | GI_31377831-S | rs1563580  | 8  | 110575280 | 32975  | 19.3952 | 0.8655 | 6.09 | 5.35 | 4.21 | 3.4  | JPT |
| PLA2G4C   | GI_4505850-S  | rs2307279  | 19 | 53300410  | 57426  | 5.9278  | 0.4201 | 6.53 | 5.48 | 4.48 | 3.7  | JPT |
| PNN       | GI_33356173-S | rs8018720  | 14 | 38625936  | 94660  | 12.5052 | 0.7149 | 6.2  | 5.43 | 4.24 | 3.54 | JPT |
| POLE4     | GI_38455393-S | rs12617404 | 2  | 75102296  | 6017   | 6.7843  | 0.4709 | 5.92 | 5.22 | 4.44 | 3.64 | JPT |
| POLR1A    | GI_7661685-S  | rs1978842  | 2  | 86138197  | 28542  | 11.7421 | 0.6903 | 7.14 | 6    | 4.66 | 3.67 | JPT |
| POLR2E    | GI_14589950-S | rs6843     | 19 | 1039285   | 9      | 14.2939 | 0.7653 | 6.52 | 5.9  | 4.69 | 3.88 | JPT |
| POLR3F    | GI_33598951-S | rs2295557  | 20 | 18471864  | 58792  | 6.3234  | 0.4364 | 6.31 | 5.29 | 4.39 | 3.62 | JPT |
| PP3856    | GI_40255088-S | rs4874159  | 8  | 144742093 | 13960  | 8.3762  | 0.5541 | 6.53 | 5.71 | 4.52 | 3.69 | JPT |
| PPA2      | GI_31881619-A | rs11932428 | 4  | 106644740 | 3679   | 15.1682 | 0.7946 | 6.79 | 5.26 | 4.18 | 3.36 | JPT |
| PPIH      | GI_45439322-S | rs3738516  | 1  | 43109294  | 307122 | 5.182   | 0.3795 | 6.2  | 5.07 | 4.19 | 3.45 | JPT |
| PRIC285   | GI_34335259-S | rs1291206  | 20 | 61799613  | 139576 | 5.9804  | 0.4234 | 6.45 | 5.69 | 4.31 | 3.58 | JPT |
| PRKCM     | GI_4506074-S  | rs4441176  | 14 | 29388428  | 272228 | 6.7374  | 0.4603 | 6.3  | 5.25 | 4.22 | 3.54 | JPT |
| PRO0149   | GI_38016918-S | rs9926522  | 16 | 9124449   | 3613   | 6.7895  | 0.4712 | 6.43 | 5.61 | 4.49 | 3.73 | JPT |
| PROL4     | GI_6005801-S  | rs1376251  | 12 | 11030119  | 139168 | 6.3519  | 0.4458 | 7.76 | 6.2  | 4.98 | 4.05 | JPT |
| PTER      | GI_20070185-S | rs1055340  | 10 | 16595534  | 974    | 12.9569 | 0.7286 | 8.78 | 6.79 | 5.1  | 4.03 | JPT |
| R29124_1  | GI_16117774-S | rs714106   | 19 | 46775689  | 1914   | 8.4588  | 0.5581 | 6.91 | 5.4  | 4.19 | 3.45 | JPT |
| RAB6C     | GI_14149798-S | rs17049711 | 2  | 130240265 | 216002 | 5.2835  | 0.379  | 7.15 | 5.26 | 4.14 | 3.45 | JPT |
| RABGEF1   | GI_7657495-S  | rs3735141  | 7  | 64864490  | 855610 | 9.4932  | 0.6048 | 7.43 | 5.62 | 4.31 | 3.41 | JPT |
| RAD18     | GI_14550404-S | rs250405   | 3  | 8900041   | 2983   | 8.2233  | 0.5645 | 6.81 | 5.39 | 4.37 | 3.71 | JPT |
| RAD51C    | GI_17402895-I | rs714959   | 17 | 53983600  | 145568 | 7.074   | 0.4871 | 7.26 | 5.4  | 4.06 | 3.31 | JPT |
| RAMP1     | GI_5032018-S  | rs6741923  | 2  | 238581206 | 21449  | 8.8099  | 0.5834 | 6.2  | 5.39 | 4.46 | 3.68 | JPT |
| raptor    | GI_22094986-S | rs1062935  | 17 | 76554452  | 37     | 7.6361  | 0.5171 | 6.72 | 5.33 | 4.34 | 3.64 | JPT |
| RASSF6    | GI_41393612-A | rs1247583  | 4  | 74854306  | 38232  | 5.2547  | 0.3771 | 6.27 | 4.94 | 4.12 | 3.44 | JPT |
| RBMS2     | GI_4506448-S  | rs3782235  | 12 | 55201814  | 67204  | 6.1181  | 0.4318 | 6.47 | 5.6  | 4.4  | 3.57 | JPT |
| RPH3AL    | GI_31543557-S | rs4890194  | 17 | 81136     | 18755  | 8.5707  | 0.5634 | 7.89 | 6.01 | 4.49 | 3.66 | JPT |
| RPL37A    | GI_16306561-S | rs3732019  | 2  | 217187892 | 1196   | 18.8386 | 0.8571 | 9.24 | 6.99 | 5.65 | 4.42 | JPT |
| RPS6KB2   | GI_4506738-S  | rs1476792  | 11 | 66952813  | 6532   | 7.8184  | 0.5265 | 6.71 | 5.63 | 4.48 | 3.52 | JPT |
| S100A13   | GI_41117409-S | rs2274739  | 1  | 150425206 | 13257  | 9.5507  | 0.6072 | 6.12 | 5.16 | 4.14 | 3.44 | JPT |
| SCLY      | GI_39725671-S | rs2252416  | 2  | 238768386 | 21424  | 5.6235  | 0.401  | 6.83 | 5.57 | 4.54 | 3.74 | JPT |
| SERPINB10 | GI_4826901-S  | rs10513932 | 18 | 59719294  | 33898  | 8.9785  | 0.6192 | 7.82 | 5.68 | 4.57 | 3.8  | JPT |
| SF1       | GI_42544126-I | rs523200   | 11 | 64289155  | 11144  | 16.4601 | 0.8147 | 8.44 | 5.51 | 4.24 | 3.46 | JPT |
| SFRS10    | GI_4759097-S  | rs2251407  | 3  | 187137626 | 20262  | 7.5527  | 0.5128 | 7.45 | 5.55 | 4.51 | 3.72 | JPT |
| SFXN2     | GI_34222270-S | rs2902548  | 10 | 104477372 | 11419  | 10.8874 | 0.6602 | 6.34 | 5.1  | 4.16 | 3.36 | JPT |
| SHMT1     | GI_22547185-I | rs854773   | 17 | 17995593  | 184060 | 6.0747  | 0.4451 | 6.04 | 5.51 | 4.23 | 3.43 | JPT |
| SIVA      | GI_11277467-I | rs4983543  | 14 | 104283444 | 9719   | 7.4374  | 0.5067 | 6.28 | 5.23 | 4.24 | 3.5  | JPT |
| SLC2A8    | GI_21361448-S | rs2298182  | 9  | 127286223 | 36832  | 5.8304  | 0.4141 | 7.71 | 5.34 | 4.4  | 3.65 | JPT |
| SLC37A2   | GI_38093648-S | rs2155355  | 11 | 125369536 | 905261 | 5.542   | 0.3958 | 8.21 | 5.35 | 4.37 | 3.63 | JPT |
| SLC7A7    | GI_21361562-S | rs2281678  | 14 | 22354008  | 41591  | 9.166   | 0.5905 | 6.01 | 5.57 | 4.53 | 3.68 | JPT |
| SNX16     | GI_23238247-A | rs4272332  | 8  | 82870584  | 3975   | 10.1425 | 0.6316 | 6.45 | 5.58 | 4.34 | 3.55 | JPT |
| SNX7      | GI_23111054-A | rs9285629  | 1  | 98849718  | 87955  | 13.4225 | 0.742  | 14.7 | 8.67 | 5.6  | 4.2  | JPT |
| SOS1      | GI_15529995-S | rs921433   | 2  | 38934562  | 190188 | 7.5301  | 0.5033 | 7.19 | 5.81 | 4.64 | 3.76 | JPT |
| SPA17     | GI_15718773-S | rs11825168 | 11 | 124043411 | 26063  | 8.6845  | 0.5601 | 6.37 | 5.56 | 4.35 | 3.68 | JPT |
| SPG7      | GI_40806172-I | rs3803676  | 16 | 88123607  | 7762   | 6.9402  | 0.4797 | 6.16 | 5.28 | 4.33 | 3.58 | JPT |
| SPINT2    | GI_10863908-S | rs3786870  | 19 | 43447704  | 26914  | 7.4068  | 0.5051 | 6.84 | 5.6  | 4.31 | 3.55 | JPT |
| SQSTM1    | GI_19923742-S | rs10277    | 5  | 179197337 | 249    | 5.5261  | 0.3948 | 6.45 | 5.43 | 4.46 | 3.71 | JPT |
| ST7L      | GI_38201636-A | rs3748656  | 1  | 112948723 | 152024 | 6.0581  | 0.4206 | 6.41 | 5.42 | 4.27 | 3.53 | JPT |
| STAT6     | GI_23397677-S | rs324019   | 12 | 55772914  | 2679   | 7.9797  | 0.5615 | 6.75 | 5.58 | 4.28 | 3.5  | JPT |
| STEAP     | GI_22027487-S | rs13224065 | 7  | 89447014  | 8383   | 7.104   | 0.524  | 7.38 | 5.34 | 4.38 | 3.59 | JPT |
| STK25     | GI_34147665-S | rs7568     | 2  | 242011733 | 142878 | 11.7962 | 0.6921 | 6.52 | 5.2  | 4.24 | 3.49 | JPT |
| SUPT3H    | GI_4507308-A  | rs1284988  | 6  | 45172750  | 143649 | 10.1632 | 0.6505 | 7.19 | 5.65 | 4.38 | 3.59 | JPT |



|          |               |            |    |           |        |         |        |      |      |      |      |     |
|----------|---------------|------------|----|-----------|--------|---------|--------|------|------|------|------|-----|
| SURF1    | GI_19557683-S | rs12335    | 9  | 133227388 | 21486  | 6.9472  | 0.48   | 6.58 | 5.57 | 4.49 | 3.72 | JPT |
| TAF4B    | GI_37545625-S | rs7228427  | 18 | 22572837  | 347689 | 6.1161  | 0.4317 | 7.11 | 5.54 | 4.47 | 3.76 | JPT |
| TAP2     | GI_9961247-I  | rs3916765  | 6  | 32793528  | 104346 | 10.9574 | 0.6716 | 7.13 | 6.1  | 4.86 | 3.88 | JPT |
| TAPBP-R  | GI_34222333-S | rs2532496  | 12 | 6434709   | 6923   | 6.7247  | 0.4757 | 6.94 | 5.44 | 4.46 | 3.77 | JPT |
| TBC1D4   | GI_42660198-S | rs529638   | 13 | 74762518  | 5143   | 5.9678  | 0.4226 | 7.09 | 5.35 | 4.38 | 3.61 | JPT |
| TCL6     | GI_21536345-A | rs3759537  | 14 | 95204869  | 2625   | 12.6294 | 0.7102 | 8.46 | 6.52 | 5.13 | 4.08 | JPT |
| TEAD4    | GI_4507426-S  | rs10774085 | 12 | 2930485   | 89581  | 5.9937  | 0.4242 | 6.52 | 5.66 | 4.53 | 3.84 | JPT |
| TFAM     | GI_4507400-I  | rs10826176 | 10 | 59811543  | 14230  | 12.4922 | 0.7145 | 6.51 | 5.41 | 4.22 | 3.49 | JPT |
| THAP5    | GI_32698887-S | rs40915    | 7  | 107776670 | 22024  | 8.5268  | 0.5613 | 6.83 | 5.57 | 4.57 | 3.69 | JPT |
| THAP6    | GI_37059751-S | rs1478174  | 4  | 76750368  | 60711  | 5.6164  | 0.4006 | 6.03 | 5.54 | 4.22 | 3.47 | JPT |
| TIMM10   | GI_6912707-S  | rs2649662  | 11 | 57109138  | 56520  | 8.6968  | 0.5693 | 7.25 | 6.31 | 4.86 | 3.64 | JPT |
| TK2      | GI_33636700-S | rs725131   | 16 | 65143211  | 40964  | 5.8861  | 0.4176 | 6.63 | 5.28 | 4.16 | 3.36 | JPT |
| TLR1     | GI_41350336-S | rs3924112  | 4  | 38618376  | 2313   | 5.5848  | 0.3986 | 6.4  | 5.52 | 4.46 | 3.75 | JPT |
| TLR10    | GI_13569929-S | rs5743595  | 4  | 38625210  | 27728  | 7.0009  | 0.483  | 6.73 | 5.45 | 4.46 | 3.78 | JPT |
| TLR6     | GI_20143970-S | rs5743595  | 4  | 38625210  | 25910  | 5.8139  | 0.4131 | 7.03 | 5.48 | 4.51 | 3.79 | JPT |
| TMPIT    | GI_13994299-S | rs3801472  | 7  | 75274429  | 13270  | 6.195   | 0.4444 | 7.76 | 5.4  | 4.31 | 3.51 | JPT |
| TNFRSF18 | GI_23238193-A | rs6603793  | 1  | 1590522   | 411687 | 5.1053  | 0.3743 | 5.54 | 4.95 | 3.89 | 3.18 | JPT |
| TNFRSF6  | GI_23510430-A | rs7915235  | 10 | 90769077  | 3897   | 5.7876  | 0.4114 | 6.17 | 5.23 | 4.28 | 3.67 | JPT |
| TOMM34   | GI_40807467-S | rs10485453 | 20 | 43002140  | 2254   | 7.6717  | 0.519  | 6.49 | 5.4  | 4.4  | 3.58 | JPT |
| TRIM4    | GI_15011940-A | rs1048705  | 7  | 99133591  | 218    | 6.7181  | 0.4671 | 6.14 | 5.05 | 3.95 | 3.26 | JPT |
| TSGA10   | GI_41281983-I | rs7606635  | 2  | 99103300  | 113127 | 6.1282  | 0.4248 | 6.82 | 5.31 | 4.16 | 3.39 | JPT |
| UBA52    | GI_15451941-S | rs12609505 | 19 | 18535057  | 11923  | 23.8507 | 0.9174 | 8.36 | 5.17 | 4.25 | 3.54 | JPT |
| UBE2L3   | GI_38157977-A | rs5754295  | 22 | 20276294  | 26473  | 5.8252  | 0.4138 | 6.29 | 5.55 | 4.48 | 3.73 | JPT |
| UGT2B10  | GI_27552756-S | rs3100645  | 4  | 69671954  | 205302 | 14.7923 | 0.7777 | 8.16 | 6.05 | 4.43 | 3.48 | JPT |
| UGT2B11  | GI_4507822-S  | rs13144491 | 4  | 69273573  | 973550 | 29.7187 | 0.9565 | 9.85 | 6.15 | 4.57 | 3.64 | JPT |
| UGT2B17  | GI_4507820-S  | rs13144491 | 4  | 69273573  | 41744  | 29.6363 | 0.9561 | 8.05 | 5.74 | 4.36 | 3.48 | JPT |
| UGT2B7   | GI_4507824-S  | rs13144491 | 4  | 69273573  | 885483 | 26.9553 | 0.9412 | 7.78 | 6.14 | 4.68 | 3.65 | JPT |
| UMP-CMPK | GI_7706496-S  | rs4492666  | 1  | 47512865  | 43160  | 5.6699  | 0.4194 | 6.19 | 5.23 | 4.28 | 3.56 | JPT |
| UMPS     | GI_4507834-S  | rs333312   | 3  | 125822164 | 123725 | 6.7851  | 0.4709 | 6.39 | 5.54 | 4.41 | 3.62 | JPT |
| UNQ2430  | GI_41190797-S | rs2276645  | 2  | 97788570  | 500611 | 5.7637  | 0.4099 | 6.55 | 5.21 | 4.35 | 3.46 | JPT |
| USMG5    | GI_14249375-S | rs7831     | 10 | 105195292 | 51257  | 20.1499 | 0.8762 | 6.25 | 5.3  | 4.27 | 3.5  | JPT |
| UTS2     | GI_12056478-I | rs161803   | 1  | 7910055   | 62324  | 7.5268  | 0.5114 | 8.01 | 6.09 | 4.7  | 3.79 | JPT |
| VPS13A   | GI_15619007-I | rs10491839 | 9  | 77270451  | 41099  | 15.2591 | 0.7888 | 6.7  | 5.61 | 4.49 | 3.74 | JPT |
| WBSCR27  | GI_30795189-S | rs6946037  | 7  | 72681366  | 12436  | 8.0216  | 0.5367 | 5.95 | 5    | 4.06 | 3.33 | JPT |
| WDFY1    | GI_30795191-I | rs633956   | 2  | 224564462 | 43716  | 6.1144  | 0.4316 | 7.56 | 5.4  | 4.48 | 3.69 | JPT |
| WDR33    | GI_19923528-S | rs10496660 | 2  | 127629274 | 550773 | 5.1351  | 0.3691 | 6.6  | 5.09 | 4.27 | 3.53 | JPT |
| XRRA1    | GI_42659736-S | rs2298746  | 11 | 74231482  | 1489   | 16.2085 | 0.8095 | 6.74 | 5.5  | 4.29 | 3.54 | JPT |
| ZCCHC4   | GI_42657116-S | rs3796779  | 4  | 25020616  | 27553  | 8.0556  | 0.5472 | 7.33 | 5.85 | 4.77 | 3.88 | JPT |
| ZMYND12  | GI_34222153-S | rs3748846  | 1  | 42608114  | 42711  | 6.9091  | 0.4779 | 6.12 | 5.53 | 4.29 | 3.51 | JPT |
| ZNF175   | GI_37594438-S | rs1379284  | 19 | 56763379  | 21351  | 5.9197  | 0.4122 | 6.97 | 5.59 | 4.51 | 3.79 | JPT |
| ZNF230   | GI_5454181-S  | rs12753    | 19 | 49207354  | 175    | 6.9839  | 0.4821 | 7.11 | 5.46 | 4.45 | 3.67 | JPT |
| ZNF587   | GI_14249531-S | rs1047405  | 19 | 63072690  | 955    | 5.0918  | 0.3662 | 6.63 | 5.05 | 4.18 | 3.49 | JPT |
| ZNF79    | GI_24307936-S | rs10739692 | 9  | 127272319 | 14846  | 6.3596  | 0.4463 | 6.92 | 5.48 | 4.49 | 3.61 | JPT |
| ZNFN1A1  | GI_31657112-S | rs7792486  | 7  | 50260518  | 16155  | 8.9187  | 0.5795 | 8.29 | 5.31 | 4.31 | 3.6  | JPT |
| ZNRD1    | GI_25777706-I | rs11755984 | 6  | 30061014  | 76191  | 6.454   | 0.444  | 7.55 | 5.73 | 4.6  | 3.71 | JPT |
| ABC1     | GI_38142463-S | rs10515177 | 17 | 55522267  | 46816  | 13.7608 | 0.6404 | 6.19 | 5.54 | 4.32 | 4.32 | YRI |
| ACN9     | GI_9910179-S  | rs6973504  | 7  | 96392135  | 62985  | 6.0153  | 0.3297 | 7.33 | 5.72 | 4.69 | 4.69 | YRI |
| ACY1L2   | GI_37551403-S | rs4053639  | 6  | 89921398  | 7170   | 6.2041  | 0.3822 | 6.71 | 5.75 | 4.62 | 4.62 | YRI |
| AK2      | GI_26665889-I | rs11811191 | 1  | 33206037  | 58188  | 8.1005  | 0.4297 | 6.94 | 5.57 | 4.52 | 4.52 | YRI |
| ALDH1A3  | GI_4502040-S  | rs11852748 | 15 | 99191558  | 82041  | 9.9951  | 0.5081 | 12.2 | 9.18 | 6.32 | 6.32 | YRI |
| AP4M1    | GI_14917110-S | rs3807479  | 7  | 99361552  | 12404  | 8.0167  | 0.4316 | 7.44 | 5.62 | 4.36 | 4.36 | YRI |
| APOA1BP  | GI_21426826-S | rs4661189  | 1  | 153373634 | 3431   | 6.9241  | 0.3752 | 6.7  | 5.47 | 4.59 | 4.59 | YRI |
| ARHGAP12 | GI_26986533-S | rs12269395 | 10 | 32165259  | 29923  | 5.7975  | 0.323  | 6.45 | 5.48 | 4.43 | 4.43 | YRI |
| ARL6IP4  | GI_8923906-A  | rs752164   | 12 | 122032694 | 40409  | 6.1126  | 0.3347 | 6.63 | 5.27 | 4.31 | 4.31 | YRI |
| ARNT     | GI_30795239-A | rs3754210  | 1  | 147767334 | 171977 | 6.0623  | 0.3322 | 7.27 | 5.56 | 4.31 | 4.31 | YRI |
| ARPC3    | GI_23397667-S | rs2338754  | 12 | 108954453 | 381233 | 9.2891  | 0.4862 | 9.29 | 7.17 | 5.25 | 5.25 | YRI |

|               |               |            |    |           |        |         |        |      |      |      |      |     |
|---------------|---------------|------------|----|-----------|--------|---------|--------|------|------|------|------|-----|
| ARTS-1        | GI_20149636-S | rs7063     | 5  | 96135967  | 7329   | 7.7118  | 0.4122 | 6.48 | 5.62 | 4.55 | 4.55 | YRI |
| ASAH1         | GI_30794501-S | rs13138223 | 4  | 77216794  | 17704  | 7.8376  | 0.4179 | 6.13 | 5.81 | 4.68 | 4.68 | YRI |
| ASRGL1        | GI_23308566-S | rs1881535  | 11 | 61878199  | 38117  | 6.4002  | 0.3493 | 6.58 | 5.72 | 4.52 | 4.52 | YRI |
| ATPAF2        | GI_22538424-S | rs8067146  | 17 | 17865681  | 3232   | 12.6738 | 0.6013 | 9.53 | 6.93 | 5.19 | 5.19 | YRI |
| ATPIF1        | GI_30260191-I | rs8559     | 1  | 28248394  | 18     | 10.0533 | 0.5103 | 7.7  | 5.3  | 4.36 | 4.36 | YRI |
| AXIN1         | GI_31083143-A | rs393521   | 16 | 277679    | 20     | 19.5993 | 0.769  | 7.36 | 5.6  | 4.47 | 4.47 | YRI |
| B3GTL         | GI_34996530-S | rs912603   | 13 | 30803641  | 86     | 6.4779  | 0.3532 | 7.19 | 6.33 | 4.93 | 4.93 | YRI |
| BBP           | GI_17738309-S | rs1390450  | 1  | 61852409  | 26242  | 8.0271  | 0.4265 | 8    | 5.55 | 4.59 | 4.59 | YRI |
| BFSP2         | GI_21536442-S | rs2737717  | 3  | 134668532 | 8193   | 12.6396 | 0.6002 | 6.48 | 5.35 | 4.49 | 4.49 | YRI |
| BIK           | GI_21536418-S | rs4988394  | 22 | 41840631  | 9407   | 6.4821  | 0.3534 | 7.48 | 5.77 | 4.86 | 4.86 | YRI |
| C10orf26      | GI_41152103-S | rs619824   | 10 | 104571278 | 6897   | 6.035   | 0.3308 | 6.59 | 5.1  | 4.22 | 4.22 | YRI |
| C10orf88      | GI_13376420-S | rs4980169  | 10 | 124682576 | 1441   | 6.4851  | 0.3536 | 6.4  | 5.56 | 4.48 | 4.48 | YRI |
| C11orf17      | GI_21361869-A | rs3751068  | 11 | 8903526   | 5796   | 8.5674  | 0.4501 | 6.74 | 5.96 | 4.69 | 4.69 | YRI |
| C11orf21      | GI_7662662-S  | rs2074021  | 11 | 2280104   | 6337   | 9.8504  | 0.5086 | 7.51 | 5.4  | 4.56 | 4.56 | YRI |
| C14orf118     | GI_40018643-A | rs10498533 | 14 | 75719885  | 18542  | 6.9681  | 0.3773 | 6.97 | 6.25 | 4.87 | 4.87 | YRI |
| C14orf122     | GI_34222327-S | rs8010715  | 14 | 23678987  | 865    | 9.2963  | 0.4805 | 6.92 | 5.85 | 4.62 | 4.62 | YRI |
| C14orf52      | GI_21553312-S | rs4902332  | 14 | 64445731  | 25025  | 29.4466 | 0.8941 | 7.51 | 5.55 | 4.48 | 4.48 | YRI |
| C1QTNF3       | GI_13569918-I | rs6546     | 5  | 34055787  | 28     | 5.4116  | 0.2979 | 6.52 | 5.41 | 4.48 | 4.48 | YRI |
| C20orf22      | GI_34147330-S | rs2500405  | 20 | 25308826  | 85217  | 7.1709  | 0.387  | 7.34 | 5.67 | 4.49 | 4.49 | YRI |
| C21orf56      | GI_23346426-S | rs8133082  | 21 | 46424341  | 18815  | 11.2751 | 0.555  | 9.88 | 7.09 | 5.25 | 5.25 | YRI |
| C22orf2       | GI_21359898-S | rs6519132  | 22 | 37395422  | 1315   | 8.9167  | 0.4648 | 6.6  | 5.75 | 4.66 | 4.66 | YRI |
| C2orf3        | GI_44890064-S | rs7573143  | 2  | 75916040  | 112738 | 6.1797  | 0.3382 | 8.15 | 5.71 | 4.62 | 4.62 | YRI |
| C6orf18       | GI_40538792-S | rs1265115  | 6  | 31225054  | 6322   | 8.1259  | 0.4308 | 6.41 | 5.46 | 4.55 | 4.55 | YRI |
| C7orf13       | GI_14249145-S | rs4716437  | 7  | 155941511 | 10578  | 7.8064  | 0.4221 | 7.28 | 6.08 | 4.76 | 4.76 | YRI |
| C8orf5        | GI_33300646-S | rs13266785 | 8  | 11026931  | 23900  | 9.181   | 0.4758 | 7.21 | 5.95 | 4.62 | 4.62 | YRI |
| CAPZA1        | GI_5453596-S  | rs1238     | 1  | 112926139 | 10     | 13.1743 | 0.6167 | 6.44 | 5.44 | 4.5  | 4.5  | YRI |
| CATSPER2      | GI_26051226-A | rs8033995  | 15 | 41800801  | 81600  | 5.5627  | 0.306  | 7.53 | 5.38 | 4.4  | 4.4  | YRI |
| CBR1          | GI_4502598-S  | rs735142   | 21 | 36382034  | 15101  | 7.0623  | 0.3818 | 8.34 | 6.38 | 5.13 | 5.13 | YRI |
| CCNDBP1       | GI_16554567-I | rs540587   | 15 | 41265405  | 204    | 17.8037 | 0.7338 | 7.95 | 5.64 | 4.31 | 4.31 | YRI |
| CD151         | GI_34328914-A | rs7924806  | 11 | 823668    | 5075   | 8.3962  | 0.4484 | 6.76 | 5.63 | 4.57 | 4.57 | YRI |
| CDK5RAP2      | GI_28872785-S | rs7037806  | 9  | 120230679 | 159    | 15.3291 | 0.6893 | 12.3 | 6.13 | 4.91 | 4.91 | YRI |
| CGI-49        | GI_7705766-S  | rs12409066 | 1  | 243273590 | 16646  | 7.9931  | 0.4249 | 7.89 | 5.72 | 4.62 | 4.62 | YRI |
| CGI-62        | GI_7705774-S  | rs1384804  | 8  | 79734777  | 55274  | 14.0392 | 0.6419 | 6.61 | 5.57 | 4.57 | 4.57 | YRI |
| CHKL          | GI_23238259-I | rs2269383  | 22 | 49302919  | 4660   | 11.2416 | 0.5538 | 7.55 | 5.5  | 4.33 | 4.33 | YRI |
| CHPT1         | GI_9910383-S  | rs2695281  | 12 | 100592467 | 26964  | 7.4853  | 0.4018 | 6.99 | 5.82 | 4.73 | 4.73 | YRI |
| CLECSF2       | GI_37577106-S | rs33871    | 12 | 9899164   | 2709   | 5.8728  | 0.3223 | 7.03 | 5.8  | 4.84 | 4.84 | YRI |
| CML66         | GI_31377641-S | rs6469251  | 8  | 110374265 | 51746  | 6.3531  | 0.347  | 6.49 | 5.37 | 4.48 | 4.48 | YRI |
| COPG2         | GI_6912319-S  | rs7803211  | 7  | 129748552 | 8004   | 6.5118  | 0.3599 | 7.31 | 5.53 | 4.63 | 4.63 | YRI |
| CORO2A        | GI_34335234-A | rs10985382 | 9  | 98039087  | 72632  | 7.6742  | 0.4105 | 6.84 | 5.95 | 4.78 | 4.78 | YRI |
| CP110         | GI_34222317-S | rs2256152  | 16 | 19417101  | 54945  | 5.6542  | 0.3108 | 6.72 | 5.61 | 4.56 | 4.56 | YRI |
| CPNE1         | GI_23397697-A | rs6060535  | 20 | 33698936  | 21264  | 6.7617  | 0.3673 | 8    | 6.12 | 4.83 | 4.83 | YRI |
| CRYBB2        | GI_4503062-S  | rs760554   | 22 | 24197146  | 244817 | 14.9274 | 0.6661 | 8.16 | 6.73 | 5.45 | 5.45 | YRI |
| CSNK1D        | GI_20544143-A | rs7215409  | 17 | 77788066  | 7554   | 8.74    | 0.4633 | 6.88 | 5.55 | 4.5  | 4.5  | YRI |
| CWF19L2       | GI_22748918-S | rs17106965 | 11 | 106829010 | 126524 | 6.1727  | 0.3378 | 6.67 | 5.75 | 4.64 | 4.64 | YRI |
| DAPK3         | GI_4557510-S  | rs2278438  | 19 | 3915106   | 5361   | 7.5391  | 0.4043 | 6.26 | 5.69 | 4.57 | 4.57 | YRI |
| DDB2          | GI_4557514-S  | rs7129661  | 11 | 47225120  | 7999   | 5.9239  | 0.3297 | 6.37 | 5.31 | 4.23 | 4.23 | YRI |
| DDHD1         | GI_37545942-S | rs8003676  | 14 | 52567792  | 15549  | 7.9176  | 0.4215 | 6.36 | 5.78 | 4.68 | 4.68 | YRI |
| DDX17         | GI_38201709-I | rs6001137  | 22 | 37199993  | 15210  | 6.4061  | 0.3496 | 7.25 | 5.99 | 4.8  | 4.8  | YRI |
| DERP6         | GI_44662825-I | rs222843   | 17 | 7086705   | 9736   | 13.4402 | 0.6246 | 7.83 | 6.02 | 4.87 | 4.87 | YRI |
| DGUOK         | GI_18426964-I | rs6737156  | 2  | 74071389  | 45     | 5.6413  | 0.3102 | 6.65 | 5.63 | 4.56 | 4.56 | YRI |
| DHX34         | GI_38158021-A | rs2694561  | 19 | 52552328  | 25290  | 9.4543  | 0.4868 | 6.84 | 5.62 | 4.52 | 4.52 | YRI |
| DIABLO        | GI_42544196-A | rs3809116  | 12 | 121240415 | 23199  | 6.4417  | 0.3514 | 7.22 | 5.93 | 4.68 | 4.68 | YRI |
| DKFZP434F0318 | GI_13540611-S | rs10845611 | 12 | 12743649  | 91824  | 8.9171  | 0.4958 | 7.1  | 6    | 4.79 | 4.79 | YRI |
| DKFZp434H247  | GI_37552078-S | rs1057745  | 19 | 44580230  | 174    | 6.1158  | 0.3349 | 7.23 | 5.53 | 4.54 | 4.54 | YRI |
| DKFZp761A078  | GI_35038600-S | rs6660019  | 1  | 100262466 | 933    | 8.1766  | 0.4331 | 6.44 | 5.78 | 4.56 | 4.56 | YRI |
| DMXL1         | GI_21536473-S | rs3943550  | 5  | 118364004 | 248432 | 8.4472  | 0.4565 | 7.47 | 5.78 | 4.56 | 4.56 | YRI |

|          |               |            |    |           |        |         |        |      |      |      |      |     |
|----------|---------------|------------|----|-----------|--------|---------|--------|------|------|------|------|-----|
| DNA2L    | GI_37551214-S | rs10823224 | 10 | 69960835  | 116726 | 6.2692  | 0.3427 | 6.11 | 5.61 | 4.47 | 4.47 | YRI |
| DPYSL4   | GI_11321616-S | rs10781563 | 10 | 133858802 | 10364  | 7.5548  | 0.405  | 6.95 | 5.62 | 4.62 | 4.62 | YRI |
| DTNB     | GI_37577100-A | rs7571570  | 2  | 25533181  | 21376  | 6.5759  | 0.3581 | 6.43 | 5.66 | 4.46 | 4.46 | YRI |
| EBRP     | GI_14211872-S | rs3809325  | 13 | 49164110  | 30844  | 5.6843  | 0.3124 | 6.64 | 5.36 | 4.46 | 4.46 | YRI |
| EIF2S1   | GI_34147492-S | rs8009318  | 14 | 66762525  | 159008 | 16.1416 | 0.6965 | 6.04 | 5.16 | 4.35 | 4.35 | YRI |
| ETAA16   | GI_37059813-S | rs923184   | 2  | 67541609  | 2435   | 18.0932 | 0.7398 | 10.4 | 7.25 | 5.62 | 5.62 | YRI |
| FANCA    | GI_4503654-S  | rs2159113  | 16 | 88359584  | 27924  | 7.4698  | 0.4011 | 5.87 | 5.5  | 4.5  | 4.5  | YRI |
| FKBP1A   | GI_17149835-I | rs6041749  | 20 | 1298672   | 1831   | 11.4884 | 0.5624 | 8.36 | 6.1  | 4.94 | 4.94 | YRI |
| FKBP9    | GI_33469984-S | rs6976843  | 7  | 32876543  | 57278  | 5.8483  | 0.3257 | 6.5  | 5.58 | 4.56 | 4.56 | YRI |
| FLJ10300 | GI_21361686-S | rs2657381  | 7  | 158150563 | 87408  | 7.1709  | 0.387  | 7.06 | 5.61 | 4.48 | 4.48 | YRI |
| FLJ10305 | GI_39780551-S | rs8058702  | 16 | 69359737  | 80738  | 6.0308  | 0.3305 | 6.54 | 5.65 | 4.38 | 4.38 | YRI |
| FLJ10375 | GI_27545335-S | rs2036617  | 3  | 43364243  | 18807  | 7.1665  | 0.3921 | 7.1  | 6.05 | 4.6  | 4.6  | YRI |
| FLJ10525 | GI_8922490-S  | rs1983138  | 4  | 41742296  | 56347  | 7.2325  | 0.3899 | 6.63 | 5.81 | 4.62 | 4.62 | YRI |
| FLJ10891 | GI_8922743-S  | rs544769   | 19 | 57776173  | 3121   | 8.7523  | 0.4579 | 7.48 | 5.78 | 4.64 | 4.64 | YRI |
| FLJ10986 | GI_21361729-S | rs7528596  | 1  | 59523609  | 328172 | 6.634   | 0.3766 | 7.37 | 5.76 | 4.77 | 4.77 | YRI |
| FLJ11730 | GI_40255019-S | rs4653296  | 1  | 37647866  | 19389  | 5.8292  | 0.3201 | 7.17 | 5.35 | 4.57 | 4.57 | YRI |
| FLJ11838 | GI_13375918-S | rs10493111 | 1  | 42536366  | 58450  | 7.9949  | 0.425  | 11.2 | 7.35 | 5.62 | 5.62 | YRI |
| FLJ12785 | GI_31542679-S | rs2245231  | 20 | 36829534  | 4543   | 6.1923  | 0.3388 | 7.82 | 5.46 | 4.53 | 4.53 | YRI |
| FLJ13491 | GI_13375845-S | rs752164   | 12 | 122032694 | 43354  | 10.1615 | 0.5144 | 6.27 | 5.5  | 4.36 | 4.36 | YRI |
| FLJ14753 | GI_14211858-S | rs7046779  | 9  | 94290447  | 11996  | 22.0397 | 0.8095 | 7.94 | 6.53 | 5.1  | 5.1  | YRI |
| FLJ20291 | GI_34147582-S | rs7214654  | 17 | 34225779  | 14625  | 8.707   | 0.456  | 6.37 | 5.25 | 4.31 | 4.31 | YRI |
| FLJ20542 | GI_39725639-I | rs307347   | 1  | 1300683   | 13598  | 5.8651  | 0.3363 | 6.52 | 5.14 | 4.01 | 4.01 | YRI |
| FLJ20635 | GI_8923587-S  | rs1473953  | 22 | 44038578  | 18513  | 20.1125 | 0.7782 | 11.1 | 8.6  | 6.63 | 6.63 | YRI |
| FLJ20699 | GI_8923627-S  | rs6008553  | 22 | 45008840  | 1414   | 16.4232 | 0.7032 | 6.92 | 5.85 | 4.88 | 4.88 | YRI |
| FLJ20920 | GI_31542719-S | rs7627     | 17 | 45907153  | 3      | 13.9029 | 0.638  | 8    | 5.65 | 4.56 | 4.56 | YRI |
| FLJ21347 | GI_31542722-S | rs1122634  | 17 | 45976364  | 11803  | 11.5116 | 0.5695 | 7.23 | 6.11 | 4.76 | 4.76 | YRI |
| FLJ21613 | GI_39725954-S | rs2297002  | 9  | 85880924  | 14471  | 6.3742  | 0.348  | 6.73 | 5.71 | 4.75 | 4.75 | YRI |
| FLJ21616 | GI_13375737-S | rs10088428 | 8  | 28965442  | 421    | 20.0691 | 0.7774 | 5.98 | 5.41 | 4.6  | 4.6  | YRI |
| FLJ21945 | GI_13376797-S | rs1115856  | 2  | 24288282  | 124177 | 6.0549  | 0.3318 | 6.58 | 5.73 | 4.46 | 4.46 | YRI |
| FLJ22374 | GI_39752638-S | rs11768076 | 7  | 30602279  | 102848 | 5.8931  | 0.3281 | 7.15 | 5.73 | 4.66 | 4.66 | YRI |
| FLJ22494 | GI_40254968-S | rs7836362  | 8  | 22026371  | 5905   | 6.6754  | 0.363  | 7.45 | 5.51 | 4.6  | 4.6  | YRI |
| FLJ22875 | GI_34147465-S | rs3887731  | 15 | 62185229  | 33047  | 5.6855  | 0.3125 | 7.07 | 5.47 | 4.43 | 4.43 | YRI |
| FLJ23235 | GI_13376422-S | rs2711981  | 4  | 38861824  | 70782  | 9.6239  | 0.4936 | 7.27 | 5.83 | 4.57 | 4.57 | YRI |
| FLJ30435 | GI_31340828-S | rs6606188  | 9  | 65018691  | 51597  | 5.0882  | 0.2803 | 4.62 | 3.49 | 2.59 | 2.59 | YRI |
| FLJ32112 | GI_23308504-S | rs11206284 | 1  | 54290679  | 13575  | 14.4056 | 0.652  | 6.52 | 6.05 | 4.71 | 4.71 | YRI |
| FLJ32871 | GI_21389568-S | rs2541513  | 16 | 10668135  | 39119  | 8.2706  | 0.4372 | 8.93 | 7    | 5.37 | 5.37 | YRI |
| FLJ34443 | GI_31341870-S | rs7656122  | 4  | 1362872   | 16515  | 6.0474  | 0.3314 | 7.22 | 5.3  | 4.43 | 4.43 | YRI |
| FLJ34790 | GI_27734741-S | rs7210250  | 17 | 8067534   | 2540   | 5.5232  | 0.3039 | 6.65 | 5.45 | 4.5  | 4.5  | YRI |
| FLJ35867 | GI_31542776-S | rs2242069  | 15 | 41500926  | 60332  | 6.6388  | 0.3612 | 5.92 | 5.21 | 4.21 | 4.21 | YRI |
| FLJ39616 | GI_34594658-S | rs2285727  | 12 | 110555798 | 184736 | 5.6326  | 0.3097 | 6.81 | 5.55 | 4.4  | 4.4  | YRI |
| FLJ46603 | GI_38348363-S | rs237059   | 17 | 72242438  | 54929  | 8.0762  | 0.4286 | 6.34 | 5.7  | 4.47 | 4.47 | YRI |
| FLJ90036 | GI_31559781-S | rs6599293  | 4  | 123027    | 22841  | 15.9641 | 0.6923 | 8.54 | 5.97 | 4.45 | 4.45 | YRI |
| FTHFSDC1 | GI_40018634-S | rs2295733  | 6  | 151514814 | 119    | 11.8974 | 0.5826 | 6.37 | 5.64 | 4.6  | 4.6  | YRI |
| GOT2     | GI_4504068-S  | rs8060056  | 16 | 57308344  | 9602   | 5.9865  | 0.3282 | 6.48 | 5.35 | 4.51 | 4.51 | YRI |
| GPR63    | GI_13540556-S | rs2143392  | 6  | 97280526  | 72571  | 5.7743  | 0.3172 | 6.72 | 5.71 | 4.54 | 4.54 | YRI |
| GSG2     | GI_13994373-S | rs2976230  | 17 | 3577990   | 1525   | 5.618   | 0.3134 | 6.3  | 5.52 | 4.57 | 4.57 | YRI |
| GSTM1    | GI_23065546-A | rs366732   | 1  | 109935049 | 8911   | 24.6872 | 0.8455 | 7.06 | 6.35 | 4.91 | 4.91 | YRI |
| GSTM2    | GI_23065549-S | rs366732   | 1  | 109935049 | 8831   | 8.7697  | 0.4587 | 6.04 | 5.44 | 4.56 | 4.56 | YRI |
| GSTO1    | GI_4758483-S  | rs12244332 | 10 | 106010130 | 6998   | 6.8934  | 0.3737 | 6.56 | 5.91 | 4.85 | 4.85 | YRI |
| GSTT1    | GI_4504184-S  | rs407257   | 22 | 22671104  | 29852  | 6.2196  | 0.3402 | 7.03 | 6.08 | 4.83 | 4.83 | YRI |
| GTF2H3   | GI_28376643-S | rs6488889  | 12 | 122669673 | 317    | 6.2135  | 0.3399 | 6.47 | 5.56 | 4.46 | 4.46 | YRI |
| HABP4    | GI_24307946-S | rs10820666 | 9  | 96314552  | 17381  | 8.9645  | 0.4668 | 6.92 | 5.51 | 4.58 | 4.58 | YRI |
| HAPLN3   | GI_32455240-S | rs2280467  | 15 | 87218242  | 3448   | 6.4666  | 0.3576 | 7.21 | 5.81 | 4.69 | 4.69 | YRI |
| HEBP2    | GI_41393567-S | rs6570232  | 6  | 138771357 | 2507   | 17.1071 | 0.7188 | 8.81 | 6.45 | 4.96 | 4.96 | YRI |
| HEMK     | GI_7705408-S  | rs2239752  | 3  | 50620417  | 23173  | 10.6541 | 0.5328 | 6.93 | 5.39 | 4.14 | 4.14 | YRI |
| HERC2    | GI_5729867-S  | rs4778244  | 15 | 26029944  | 2      | 19.6852 | 0.7765 | 6.73 | 5.51 | 4.38 | 4.38 | YRI |

|           |               |            |    |           |        |         |        |      |      |      |      |     |
|-----------|---------------|------------|----|-----------|--------|---------|--------|------|------|------|------|-----|
| HHLA3     | GI_5901965-S  | rs2151540  | 1  | 70620478  | 87756  | 14.6643 | 0.6591 | 9.45 | 7.45 | 5.48 | 5.48 | YRI |
| HIBADH    | GI_41393565-S | rs1014373  | 7  | 27344333  | 5242   | 7.8698  | 0.4194 | 6.88 | 5.91 | 4.86 | 4.86 | YRI |
| HLA-DQA1  | GI_18426974-S | rs9275141  | 6  | 32759095  | 40260  | 7.9847  | 0.4302 | 7.81 | 5.72 | 4.57 | 4.57 | YRI |
| HLA-DQB1  | GI_24797068-S | rs6457663  | 6  | 32847290  | 111440 | 6.1708  | 0.3377 | 6.85 | 5.56 | 4.37 | 4.37 | YRI |
| HLA-DRB5  | GI_26665892-S | rs9268614  | 6  | 32510756  | 82469  | 6.2242  | 0.3404 | 7.46 | 5.43 | 4.43 | 4.43 | YRI |
| hmm13275  | hmm13275-S    | rs7663568  | 4  | 89765780  | 45194  | 5.7034  | 0.3135 | 6.16 | 5.54 | 4.57 | 4.57 | YRI |
| hmm1412   | hmm1412-S     | rs4944950  | 11 | 74159279  | 70636  | 19.2112 | 0.7618 | 9.89 | 6.33 | 4.95 | 4.95 | YRI |
| hmm19532  | hmm19532-S    | rs3120272  | 10 | 43511620  | 6616   | 6.4354  | 0.3511 | 6.99 | 5.63 | 4.58 | 4.58 | YRI |
| hmm25128  | hmm25128-S    | rs8100253  | 19 | 63779291  | 10162  | 6.955   | 0.3767 | 6.43 | 5.4  | 4.24 | 4.24 | YRI |
| hmm28369  | hmm28369-S    | rs10803576 | 2  | 132090707 | 6383   | 7.5165  | 0.4032 | 8.57 | 6.19 | 4.82 | 4.82 | YRI |
| hmm31752  | hmm31752-S    | rs2844665  | 6  | 31114834  | 17244  | 9.2485  | 0.4785 | 7.22 | 5.97 | 4.76 | 4.76 | YRI |
| hmm31999  | hmm31999-S    | rs6570064  | 6  | 99989858  | 9454   | 10.252  | 0.5179 | 8.42 | 5.69 | 4.62 | 4.62 | YRI |
| hmm35174  | hmm35174-S    | rs3942977  | 8  | 142614039 | 193461 | 5.8359  | 0.3204 | 6.71 | 5.78 | 4.73 | 4.73 | YRI |
| hmm5445   | hmm5445-S     | rs883416   | 17 | 30594554  | 24000  | 10.2431 | 0.5175 | 6.96 | 6.28 | 5.02 | 5.02 | YRI |
| hmm8232   | hmm8232-S     | rs1057535  | 1  | 46527918  | 11826  | 16.3241 | 0.7009 | 9.24 | 6.82 | 4.8  | 4.8  | YRI |
| hmm9596   | hmm9596-S     | rs4142416  | 20 | 7940324   | 29949  | 7.0063  | 0.3791 | 6.77 | 5.97 | 4.76 | 4.76 | YRI |
| Hs.118609 | Hs.118609-S   | rs12083302 | 1  | 53515660  | 1116   | 6.2258  | 0.3405 | 6.76 | 5.88 | 4.67 | 4.67 | YRI |
| Hs.11898  | Hs.11898-S    | rs8036979  | 15 | 50735287  | 1343   | 5.9735  | 0.3276 | 7.52 | 5.72 | 4.6  | 4.6  | YRI |
| Hs.146747 | Hs.146747-S   | rs3218619  | 10 | 90752781  | 13687  | 7.9124  | 0.4213 | 7.37 | 6.17 | 4.89 | 4.89 | YRI |
| Hs.150050 | Hs.150050-S   | rs760554   | 22 | 24197146  | 44163  | 15.405  | 0.6784 | 7.06 | 6.1  | 4.94 | 4.94 | YRI |
| Hs.158943 | Hs.158943-S   | rs7740062  | 6  | 27813577  | 25098  | 27.2925 | 0.8743 | 7.02 | 5.76 | 4.57 | 4.57 | YRI |
| Hs.208685 | Hs.208685-S   | rs980962   | 6  | 27468987  | 10192  | 7.5477  | 0.4047 | 7.05 | 5.27 | 4.29 | 4.29 | YRI |
| Hs.211939 | Hs.211939-S   | rs6663688  | 1  | 10558581  | 13923  | 7.2539  | 0.3909 | 6.97 | 5.36 | 4.51 | 4.51 | YRI |
| Hs.212658 | Hs.212658-S   | rs4699634  | 4  | 99721799  | 127    | 7.8687  | 0.4193 | 8.26 | 5.92 | 4.64 | 4.64 | YRI |
| Hs.224849 | Hs.224849-S   | rs1901     | 3  | 14687477  | 8756   | 10.9891 | 0.5449 | 7.73 | 5.74 | 4.69 | 4.69 | YRI |
| Hs.26039  | Hs.26039-S    | rs3733758  | 5  | 10708842  | 1145   | 10.9852 | 0.5448 | 6.35 | 5.41 | 4.65 | 4.65 | YRI |
| Hs.28465  | Hs.28465-S    | rs9285280  | 13 | 72204160  | 23252  | 8.6045  | 0.4887 | 6.5  | 5.56 | 4.68 | 4.68 | YRI |
| Hs.304334 | Hs.304334-S   | rs4899260  | 14 | 68347957  | 4012   | 13.9597 | 0.6396 | 7.17 | 5.75 | 4.68 | 4.68 | YRI |
| Hs.311038 | Hs.311038-S   | rs16944716 | 15 | 89006612  | 2197   | 7.4724  | 0.4066 | 8.82 | 6.33 | 5.13 | 5.13 | YRI |
| Hs.333492 | Hs.333492-S   | rs11155589 | 6  | 149069059 | 270269 | 5.6595  | 0.3111 | 6.95 | 5.53 | 4.71 | 4.71 | YRI |
| Hs.345389 | Hs.345389-S   | rs760554   | 22 | 24197146  | 28424  | 12.7581 | 0.6039 | 9.97 | 7.08 | 5.39 | 5.39 | YRI |
| Hs.379903 | Hs.379903-S   | rs1045599  | 17 | 15820635  | 55     | 13.8534 | 0.6366 | 6.83 | 5.85 | 4.63 | 4.63 | YRI |
| Hs.39429  | Hs.39429-S    | rs2948     | 12 | 16078899  | 111    | 9.9517  | 0.5064 | 7.59 | 5.73 | 4.57 | 4.57 | YRI |
| Hs.396207 | Hs.396207-S   | rs1084086  | 1  | 45710193  | 62801  | 15.3663 | 0.6774 | 7.97 | 6.35 | 4.62 | 4.62 | YRI |
| Hs.400876 | Hs.400876-S   | rs752774   | 20 | 36488429  | 5644   | 19.8194 | 0.773  | 6.9  | 5.55 | 4.5  | 4.5  | YRI |
| Hs.402723 | Hs.402723-S   | rs2073576  | 9  | 35058948  | 1842   | 9.8584  | 0.5028 | 7.18 | 5.81 | 4.56 | 4.56 | YRI |
| Hs.406038 | Hs.406038-S   | rs12116935 | 1  | 36458639  | 5110   | 6.1381  | 0.3361 | 6.86 | 5.88 | 4.68 | 4.68 | YRI |
| Hs.421238 | Hs.421238-S   | rs4925715  | 1  | 243614510 | 3099   | 11.5789 | 0.5655 | 7.1  | 5.97 | 4.77 | 4.77 | YRI |
| Hs.42217  | Hs.42217-S    | rs9328707  | 16 | 45716367  | 257579 | 8.6114  | 0.4824 | 8.66 | 5.36 | 4.29 | 4.29 | YRI |
| Hs.42805  | Hs.42805-S    | rs3741526  | 12 | 130906571 | 3582   | 7.6392  | 0.4089 | 9.03 | 6.67 | 5.11 | 5.11 | YRI |
| Hs.43687  | Hs.43687-S    | rs6586     | 9  | 97746486  | 2916   | 12.7435 | 0.6034 | 6.65 | 5.77 | 4.73 | 4.73 | YRI |
| Hs.453941 | Hs.453941-S   | rs880033   | 8  | 119702375 | 105019 | 15.4351 | 0.6855 | 9.22 | 7.82 | 6    | 6    | YRI |
| Hs.460359 | Hs.460359-S   | rs6497694  | 16 | 23802234  | 10061  | 6.5707  | 0.3629 | 7.18 | 6.35 | 5    | 5    | YRI |
| Hs.473309 | Hs.473309-S   | rs2427554  | 20 | 62020009  | 3031   | 5.7424  | 0.3155 | 6.57 | 5.67 | 4.35 | 4.35 | YRI |
| Hs.482037 | Hs.482037-S   | rs7716564  | 5  | 43537149  | 14117  | 11.1495 | 0.5506 | 7.45 | 6.06 | 4.54 | 4.54 | YRI |
| Hs.483613 | Hs.483613-S   | rs10036567 | 5  | 141288017 | 4486   | 8.0035  | 0.4254 | 6.62 | 5.84 | 4.52 | 4.52 | YRI |
| Hs.510003 | Hs.510003-S   | rs3741600  | 12 | 67440272  | 8299   | 12.9498 | 0.6098 | 6.41 | 5.59 | 4.71 | 4.71 | YRI |
| Hs.519704 | Hs.519704-S   | rs4262087  | 5  | 156995295 | 34858  | 8.2843  | 0.4435 | 7.51 | 6.56 | 5.25 | 5.25 | YRI |
| Hs.519979 | Hs.519979-S   | rs2523971  | 6  | 30046237  | 40891  | 15.0537 | 0.6694 | 7.11 | 6.17 | 4.68 | 4.68 | YRI |
| Hs.98028  | Hs.98028-S    | rs646521   | 11 | 124183151 | 1184   | 6.8451  | 0.3713 | 6.15 | 5.58 | 4.57 | 4.57 | YRI |
| HSCARG    | GI_24476001-S | rs7191458  | 16 | 4451753   | 128    | 10.1827 | 0.5152 | 6.63 | 5.78 | 4.61 | 4.61 | YRI |
| HSD17B12  | GI_7705854-S  | rs7131110  | 11 | 43803426  | 31055  | 10.2791 | 0.5189 | 6.07 | 5.41 | 4.66 | 4.66 | YRI |
| HSF2BP    | GI_5901979-S  | rs1836856  | 21 | 43789066  | 15271  | 8.5058  | 0.4474 | 7.31 | 6.24 | 4.82 | 4.82 | YRI |
| HSPC157   | GI_7661813-S  | rs1883421  | 1  | 22101946  | 853    | 6.8397  | 0.3711 | 7.17 | 6    | 4.69 | 4.69 | YRI |
| INADL     | GI_29029547-I | rs10889286 | 1  | 62298119  | 5635   | 5.7868  | 0.3224 | 6.76 | 5.44 | 4.6  | 4.6  | YRI |
| IPP       | GI_5174472-S  | rs780954   | 1  | 45708170  | 125665 | 6.8718  | 0.3778 | 6.79 | 5.3  | 4.32 | 4.32 | YRI |

|           |               |            |    |           |        |         |        |      |      |      |      |     |
|-----------|---------------|------------|----|-----------|--------|---------|--------|------|------|------|------|-----|
| IRF5      | GI_38683858-A | rs10239340 | 7  | 128262461 | 79319  | 20.6223 | 0.787  | 6.5  | 5.45 | 4.49 | 4.49 | YRI |
| JFC1      | GI_14249613-S | rs10751722 | 1  | 27227665  | 136738 | 5.21    | 0.287  | 6.72 | 5.17 | 4.33 | 4.33 | YRI |
| KIAA0089  | GI_34222096-S | rs748607   | 3  | 32123720  | 61182  | 5.8892  | 0.3479 | 6.35 | 5.72 | 4.58 | 4.58 | YRI |
| KIAA0415  | GI_37538331-S | rs7810433  | 7  | 4590701   | 16508  | 6.957   | 0.3768 | 6.83 | 5.45 | 4.55 | 4.55 | YRI |
| KIAA0748  | GI_7662281-S  | rs11171192 | 12 | 53634959  | 6538   | 6.9816  | 0.378  | 8.51 | 6.58 | 5.06 | 5.06 | YRI |
| KIAA0972  | GI_7662423-S  | rs12115682 | 9  | 96516889  | 80951  | 7.9844  | 0.4245 | 7.63 | 6.12 | 4.7  | 4.7  | YRI |
| KIAA1274  | GI_22050996-S | rs1871595  | 10 | 71910576  | 87462  | 11.8543 | 0.5748 | 6.37 | 6    | 4.7  | 4.7  | YRI |
| KIAA1463  | GI_39930390-S | rs11169520 | 12 | 49359790  | 65125  | 27.7457 | 0.9008 | 11.9 | 8.3  | 5.47 | 5.47 | YRI |
| KIAA1712  | GI_30794213-S | rs7658307  | 4  | 175581254 | 46804  | 15.0871 | 0.6702 | 7.51 | 5.87 | 4.81 | 4.81 | YRI |
| KIAA1913  | GI_40538800-S | rs11154535 | 6  | 130605876 | 199758 | 6.1215  | 0.3352 | 6.38 | 6.06 | 4.96 | 4.96 | YRI |
| LCMT1     | GI_15082255-I | rs277886   | 16 | 25070005  | 96233  | 13.0016 | 0.6114 | 7.49 | 6.04 | 4.87 | 4.87 | YRI |
| LNK       | GI_4885454-S  | rs11831659 | 12 | 110318398 | 33409  | 8.7888  | 0.4713 | 6.43 | 5.24 | 4.38 | 4.38 | YRI |
| LOC114984 | GI_34147539-S | rs8055206  | 16 | 2872763   | 16451  | 6.1725  | 0.3378 | 6.66 | 5.52 | 4.54 | 4.54 | YRI |
| LOC119710 | GI_42476215-S | rs4151030  | 11 | 36552336  | 73862  | 9.5514  | 0.4907 | 7.11 | 5.72 | 4.57 | 4.57 | YRI |
| LOC120376 | GI_37540715-S | rs7126039  | 11 | 110716002 | 31452  | 6.0555  | 0.3318 | 6.81 | 5.56 | 4.59 | 4.59 | YRI |
| LOC126208 | GI_27485046-S | rs11673628 | 19 | 61314878  | 23994  | 9.1514  | 0.4746 | 7.69 | 6.53 | 5.13 | 5.13 | YRI |
| LOC133957 | GI_34222184-S | rs13474    | 5  | 258077    | 179    | 5.4333  | 0.2991 | 5.72 | 5.08 | 4.27 | 4.27 | YRI |
| LOC144404 | GI_37543220-S | rs3893308  | 12 | 120671212 | 7029   | 5.9414  | 0.3259 | 6.62 | 5.27 | 4.36 | 4.36 | YRI |
| LOC151963 | GI_31341922-S | rs2133864  | 3  | 194098959 | 101392 | 6.1281  | 0.3355 | 6.5  | 5.93 | 4.68 | 4.68 | YRI |
| LOC166867 | GI_27477322-S | rs2380953  | 4  | 37773414  | 2993   | 10.7596 | 0.5367 | 7.2  | 5.91 | 4.83 | 4.83 | YRI |
| LOC199777 | GI_21699081-S | rs8100147  | 19 | 20613255  | 6823   | 7.0682  | 0.3821 | 5.82 | 5.45 | 4.32 | 4.32 | YRI |
| LOC200933 | GI_37550262-S | rs9825103  | 3  | 197802521 | 9614   | 5.6874  | 0.3126 | 6.64 | 5.55 | 4.46 | 4.46 | YRI |
| LOC205251 | GI_28372544-S | rs10171646 | 2  | 110334732 | 7360   | 11.798  | 0.5729 | 6.17 | 5.09 | 4.03 | 4.03 | YRI |
| LOC221362 | GI_27498596-S | rs1000809  | 6  | 52643233  | 1873   | 7.3047  | 0.4276 | 7.14 | 5.67 | 4.76 | 4.76 | YRI |
| LOC222701 | GI_27498465-S | rs868987   | 6  | 28218127  | 27075  | 11.0949 | 0.5487 | 6.18 | 5.61 | 4.41 | 4.41 | YRI |
| LOC282956 | GI_27483210-S | rs2523467  | 6  | 31470909  | 358    | 12.4663 | 0.5947 | 6.37 | 5.47 | 4.47 | 4.47 | YRI |
| LOC283726 | GI_37540927-S | rs1267658  | 15 | 81011209  | 647257 | 12.0077 | 0.5799 | 6.75 | 5.87 | 4.7  | 4.7  | YRI |
| LOC284293 | GI_27485378-S | rs8090046  | 18 | 59773066  | 1480   | 25.975  | 0.8748 | 7.06 | 5.81 | 4.77 | 4.77 | YRI |
| LOC285256 | GI_27481220-S | rs6775459  | 3  | 130025163 | 1857   | 7.2725  | 0.3918 | 6.56 | 5.67 | 4.55 | 4.55 | YRI |
| LOC285407 | GI_37550539-S | rs10934906 | 3  | 131295760 | 4314   | 10.1043 | 0.5123 | 6.61 | 5.78 | 4.7  | 4.7  | YRI |
| LOC286356 | GI_27478865-S | rs1046795  | 9  | 96734913  | 1163   | 17.0277 | 0.717  | 6.45 | 5.76 | 4.57 | 4.57 | YRI |
| LOC339229 | GI_41150782-S | rs7502869  | 17 | 77241821  | 974    | 8.2597  | 0.4424 | 8.16 | 5.79 | 4.58 | 4.58 | YRI |
| LOC339231 | GI_29739147-S | rs6565620  | 17 | 77268505  | 9568   | 7.1162  | 0.3844 | 7.25 | 5.66 | 4.57 | 4.57 | YRI |
| LOC339804 | GI_37546921-S | rs1729660  | 2  | 61277463  | 24478  | 15.4757 | 0.6802 | 6.95 | 5.7  | 4.48 | 4.48 | YRI |
| LOC340435 | GI_29735811-S | rs13252719 | 8  | 71897123  | 115196 | 15.8559 | 0.6896 | 7.16 | 6.04 | 4.91 | 4.91 | YRI |
| LOC346171 | GI_37552164-S | rs2535241  | 6  | 29748764  | 255    | 6.5169  | 0.3552 | 7.04 | 5.79 | 4.56 | 4.56 | YRI |
| LOC347981 | GI_30160064-S | rs1611527  | 6  | 29980936  | 18393  | 8.1017  | 0.4298 | 7.14 | 5.66 | 4.43 | 4.43 | YRI |
| LOC348094 | GI_38176293-S | rs871447   | 15 | 62957490  | 80324  | 13.706  | 0.6324 | 7.4  | 6.06 | 4.92 | 4.92 | YRI |
| LOC374421 | GI_37541454-S | rs1011993  | 11 | 93079070  | 23689  | 10.0331 | 0.5157 | 6.03 | 5.48 | 4.5  | 4.5  | YRI |
| LOC375097 | GI_37555934-S | rs752774   | 20 | 36488429  | 5495   | 18.7639 | 0.7533 | 7.08 | 5.69 | 4.53 | 4.53 | YRI |
| LOC375399 | GI_37540365-S | rs12640455 | 4  | 68387605  | 27870  | 7.652   | 0.4095 | 6.97 | 5.73 | 4.5  | 4.5  | YRI |
| LOC377696 | GI_37555914-S | rs2460970  | 8  | 119698635 | 36461  | 9.4405  | 0.4863 | 6.92 | 6.21 | 5.15 | 5.15 | YRI |
| LOC387647 | GI_42659552-S | rs4749424  | 10 | 29759251  | 6415   | 11.7515 | 0.5713 | 7.74 | 5.82 | 4.74 | 4.74 | YRI |
| LOC387905 | GI_41202581-S | rs7336525  | 13 | 20816844  | 20     | 6.7522  | 0.3668 | 7.64 | 5.96 | 4.78 | 4.78 | YRI |
| LOC388327 | GI_42661079-S | rs930526   | 17 | 6414077   | 82951  | 5.8439  | 0.3208 | 6.34 | 5.67 | 4.69 | 4.69 | YRI |
| LOC388673 | GI_41115452-S | rs10494258 | 1  | 146525817 | 136389 | 5.4268  | 0.2987 | 6.83 | 5.25 | 4.06 | 4.06 | YRI |
| LOC388918 | GI_42662524-S | rs131777   | 22 | 49281177  | 1293   | 6.183   | 0.3383 | 7.37 | 5.67 | 4.45 | 4.45 | YRI |
| LOC389338 | GI_41146997-S | rs10062143 | 5  | 151127235 | 2710   | 6.5797  | 0.3583 | 7.29 | 6.09 | 4.78 | 4.78 | YRI |
| LOC389362 | GI_41147302-S | rs1127477  | 6  | 3215509   | 2397   | 6.7462  | 0.3716 | 6.86 | 5.7  | 4.66 | 4.66 | YRI |
| LOC389366 | GI_42657574-S | rs12661484 | 6  | 10805426  | 25719  | 14.9709 | 0.6801 | 8.18 | 5.86 | 4.63 | 4.63 | YRI |
| LOC392620 | GI_41147689-S | rs1636264  | 7  | 2637827   | 102929 | 9.3645  | 0.4832 | 7.66 | 5.84 | 4.76 | 4.76 | YRI |
| LOC399818 | GI_42659420-S | rs7898003  | 10 | 126441375 | 4789   | 13.2517 | 0.619  | 6.46 | 5.96 | 4.69 | 4.69 | YRI |
| LOC399987 | GI_42660080-S | rs9300302  | 12 | 3737732   | 1669   | 10.253  | 0.5179 | 7.27 | 5.6  | 4.67 | 4.67 | YRI |
| LOC400051 | GI_42659981-S | rs2051993  | 12 | 66699945  | 1068   | 7.2433  | 0.3904 | 8.24 | 6.52 | 5.23 | 5.23 | YRI |
| LOC400571 | GI_42661084-S | rs8066665  | 17 | 7426576   | 198    | 8.0372  | 0.4269 | 6.52 | 5.57 | 4.7  | 4.7  | YRI |
| LOC400642 | GI_42661344-S | rs8576     | 18 | 5236398   | 47     | 7.5979  | 0.407  | 6.85 | 5.68 | 4.64 | 4.64 | YRI |

|           |               |            |    |           |        |         |        |      |      |      |      |     |
|-----------|---------------|------------|----|-----------|--------|---------|--------|------|------|------|------|-----|
| LOC400843 | GI_42662295-S | rs2275274  | 20 | 33320958  | 6878   | 9.7335  | 0.4979 | 6.23 | 5.4  | 4.35 | 4.35 | YRI |
| LOC401135 | GI_42657007-S | rs1048447  | 4  | 68312238  | 104593 | 9.1546  | 0.4747 | 7.57 | 5.97 | 4.74 | 4.74 | YRI |
| LOC401245 | GI_42657607-S | rs6900042  | 6  | 30397250  | 29769  | 7.8266  | 0.4174 | 6.52 | 5.9  | 4.62 | 4.62 | YRI |
| LOC402476 | GI_42658265-S | rs4723187  | 7  | 32476141  | 99082  | 11.3537 | 0.5641 | 7.64 | 6.04 | 4.85 | 4.85 | YRI |
| LOC402573 | GI_42658526-S | rs11761784 | 7  | 99684621  | 14384  | 6.0476  | 0.3361 | 7.03 | 5.51 | 4.3  | 4.3  | YRI |
| LOC51240  | GI_31377759-S | rs10210345 | 2  | 190444992 | 16000  | 8.2221  | 0.4351 | 6.95 | 5.33 | 4.54 | 4.54 | YRI |
| LOC51693  | GI_7706428-S  | rs3784879  | 16 | 87441447  | 13502  | 7.3548  | 0.3957 | 7.7  | 5.58 | 4.62 | 4.62 | YRI |
| LOC87769  | GI_34147452-S | rs2760307  | 13 | 99988330  | 6353   | 7.7258  | 0.4129 | 6.99 | 6.07 | 4.9  | 4.9  | YRI |
| LOC90693  | GI_40255028-S | rs12700451 | 7  | 23421954  | 34029  | 6.4554  | 0.3521 | 8.25 | 5.8  | 4.78 | 4.78 | YRI |
| LOC93349  | GI_20149710-S | rs7559665  | 2  | 231082317 | 11492  | 10.0957 | 0.5181 | 8.09 | 6.43 | 5.02 | 5.02 | YRI |
| MALT1     | GI_27886565-A | rs7227586  | 18 | 54516958  | 51162  | 6.4047  | 0.3496 | 7.48 | 5.65 | 4.81 | 4.81 | YRI |
| MAML1     | GI_41350321-S | rs7566     | 5  | 179089055 | 47486  | 6.7185  | 0.3652 | 6.77 | 5.52 | 4.55 | 4.55 | YRI |
| MAN1A2    | GI_40254840-S | rs4460623  | 1  | 117659287 | 118291 | 9.4495  | 0.4867 | 7.67 | 6.01 | 4.79 | 4.79 | YRI |
| MAP2K2    | GI_21614527-S | rs350818   | 19 | 4037807   | 3566   | 5.9418  | 0.3259 | 8.15 | 5.83 | 4.74 | 4.74 | YRI |
| MAP3K2    | GI_21735555-S | rs1011019  | 2  | 127753790 | 26391  | 8.0145  | 0.4259 | 7.05 | 5.64 | 4.54 | 4.54 | YRI |
| MAP3K8    | GI_22035597-S | rs7475513  | 10 | 30112200  | 678153 | 6.8185  | 0.3701 | 6.86 | 5.55 | 4.67 | 4.67 | YRI |
| MAP3K9    | GI_37545956-S | rs2158531  | 14 | 70316721  | 51614  | 10.7012 | 0.5345 | 6.86 | 5.61 | 4.52 | 4.52 | YRI |
| MAP4K3    | GI_15451901-S | rs2043188  | 2  | 38840632  | 548854 | 6.3554  | 0.3471 | 8.27 | 5.89 | 4.85 | 4.85 | YRI |
| MASTL     | GI_14249561-S | rs7068375  | 10 | 27494117  | 21333  | 11.6329 | 0.5673 | 6.76 | 5.53 | 4.64 | 4.64 | YRI |
| MED8      | GI_42490745-A | rs111172   | 1  | 43519566  | 828    | 5.9237  | 0.325  | 7.69 | 5.49 | 4.48 | 4.48 | YRI |
| MGC:13379 | GI_19923799-S | rs10897159 | 11 | 60948930  | 26177  | 5.5846  | 0.3072 | 6.86 | 5.53 | 4.54 | 4.54 | YRI |
| MGC10120  | GI_28603839-S | rs12762869 | 10 | 101983702 | 40795  | 21.0317 | 0.7937 | 13   | 9.95 | 7.13 | 7.13 | YRI |
| MGC10744  | GI_34101277-A | rs9900848  | 17 | 8040096   | 22459  | 9.3216  | 0.4815 | 8.03 | 6.81 | 5.03 | 5.03 | YRI |
| MGC12458  | GI_14150107-S | rs576872   | 1  | 241549105 | 27975  | 8.3587  | 0.4411 | 6.93 | 5.91 | 4.71 | 4.71 | YRI |
| MGC15763  | GI_19923906-S | rs478483   | 3  | 16337133  | 18891  | 6.4483  | 0.3618 | 7.05 | 6.06 | 4.86 | 4.86 | YRI |
| MGC16597  | GI_42661280-S | rs7209877  | 17 | 77248042  | 2413   | 5.932   | 0.3254 | 6.58 | 5.62 | 4.54 | 4.54 | YRI |
| MGC19764  | GI_42661257-S | rs883416   | 17 | 30594554  | 24027  | 10.5625 | 0.5294 | 7.91 | 5.94 | 4.88 | 4.88 | YRI |
| MGC20235  | GI_21450795-S | rs915945   | 17 | 38433390  | 293442 | 6.2413  | 0.3413 | 7.89 | 5.55 | 4.42 | 4.42 | YRI |
| MGC20781  | GI_34147471-S | rs4796715  | 17 | 37247297  | 12146  | 8.5382  | 0.4488 | 6.61 | 5.36 | 4.45 | 4.45 | YRI |
| MGC21675  | GI_16418362-S | rs3811733  | 4  | 1249480   | 13914  | 6.1021  | 0.3342 | 6.86 | 5.86 | 4.56 | 4.56 | YRI |
| MGC2198   | GI_20270388-S | rs1065212  | 5  | 175743739 | 5325   | 7.4151  | 0.3985 | 6.38 | 5.77 | 4.64 | 4.64 | YRI |
| MGC22773  | GI_21687083-S | rs2069302  | 1  | 74377628  | 19609  | 10.131  | 0.5194 | 6.87 | 5.74 | 4.55 | 4.55 | YRI |
| MGC22960  | GI_40316917-S | rs1057535  | 1  | 46527918  | 14563  | 7.2155  | 0.3891 | 6.4  | 5.31 | 4.38 | 4.38 | YRI |
| MGC2744   | GI_34147388-S | rs8064783  | 17 | 38375814  | 18400  | 5.219   | 0.2874 | 6.51 | 5.2  | 4.41 | 4.41 | YRI |
| MGC2747   | GI_34147357-S | rs16981374 | 19 | 16630216  | 12059  | 6.2871  | 0.3535 | 6.27 | 5.42 | 4.45 | 4.45 | YRI |
| MGC3248   | GI_34147426-S | rs7588     | 16 | 23588666  | 276    | 6.8927  | 0.3737 | 6.51 | 5.77 | 4.58 | 4.58 | YRI |
| MGC3265   | GI_31543180-S | rs352346   | 5  | 148706014 | 23038  | 6.4922  | 0.354  | 6.75 | 5.52 | 4.59 | 4.59 | YRI |
| MGC33948  | GI_40255122-S | rs17107980 | 11 | 107732685 | 36509  | 10.3079 | 0.52   | 7.31 | 6.06 | 4.7  | 4.7  | YRI |
| MGC5242   | GI_13162284-S | rs2718151  | 7  | 134131445 | 176579 | 6.7675  | 0.3779 | 6.85 | 5.61 | 4.57 | 4.57 | YRI |
| MK-STYX   | GI_32481212-S | rs8565     | 7  | 75274925  | 17     | 6.9804  | 0.3779 | 6.52 | 5.4  | 4.33 | 4.33 | YRI |
| MMRP19    | GI_7705723-S  | rs1571133  | 11 | 34866502  | 26     | 11.7126 | 0.57   | 7.37 | 5.74 | 4.73 | 4.73 | YRI |
| MPST      | GI_23510449-S | rs5756489  | 22 | 35741697  | 8369   | 7.1411  | 0.3909 | 7.83 | 5.84 | 4.81 | 4.81 | YRI |
| MR1       | GI_4504416-S  | rs10797666 | 1  | 177750456 | 3963   | 7.2227  | 0.3895 | 6.2  | 5.53 | 4.6  | 4.6  | YRI |
| MRPL21    | GI_31652223-A | rs685320   | 11 | 68448717  | 33303  | 6.0125  | 0.3296 | 6.29 | 5.53 | 4.59 | 4.59 | YRI |
| MRPL35    | GI_22035593-A | rs11127018 | 2  | 86366572  | 15127  | 7.0549  | 0.3815 | 8.26 | 5.68 | 4.51 | 4.51 | YRI |
| MRPL43    | GI_28872735-A | rs2863095  | 10 | 102736493 | 116    | 22.8283 | 0.8211 | 7.42 | 5.61 | 4.47 | 4.47 | YRI |
| MRPL53    | GI_22035595-S | rs1047911  | 2  | 74611433  | 39     | 7.3453  | 0.3953 | 7.03 | 5.97 | 4.61 | 4.61 | YRI |
| MRPL54    | GI_27436907-S | rs13960    | 19 | 3713698   | 2608   | 7.5503  | 0.4048 | 6.47 | 5.6  | 4.56 | 4.56 | YRI |
| MRPS12    | GI_11056055-I | rs2070250  | 19 | 44113768  | 55     | 11.6486 | 0.5678 | 7.05 | 5.58 | 4.64 | 4.64 | YRI |
| MRPS9     | GI_33188462-S | rs11897155 | 2  | 105142765 | 31930  | 6.2164  | 0.3401 | 6.66 | 5.98 | 4.83 | 4.83 | YRI |
| MTRR      | GI_4505278-A  | rs162036   | 5  | 7938959   | 15031  | 9.5389  | 0.4902 | 8.05 | 5.35 | 4.49 | 4.49 | YRI |
| NARF      | GI_14165459-A | rs4789773  | 17 | 77984973  | 54139  | 6.0059  | 0.3292 | 6.85 | 5.64 | 4.47 | 4.47 | YRI |
| NDP52     | GI_33519473-S | rs8078984  | 17 | 44267550  | 29473  | 10.366  | 0.5222 | 6.33 | 5.42 | 4.5  | 4.5  | YRI |
| NDUFS5    | GI_4758789-S  | rs10888650 | 1  | 39176254  | 15118  | 6.1625  | 0.3373 | 6.88 | 5.81 | 4.8  | 4.8  | YRI |
| NOL6      | GI_39777589-A | rs476059   | 9  | 33448577  | 2846   | 6.481   | 0.3534 | 6.85 | 6.07 | 4.69 | 4.69 | YRI |
| NR4A3     | GI_27894358-A | rs7863319  | 9  | 99340111  | 335030 | 6.3003  | 0.3443 | 7.86 | 5.88 | 4.71 | 4.71 | YRI |

|           |               |            |    |           |        |         |        |      |      |      |      |     |
|-----------|---------------|------------|----|-----------|--------|---------|--------|------|------|------|------|-----|
| NUCB2     | GI_4826869-S  | rs10741725 | 11 | 17277373  | 31032  | 5.8737  | 0.3224 | 7.3  | 5.58 | 4.47 | 4.47 | YRI |
| NUDT13    | GI_34330151-S | rs7894359  | 10 | 74534394  | 26534  | 7.6568  | 0.4097 | 7.3  | 5.42 | 4.34 | 4.34 | YRI |
| NUDT2     | GI_22219466-A | rs7867248  | 9  | 34310264  | 23239  | 15.2667 | 0.6749 | 6.75 | 5.75 | 4.48 | 4.48 | YRI |
| NUDT8     | GI_32469514-S | rs7938563  | 11 | 67060707  | 91487  | 5.4279  | 0.2988 | 6.15 | 5.35 | 4.42 | 4.42 | YRI |
| NUDT9     | GI_37594456-A | rs6811514  | 4  | 89205195  | 468831 | 6.7686  | 0.3676 | 6.57 | 5.56 | 4.61 | 4.61 | YRI |
| NUP50     | GI_24497446-A | rs132863   | 22 | 43884964  | 15941  | 7.8174  | 0.417  | 6.49 | 5.79 | 4.81 | 4.81 | YRI |
| ORMDL3    | GI_27544926-S | rs8067378  | 17 | 35304874  | 26224  | 7.7676  | 0.4203 | 6.37 | 5.35 | 4.31 | 4.31 | YRI |
| P66beta   | GI_21218437-S | rs6695083  | 1  | 150723573 | 130907 | 8.644   | 0.4534 | 6.53 | 5.52 | 4.43 | 4.43 | YRI |
| PHEMX     | GI_37595532-A | rs2074021  | 11 | 2280104   | 15769  | 12.4207 | 0.5997 | 6.44 | 5.54 | 4.6  | 4.6  | YRI |
| PHYH      | GI_17999532-S | rs661457   | 10 | 13350742  | 12339  | 7.2217  | 0.3894 | 7.44 | 6.18 | 5.02 | 5.02 | YRI |
| PIAS3     | GI_31543399-S | rs2799118  | 1  | 143205766 | 130338 | 6.4556  | 0.3521 | 6.73 | 5.2  | 4.16 | 4.16 | YRI |
| PIGF      | GI_27894289-A | rs10167561 | 2  | 46879702  | 148397 | 6.9912  | 0.3784 | 6.84 | 5.68 | 4.65 | 4.65 | YRI |
| PKHD1L1   | GI_31377831-S | rs2844257  | 8  | 110590653 | 17602  | 17.0162 | 0.7168 | 6.08 | 5.23 | 4.52 | 4.52 | YRI |
| PNRC1     | GI_5802981-S  | rs2274819  | 6  | 89871775  | 20393  | 9.8836  | 0.5038 | 7.43 | 5.97 | 4.67 | 4.67 | YRI |
| POLR1A    | GI_7661685-S  | rs12124    | 2  | 86165166  | 1573   | 11.6359 | 0.5674 | 6.35 | 5.73 | 4.56 | 4.56 | YRI |
| POLR2E    | GI_14589950-S | rs6843     | 19 | 1039285   | 9      | 14.575  | 0.6567 | 6.78 | 5.73 | 4.76 | 4.76 | YRI |
| POLR3F    | GI_33598951-S | rs6075351  | 20 | 18438913  | 25841  | 7.76    | 0.4144 | 7.62 | 5.61 | 4.51 | 4.51 | YRI |
| PP3856    | GI_40255088-S | rs2242089  | 8  | 144760289 | 32156  | 10.4984 | 0.5271 | 10.2 | 7.46 | 5.44 | 5.44 | YRI |
| PPA2      | GI_31881619-A | rs2726526  | 4  | 106649725 | 1306   | 7.9782  | 0.4299 | 6.87 | 5.47 | 4.56 | 4.56 | YRI |
| PPIL3     | GI_19557635-A | rs11892372 | 2  | 201644989 | 83678  | 21.9454 | 0.8081 | 6.93 | 5.7  | 4.5  | 4.5  | YRI |
| PPP1R12A  | GI_4505316-S  | rs2430863  | 12 | 78663339  | 7611   | 5.8864  | 0.323  | 6.4  | 5.66 | 4.52 | 4.52 | YRI |
| PRKCL1    | GI_42476156-S | rs2241357  | 19 | 14451919  | 9297   | 7.2313  | 0.3899 | 6.05 | 5.48 | 4.48 | 4.48 | YRI |
| PRRG2     | GI_4506136-S  | rs11878999 | 19 | 54809873  | 23894  | 7.2221  | 0.3894 | 7.38 | 5.71 | 4.54 | 4.54 | YRI |
| PSMF1     | GI_30581144-A | rs1217     | 20 | 1110615   | 14780  | 8.0693  | 0.4283 | 7.73 | 6.05 | 5    | 5    | YRI |
| PTCH      | GI_25121959-S | rs10761333 | 9  | 94392139  | 894106 | 6.009   | 0.3294 | 7.55 | 5.87 | 4.5  | 4.5  | YRI |
| PTER      | GI_20070185-S | rs1055340  | 10 | 16595534  | 974    | 20.0607 | 0.7773 | 7.85 | 5.74 | 4.64 | 4.64 | YRI |
| PTGS1     | GI_18104968-A | rs2282169  | 9  | 122220250 | 17191  | 8.512   | 0.4477 | 8.53 | 5.95 | 4.76 | 4.76 | YRI |
| QRSL1     | GI_19923522-S | rs1026619  | 6  | 107221054 | 740    | 6.3731  | 0.3529 | 7    | 5.76 | 4.6  | 4.6  | YRI |
| RAB18     | GI_34222129-S | rs12261672 | 10 | 27803085  | 64300  | 7.9791  | 0.4243 | 7.44 | 5.58 | 4.72 | 4.72 | YRI |
| RAB31     | GI_33589860-S | rs1893126  | 18 | 9702098   | 150233 | 8.5404  | 0.4489 | 6.88 | 5.93 | 4.75 | 4.75 | YRI |
| RAB40B    | GI_5803162-S  | rs4796860  | 17 | 77536764  | 672142 | 6.6048  | 0.3595 | 7.84 | 6.37 | 4.95 | 4.95 | YRI |
| RABIF     | GI_31543539-S | rs7523420  | 1  | 199597361 | 17100  | 9.5065  | 0.4889 | 7.08 | 5.88 | 4.73 | 4.73 | YRI |
| RAD51     | GI_19924134-A | rs2304582  | 15 | 38818157  | 6860   | 8.7562  | 0.4639 | 6.75 | 5.69 | 4.62 | 4.62 | YRI |
| RAMP1     | GI_5032018-S  | rs6741923  | 2  | 238581206 | 21449  | 6.1397  | 0.3361 | 7.03 | 6.06 | 4.81 | 4.81 | YRI |
| RAPGEFL1  | GI_7705938-S  | rs8065665  | 17 | 35735789  | 130454 | 8.0636  | 0.4281 | 7.26 | 5.37 | 4.39 | 4.39 | YRI |
| raptor    | GI_22094986-S | rs1062935  | 17 | 76554452  | 37     | 6.5294  | 0.3558 | 7.27 | 5.36 | 4.51 | 4.51 | YRI |
| RLN1      | GI_20143931-S | rs2273782  | 9  | 5325470   | 167    | 5.6898  | 0.3127 | 6.66 | 5.62 | 4.74 | 4.74 | YRI |
| RPL13     | GI_15431296-A | rs462464   | 16 | 88140538  | 16489  | 5.9037  | 0.3239 | 7.5  | 5.64 | 4.55 | 4.55 | YRI |
| RPL28     | GI_34486095-S | rs10408088 | 19 | 60596405  | 1348   | 10.5671 | 0.5296 | 6.44 | 5.66 | 4.68 | 4.68 | YRI |
| RPL36AL   | GI_34335143-S | rs2985696  | 14 | 49164663  | 7588   | 11.44   | 0.5607 | 6.51 | 5.18 | 4.48 | 4.48 | YRI |
| RPL37A    | GI_16306561-S | rs3732019  | 2  | 217187892 | 1196   | 10.2312 | 0.5171 | 7.15 | 6.31 | 5.06 | 5.06 | YRI |
| RPS15A    | GI_34335150-S | rs735173   | 16 | 18747289  | 38195  | 7.3704  | 0.3964 | 6.1  | 5.23 | 4.39 | 4.39 | YRI |
| RPS6KB2   | GI_4506738-S  | rs2302264  | 11 | 66964002  | 4657   | 10.8339 | 0.5393 | 5.8  | 5.1  | 4.35 | 4.35 | YRI |
| RWDD3     | GI_21361481-S | rs915502   | 1  | 95308132  | 113917 | 8.2011  | 0.4398 | 7.3  | 5.93 | 4.87 | 4.87 | YRI |
| SACM1L    | GI_41281578-S | rs2373047  | 3  | 45722501  | 39276  | 6.0129  | 0.3296 | 7.12 | 5.71 | 4.64 | 4.64 | YRI |
| SBP1      | GI_30017464-S | rs13346092 | 19 | 47579296  | 4623   | 8.1751  | 0.433  | 6.7  | 5.53 | 4.4  | 4.4  | YRI |
| SCAMP5    | GI_42544128-S | rs11633539 | 15 | 72853349  | 247217 | 11.7299 | 0.5706 | 8.2  | 5.9  | 4.7  | 4.7  | YRI |
| SEC10L1   | GI_38202212-S | rs4608256  | 14 | 56787043  | 46496  | 12.1029 | 0.583  | 9.16 | 7.18 | 5.42 | 5.42 | YRI |
| SELS      | GI_45439348-I | rs9874     | 15 | 99628927  | 129    | 7.644   | 0.4091 | 6.62 | 5.75 | 4.57 | 4.57 | YRI |
| SERPINB10 | GI_4826901-S  | rs12327162 | 18 | 59731189  | 22003  | 7.5991  | 0.407  | 6.46 | 5.67 | 4.83 | 4.83 | YRI |
| SESTD1    | GI_31342410-S | rs2289993  | 2  | 179805436 | 5365   | 6.62    | 0.3603 | 6.28 | 5.24 | 4.44 | 4.44 | YRI |
| SF1       | GI_42544126-I | rs550930   | 11 | 64263891  | 36408  | 8.2441  | 0.4361 | 7.08 | 5.45 | 4.41 | 4.41 | YRI |
| SFRS10    | GI_4759097-S  | rs2251407  | 3  | 187137626 | 20262  | 7.1982  | 0.3883 | 7.28 | 6.16 | 4.88 | 4.88 | YRI |
| SFXN2     | GI_34222270-S | rs11191393 | 10 | 104517420 | 28629  | 7.7717  | 0.4149 | 6.99 | 5.45 | 4.29 | 4.29 | YRI |
| SIAT8E    | GI_28373100-S | rs3809958  | 18 | 42591684  | 78394  | 10.1978 | 0.5158 | 7.32 | 6.25 | 4.83 | 4.83 | YRI |
| SLB       | GI_37546863-S | rs813592   | 2  | 27633622  | 54659  | 6.1761  | 0.338  | 6.4  | 5.67 | 4.58 | 4.58 | YRI |

|          |               |            |    |           |        |         |        |      |      |      |      |     |
|----------|---------------|------------|----|-----------|--------|---------|--------|------|------|------|------|-----|
| SLC11A2  | GI_10835168-S | rs150909   | 12 | 49667344  | 1208   | 6.6443  | 0.3615 | 6.68 | 5.4  | 4.43 | 4.43 | YRI |
| SLC25A16 | GI_31652216-S | rs10998210 | 10 | 69907166  | 5412   | 12.7309 | 0.6031 | 6.36 | 5.54 | 4.52 | 4.52 | YRI |
| SLC35A5  | GI_31543636-S | rs2705517  | 3  | 113802373 | 16909  | 6.266   | 0.3426 | 8.07 | 5.44 | 4.43 | 4.43 | YRI |
| SLC35B3  | GI_21361502-S | rs10484748 | 6  | 8376192   | 17575  | 6.453   | 0.362  | 7.11 | 5.56 | 4.59 | 4.59 | YRI |
| SNX11    | GI_23111027-I | rs6504025  | 17 | 43521072  | 22024  | 7.6625  | 0.41   | 7.67 | 5.52 | 4.51 | 4.51 | YRI |
| SNX17    | GI_23238249-S | rs780092   | 2  | 27654805  | 143504 | 5.9496  | 0.3263 | 6.51 | 5.62 | 4.47 | 4.47 | YRI |
| SORD     | GI_34147623-S | rs269868   | 15 | 43179367  | 25086  | 6.5595  | 0.3573 | 8.79 | 5.56 | 4.46 | 4.46 | YRI |
| SOS1     | GI_15529995-S | rs1037495  | 2  | 39121077  | 3673   | 12.4949 | 0.5956 | 6.71 | 5.71 | 4.61 | 4.61 | YRI |
| SPA17    | GI_15718773-S | rs7927406  | 11 | 124049013 | 20461  | 8.5893  | 0.451  | 6.68 | 5.42 | 4.49 | 4.49 | YRI |
| SPG7     | GI_40806172-I | rs382745   | 16 | 88131087  | 282    | 6.6608  | 0.3623 | 7.47 | 5.56 | 4.42 | 4.42 | YRI |
| SPTLC1   | GI_30474870-I | rs7871997  | 9  | 91861919  | 59451  | 21.0815 | 0.7946 | 7.52 | 5.65 | 4.46 | 4.46 | YRI |
| SQSTM1   | GI_19923742-S | rs10277    | 5  | 179197337 | 249    | 7.0706  | 0.3822 | 6.63 | 5.41 | 4.62 | 4.62 | YRI |
| SSR2     | GI_6552341-S  | rs1750305  | 1  | 153267457 | 475328 | 5.6519  | 0.3107 | 6.38 | 5.32 | 4.5  | 4.5  | YRI |
| ST7L     | GI_38201636-A | rs7415820  | 1  | 112881491 | 84792  | 14.2519 | 0.6478 | 7.09 | 5.78 | 4.67 | 4.67 | YRI |
| STK25    | GI_34147665-S | rs2240482  | 2  | 242125011 | 29600  | 14.8714 | 0.6646 | 6.95 | 6.03 | 4.82 | 4.82 | YRI |
| SURF6    | GI_39812452-S | rs12335    | 9  | 133227388 | 225    | 10.8934 | 0.5415 | 8.22 | 5.85 | 4.72 | 4.72 | YRI |
| SVH      | GI_31377662-S | rs6950177  | 7  | 102334634 | 1255   | 7.0346  | 0.3805 | 6.29 | 5.69 | 4.5  | 4.5  | YRI |
| SYNGR1   | GI_22035699-A | rs909685   | 22 | 38072171  | 24459  | 16.0636 | 0.6947 | 7.94 | 5.7  | 4.63 | 4.63 | YRI |
| TAP2     | GI_9961245-I  | rs2071543  | 6  | 32919607  | 16414  | 8.6901  | 0.4553 | 11.5 | 6.99 | 5.13 | 5.13 | YRI |
| TAPBP    | GI_27436892-I | rs1801823  | 6  | 33367560  | 7932   | 8.2583  | 0.4367 | 6.82 | 5.58 | 4.6  | 4.6  | YRI |
| THAP1    | GI_40068498-S | rs7461288  | 8  | 42805356  | 6086   | 5.5144  | 0.3034 | 7.09 | 5.24 | 4.3  | 4.3  | YRI |
| THAP5    | GI_32698887-S | rs40947    | 7  | 107800604 | 1910   | 11.9573 | 0.5846 | 7.54 | 6.19 | 4.9  | 4.9  | YRI |
| THAP6    | GI_37059751-S | rs7673610  | 4  | 76817715  | 6636   | 5.7365  | 0.3152 | 6.41 | 5.65 | 4.5  | 4.5  | YRI |
| TINP1    | GI_21359901-S | rs6877188  | 5  | 74067281  | 38238  | 19.3492 | 0.7644 | 7.78 | 5.92 | 4.67 | 4.67 | YRI |
| TJP2     | GI_42518069-S | rs2486452  | 9  | 69050460  | 48585  | 6.1154  | 0.3397 | 7.8  | 5.87 | 4.68 | 4.68 | YRI |
| TOMM34   | GI_40807467-S | rs10485453 | 20 | 43002140  | 2254   | 8.364   | 0.4413 | 6.64 | 5.56 | 4.47 | 4.47 | YRI |
| TOP1MT   | GI_16418460-S | rs901773   | 8  | 144489976 | 20399  | 7.8242  | 0.4173 | 6.35 | 5.61 | 4.54 | 4.54 | YRI |
| TOP2B    | GI_19913407-S | rs6799331  | 3  | 25678644  | 63749  | 6.7476  | 0.3666 | 6.08 | 5.44 | 4.62 | 4.62 | YRI |
| TP53AP1  | GI_6005909-S  | rs10499902 | 7  | 86609620  | 10225  | 6.7693  | 0.3676 | 6.46 | 5.41 | 4.39 | 4.39 | YRI |
| TRIM4    | GI_15011940-A | rs1048705  | 7  | 99133591  | 218    | 7.6594  | 0.4098 | 7.06 | 5.77 | 4.52 | 4.52 | YRI |
| TRIT1    | GI_32306540-S | rs11811998 | 1  | 40027819  | 51512  | 8.7858  | 0.4652 | 7.92 | 5.5  | 4.39 | 4.39 | YRI |
| TRNT1    | GI_41281989-I | rs1705805  | 3  | 3164279   | 1184   | 6.6835  | 0.3634 | 7.85 | 6.18 | 4.98 | 4.98 | YRI |
| TSG101   | GI_18765712-S | rs3925781  | 11 | 18481066  | 21289  | 10.3534 | 0.5217 | 6.21 | 5.32 | 4.53 | 4.53 | YRI |
| TSGA10   | GI_41281983-I | rs10181422 | 2  | 99017488  | 198939 | 8.113   | 0.4303 | 7.02 | 5.74 | 4.49 | 4.49 | YRI |
| UBE2L3   | GI_38157977-A | rs878825   | 22 | 20306803  | 4036   | 7.795   | 0.416  | 6.88 | 5.95 | 4.72 | 4.72 | YRI |
| UGT2B11  | GI_4507822-S  | rs3100645  | 4  | 69671954  | 575169 | 6.8276  | 0.3756 | 7.55 | 6.26 | 4.82 | 4.82 | YRI |
| UGT2B7   | GI_4507824-S  | rs3100645  | 4  | 69671954  | 487102 | 6.5765  | 0.3632 | 8.53 | 6.31 | 4.85 | 4.85 | YRI |
| USP36    | GI_35250685-S | rs6501248  | 17 | 74267767  | 27506  | 8.3585  | 0.4411 | 6.26 | 5.67 | 4.68 | 4.68 | YRI |
| USP52    | GI_41281526-S | rs10747749 | 12 | 54065470  | 931663 | 6.4451  | 0.3516 | 6.49 | 5.45 | 4.5  | 4.5  | YRI |
| VPS11    | GI_17978476-S | rs4614     | 11 | 118457581 | 24     | 7.0093  | 0.3793 | 6.57 | 5.69 | 4.61 | 4.61 | YRI |
| VRK3     | GI_31982928-S | rs11881272 | 19 | 55360157  | 188512 | 6.2868  | 0.3436 | 7.01 | 5.41 | 4.59 | 4.59 | YRI |
| WBSCR27  | GI_30795189-S | rs13232463 | 7  | 72693950  | 148    | 8.8484  | 0.462  | 6.29 | 5.26 | 4.19 | 4.19 | YRI |
| WDR20    | GI_31317273-I | rs7141129  | 14 | 101835084 | 75543  | 5.9266  | 0.3251 | 6.95 | 5.59 | 4.57 | 4.57 | YRI |
| WINS1    | GI_32454732-I | rs8451     | 15 | 98927200  | 2936   | 6.1762  | 0.338  | 6.66 | 5.64 | 4.7  | 4.7  | YRI |
| XRR1     | GI_42659736-S | rs4944950  | 11 | 74159279  | 70714  | 9.8259  | 0.5015 | 8.08 | 5.74 | 4.67 | 4.67 | YRI |
| ZCCHC9   | GI_14150026-S | rs10035917 | 5  | 81058250  | 413952 | 5.667   | 0.3115 | 6.17 | 5.49 | 4.47 | 4.47 | YRI |
| ZFP100   | GI_27485310-S | rs10409482 | 19 | 55189890  | 53734  | 14.893  | 0.6847 | 7.88 | 5.9  | 4.7  | 4.7  | YRI |
| ZFP161   | GI_19923241-S | rs2789     | 18 | 5279887   | 241    | 5.924   | 0.3498 | 6.38 | 5.72 | 4.76 | 4.76 | YRI |
| ZFYVE21  | GI_20070329-S | rs4983582  | 14 | 104062516 | 793012 | 5.7789  | 0.3174 | 6.23 | 5.5  | 4.51 | 4.51 | YRI |
| ZNF160   | GI_38788301-I | rs329719   | 19 | 58280861  | 5653   | 6.5546  | 0.3571 | 7.1  | 5.84 | 4.77 | 4.77 | YRI |
| ZNF211   | GI_38569444-S | rs9749218  | 19 | 62834703  | 11033  | 6.9201  | 0.375  | 6.13 | 5.43 | 4.55 | 4.55 | YRI |
| ZNF213   | GI_32698677-S | rs2238378  | 16 | 3133218   | 715    | 9.1925  | 0.4762 | 6.66 | 5.63 | 4.59 | 4.59 | YRI |
| ZNF230   | GI_5454181-S  | rs1060880  | 19 | 49207192  | 13     | 12.4103 | 0.5929 | 6.12 | 5.62 | 4.51 | 4.51 | YRI |
| ZNF237   | GI_7657706-S  | rs7320086  | 13 | 19231071  | 79964  | 7.995   | 0.425  | 6.36 | 5.64 | 4.44 | 4.44 | YRI |
| ZNF253   | GI_10567821-S | rs7254125  | 19 | 19897615  | 33001  | 6.1635  | 0.3374 | 8.07 | 5.81 | 4.47 | 4.47 | YRI |
| ZNF266   | GI_37622342-A | rs1347166  | 19 | 9348808   | 35532  | 9.7934  | 0.5003 | 7.02 | 5.66 | 4.57 | 4.57 | YRI |



|         |               |            |    |           |       |         |        |      |      |      |      |     |
|---------|---------------|------------|----|-----------|-------|---------|--------|------|------|------|------|-----|
| ZNF30   | GI_34996520-S | rs1053213  | 19 | 40127616  | 21    | 9.4699  | 0.4875 | 6.79 | 5.98 | 4.54 | 4.54 | YRI |
| ZNF34   | GI_31543141-S | rs7829752  | 8  | 145996305 | 26858 | 5.5976  | 0.3078 | 6.11 | 5.33 | 4.33 | 4.33 | YRI |
| ZNF363  | GI_24308060-S | rs2126854  | 4  | 76810328  | 45413 | 5.4243  | 0.2986 | 7.56 | 5.38 | 4.41 | 4.41 | YRI |
| ZNF493  | GI_40255231-S | rs6511239  | 19 | 21380966  | 19788 | 7.2256  | 0.3949 | 7.32 | 5.36 | 4.16 | 4.16 | YRI |
| ZNF557  | GI_13236592-S | rs2115475  | 19 | 7039333   | 5026  | 6.568   | 0.3627 | 7.52 | 6.05 | 4.61 | 4.61 | YRI |
| ZNF85   | GI_4508038-S  | rs10454111 | 19 | 20904788  | 20413 | 12.0409 | 0.581  | 6.7  | 5.48 | 4.5  | 4.5  | YRI |
| ZNFN1A1 | GI_31657112-S | rs7792486  | 7  | 50260518  | 16155 | 6.181   | 0.3431 | 8.21 | 5.56 | 4.63 | 4.63 | YRI |
| ZNRD1   | GI_25777705-A | rs11755984 | 6  | 30061014  | 76988 | 7.2064  | 0.3887 | 7.31 | 5.79 | 4.52 | 4.52 | YRI |

Table S3: Most significant associations of CGH-clones with gene expression at 0.001

| Gene_Label    | Illumina Gene_ID | clone_Label   | clone_start B35 | clone_end B35 | Chromosome | Distance probe to CNV_start | Distance probe to CNV_end | -log10(p-value) | Adjusted_R^2 | permutation threshold 10-4 | permutation threshold 10-3 | permutation threshold 10-2 | permutation threshold 0.05 | population |
|---------------|------------------|---------------|-----------------|---------------|------------|-----------------------------|---------------------------|-----------------|--------------|----------------------------|----------------------------|----------------------------|----------------------------|------------|
| B3GTL         | GL_34996530-S    | Chr13tp-4C1   | 32572851        | 32739179      | 13         | 1769296                     | 1935624                   | 4.5095          | 0.2555       | 5.0934                     | 4.494                      | 3.6349                     | 2.823                      | CEU        |
| B4GALT1       | GL_13929461-S    | Chr9tp-2B9    | 32990076        | 33141107      | 9          | -110842                     | 40189                     | 6.1114          | 0.3494       | 5.3819                     | 4.54                       | 3.5263                     | 2.759                      | CEU        |
| BBX           | GL_18378730-S    | Chr3tp-15B10  | 110121124       | 110248865     | 3          | 1114068                     | 1241809                   | 5.1429          | 0.2833       | 6.1958                     | 4.738                      | 3.6527                     | 2.942                      | CEU        |
| C13orf12      | GL_21361533-S    | Chr13tp-4D6   | 28033029        | 28199094      | 13         | -117167                     | 48898                     | 5.2186          | 0.2874       | 5.4241                     | 4.537                      | 3.5703                     | 2.809                      | CEU        |
| CHL1          | GL_27894375-S    | Chr3tp-4B4    | 333626          | 518322        | 3          | -90713                      | 93983                     | 6.1255          | 0.3451       | 4.6709                     | 4.338                      | 3.2133                     | 2.566                      | CEU        |
| CPNE8         | GL_38683845-S    | Chr12tp-20G1  | 38760988        | 38939322      | 12         | 1428015                     | 1606349                   | 6.083           | 0.3332       | 5.8267                     | 4.477                      | 3.4242                     | 2.725                      | CEU        |
| CREB5         | GL_4758499-A     | Chr7tp-19C7   | 28147859        | 28305298      | 7          | -484872                     | -327433                   | 10.838          | 0.5654       | 5.7886                     | 4.59                       | 3.6306                     | 2.834                      | CEU        |
| CTNNA2        | GL_7656998-S     | Chr2tp-3G4    | 80574566        | 80754119      | 2          | -212771                     | -33218                    | 7.1119          | 0.3949       | 5.1611                     | 4.53                       | 3.5535                     | 2.837                      | CEU        |
| CTNS          | GL_4826681-S     | Chr17tp-2G2   | 3350005         | 3512944       | 17         | -161419                     | 1520                      | 4.5975          | 0.2567       | 4.796                      | 4.448                      | 3.5621                     | 2.779                      | CEU        |
| CYP7B1        | GL_13787190-S    | Chr8tp-4C6    | 65866085        | 66009709      | 8          | 194143                      | 337767                    | 5.5115          | 0.3033       | 5.4029                     | 4.754                      | 3.4807                     | 2.818                      | CEU        |
| DKFZp434O0213 | GL_32698823-S    | Chr22tp-8G4   | 23976814        | 24145392      | 22         | -95275                      | 73303                     | 6.9669          | 0.3772       | 6.0092                     | 4.535                      | 3.4894                     | 2.728                      | CEU        |
| EPS8          | GL_34222299-S    | Chr12tp-19C8  | 16129779        | 16284706      | 12         | 465004                      | 619931                    | 4.7655          | 0.2623       | 5.1345                     | 4.56                       | 3.6387                     | 2.924                      | CEU        |
| EXT1          | GL_4557570-S     | Chr8tp-9D4    | 119317502       | 119493081     | 8          | 436446                      | 612025                    | 4.4679          | 0.2454       | 5.2771                     | 4.438                      | 3.5152                     | 2.826                      | CEU        |
| FLJ13614      | GL_20589960-S    | Chr4tp-9F11   | 83621297        | 83819983      | 4          | -1118764                    | -920078                   | 4.7637          | 0.2622       | 5.6739                     | 4.612                      | 3.5457                     | 2.863                      | CEU        |
| FLJ23403      | GL_13384601-S    | Chr18tp-1G12  | 11162286        | 11327785      | 18         | 501298                      | 666797                    | 6.1652          | 0.3374       | 5.9305                     | 4.475                      | 3.5489                     | 2.79                       | CEU        |
| FLJ43692      | GL_38348301-S    | Chr7tp-5B10   | 143412957       | 143479566     | 7          | 92344                       | 158953                    | 5.7529          | 0.3206       | 5.9335                     | 4.679                      | 3.5176                     | 2.78                       | CEU        |
| GAP43         | GL_28872807-S    | Chr3tp-22E12  | 115673746       | 115809745     | 3          | -1248997                    | -1112998                  | 5.4795          | 0.306        | 6.5077                     | 5.239                      | 3.9314                     | 3.09                       | CEU        |
| GBP3          | GL_24308156-S    | Chr1tp-29F3   | 89124089        | 89189073      | 1          | -61102                      | 3882                      | 5.9266          | 0.3298       | 6.6323                     | 4.666                      | 3.5825                     | 2.849                      | CEU        |
| GNAI3         | GL_5729849-S     | Chr1tp-19B2   | 108167908       | 108334093     | 1          | -1680262                    | -1514077                  | 5.8833          | 0.3275       | 5.1829                     | 4.56                       | 3.5102                     | 2.829                      | CEU        |
| GNF           | GL_38788307-S    | Chr9tp-10A8   | 37215146        | 37385618      | 9          | 1010384                     | 1180856                   | 5.2378          | 0.2971       | 6.1792                     | 4.591                      | 3.4585                     | 2.738                      | CEU        |
| HLA-DQA1      | GL_18426974-S    | Chr6tp-5C11   | 32503398        | 32593944      | 6          | -215437                     | -124891                   | 8.5936          | 0.457        | 5.6812                     | 4.642                      | 3.6019                     | 2.834                      | CEU        |
| HLA-DQA2      | GL_11095446-S    | Chr6tp-5C11   | 32503398        | 32593944      | 6          | -317635                     | -227089                   | 8.0767          | 0.4343       | 5.8121                     | 4.876                      | 3.5655                     | 2.884                      | CEU        |
| hmm21257      | hmm21257-S       | Chr12tp-20G1  | 38760988        | 38939322      | 12         | -143618                     | 34716                     | 7.2319          | 0.3899       | 5.6729                     | 4.561                      | 3.551                      | 2.846                      | CEU        |
| hmm23540      | hmm23540-S       | Chr17tp-12F12 | 10352771        | 10550785      | 17         | -2061574                    | -1863560                  | 4.565           | 0.2548       | 5.3132                     | 4.5                        | 3.5333                     | 2.786                      | CEU        |
| hmm30810      | hmm30810-S       | Chr5tp-11F2   | 55081994        | 55272500      | 5          | 327516                      | 518022                    | 4.7812          | 0.2632       | 5.432                      | 4.659                      | 3.5661                     | 2.9                        | CEU        |
| hmm34479      | hmm34479-S       | Chr8tp-3H5    | 2200752         | 2312389       | 8          | -456194                     | -344557                   | 4.6969          | 0.2584       | 5.4331                     | 4.591                      | 3.5922                     | 2.821                      | CEU        |
| hmm34958      | hmm34958-S       | Chr8tp-4F7    | 89032945        | 89202820      | 8          | -1806247                    | -1636372                  | 4.4988          | 0.263        | 5.3408                     | 4.432                      | 3.5887                     | 2.858                      | CEU        |
| Hs.150050     | Hs.150050-S      | Chr22tp-8G4   | 23976814        | 24145392      | 22         | -264495                     | -95917                    | 4.9706          | 0.2738       | 6.1695                     | 4.669                      | 3.5088                     | 2.732                      | CEU        |
| Hs.243596     | Hs.243596-S      | Chr13tp-4D6   | 28033029        | 28199094      | 13         | -1641996                    | -1475931                  | 5.3649          | 0.2954       | 5.4522                     | 4.529                      | 3.5117                     | 2.772                      | CEU        |
| Hs.269958     | Hs.269958-S      | Chr7tp-4H1    | 40054910        | 40234347      | 7          | 1512324                     | 1691761                   | 5.9997          | 0.3435       | 5.9025                     | 4.82                       | 3.5693                     | 2.828                      | CEU        |
| Hs.463184     | Hs.463184-S      | Chr17tp-12C1  | 40977732        | 41171794      | 17         | -18185                      | 175877                    | 6.0349          | 0.3355       | 6.3022                     | 4.637                      | 3.4836                     | 2.796                      | CEU        |
| Hs.464547     | Hs.464547-S      | Chr1tp-25E8   | 11182270        | 11282168      | 1          | -1063429                    | -963531                   | 5.7153          | 0.3186       | 5.5366                     | 4.359                      | 3.6052                     | 2.848                      | CEU        |
| Hs.476851     | Hs.476851-S      | Chr3tp-26G11  | 76747210        | 76935064      | 3          | 60551                       | 248405                    | 5.9081          | 0.3242       | 5.7532                     | 5.272                      | 4.1617                     | 3.266                      | CEU        |
| Hs.478669     | Hs.478669-S      | Chr3tp-25A11  | 191281358       | 191439015     | 3          | 10725                       | 168382                    | 5.7154          | 0.3141       | 5.64                       | 4.652                      | 3.7181                     | 2.925                      | CEU        |
| Hs.495422     | Hs.495422-S      | Chr9tp-11C4   | 131717143       | 131863140     | 9          | -1506331                    | -1360334                  | 4.3928          | 0.2448       | 5.6016                     | 4.266                      | 3.3934                     | 2.646                      | CEU        |
| Hs.498648     | Hs.498648-S      | Chr10tp-7E12  | 12085124        | 12274940      | 10         | 737444                      | 927260                    | 5.1675          | 0.2846       | 8.4037                     | 4.345                      | 3.453                      | 2.778                      | CEU        |
| Hs.507644     | Hs.507644-S      | Chr13tp-7A11  | 30326059        | 30502988      | 13         | 407908                      | 584837                    | 5.0464          | 0.278        | 5.7354                     | 4.918                      | 3.5359                     | 2.817                      | CEU        |
| Hs.525661     | Hs.525661-S      | Chr15tp-7C8   | 19932331        | 20097557      | 15         | 801991                      | 967217                    | 4.7152          | 0.2634       | 4.3978                     | 3.923                      | 3.103                      | 2.347                      | CEU        |
| IL1R1         | GL_27894331-S    | Chr2tp-24A2   | 102122465       | 102306835     | 2          | -131935                     | 52435                     | 6.4423          | 0.3667       | 5.8498                     | 4.736                      | 3.486                      | 2.769                      | CEU        |
| IL6ST         | GL_28610146-I    | Chr5tp-16D7   | 55205360        | 55361836      | 5          | -83462                      | 73014                     | 4.5954          | 0.2605       | 4.8874                     | 4.461                      | 3.5968                     | 2.858                      | CEU        |
| IL7           | GL_28610152-S    | Chr8tp-7E5    | 80578436        | 80736765      | 8          | 767139                      | 925468                    | 5.5842          | 0.3071       | 5.4261                     | 4.511                      | 3.4615                     | 2.752                      | CEU        |
| IPO7          | GL_5453997-S     | Chr11tp-2A3   | 10375098        | 10531604      | 11         | 951480                      | 1107986                   | 4.6081          | 0.2573       | 5.3987                     | 4.44                       | 3.4583                     | 2.764                      | CEU        |
| ITIH4         | GL_40288189-S    | Chr3tp-19E2   | 53282205        | 53439842      | 3          | 459729                      | 617366                    | 4.9027          | 0.27         | 4.9427                     | 4.681                      | 3.5395                     | 2.886                      | CEU        |
| KLF12         | GL_21071073-I    | Chr13tp-3D12  | 73413445        | 73578554      | 13         | 254972                      | 420081                    | 5.4055          | 0.3019       | 5.5353                     | 4.448                      | 3.4348                     | 2.802                      | CEU        |
| LOC151261     | GL_29731277-S    | Chr2tp-22E1   | 12733637        | 12937354      | 2          | 511558                      | 715275                    | 8.3575          | 0.4526       | 5.736                      | 4.595                      | 3.5282                     | 2.812                      | CEU        |
| LOC255812     | GL_37550242-S    | Chr3tp-18B6   | 198772060       | 198823587     | 3          | 1881232                     | 1932759                   | 4.9148          | 0.2832       | 5.7169                     | 4.52                       | 3.5952                     | 2.828                      | CEU        |

|           |               |              |           |           |    |          |          |         |        |        |       |        |       |     |
|-----------|---------------|--------------|-----------|-----------|----|----------|----------|---------|--------|--------|-------|--------|-------|-----|
| LOC347981 | GL_30160064-S | Chr6tp-22E5  | 29979075  | 30000296  | 6  | 16532    | 37753    | 6.0065  | 0.3772 | 6.2417 | 4.635 | 3.6649 | 2.949 | CEU |
| LOC374673 | GL_37541248-S | Chr15tp-4E11 | 80920701  | 81107580  | 15 | 398146   | 585025   | 4.4622  | 0.2451 | 5.2355 | 4.403 | 3.4623 | 2.75  | CEU |
| LOC375508 | GL_37552191-S | Chr6tp-2D2   | 41488763  | 41684723  | 6  | -1530831 | -1334871 | 5.0745  | 0.288  | 5.8439 | 4.714 | 3.552  | 2.836 | CEU |
| LOC377296 | GL_37550226-S | Chr5tp-10D12 | 118758898 | 118939349 | 5  | -152109  | 28342    | 4.4885  | 0.2466 | 5.5963 | 4.467 | 3.5766 | 2.931 | CEU |
| LOC388077 | GL_41150141-S | Chr15tp-7C8  | 19932331  | 20097557  | 15 | -17353   | 147873   | 5.6011  | 0.3125 | 5.6223 | 4.415 | 3.3144 | 2.551 | CEU |
| LOC389609 | GL_41148493-S | Chr8tp-3G10  | 2414807   | 2583462   | 8  | -126885  | 41770    | 5.494   | 0.3067 | 5.6249 | 4.689 | 3.5523 | 2.84  | CEU |
| LOC402472 | GL_42658251-S | Chr7tp-19C7  | 28147859  | 28305298  | 7  | -75575   | 81864    | 6.1995  | 0.3593 | 6.6019 | 5.52  | 4.2173 | 3.184 | CEU |
| MAP3K1    | GL_37550278-S | Chr5tp-16D7  | 55205360  | 55361836  | 5  | -1022144 | -865668  | 5.3563  | 0.3037 | 6.136  | 4.708 | 3.6061 | 2.875 | CEU |
| MGC10871  | GL_32306518-S | Chr11tp-3F10 | 68042930  | 68231187  | 11 | 1853623  | 2041880  | 4.9551  | 0.277  | 6.2863 | 4.724 | 3.5973 | 2.8   | CEU |
| MGC41943  | GL_34222265-S | Chr7tp-5B10  | 143412957 | 143479566 | 7  | 624842   | 691451   | 8.2551  | 0.4422 | 5.7044 | 4.455 | 3.4557 | 2.79  | CEU |
| MGC72075  | GL_40217629-S | Chr7tp-4E8   | 23171705  | 23350234  | 7  | -332731  | -154202  | 4.5861  | 0.2522 | 7.2445 | 4.45  | 3.5063 | 2.822 | CEU |
| MLAT4     | GL_27764881-S | Chr3tp-25A11 | 191281358 | 191439015 | 3  | 123745   | 281402   | 5.6998  | 0.3133 | 6.5443 | 4.732 | 3.5731 | 2.897 | CEU |
| MYO6      | GL_4826845-S  | Chr6tp-12E12 | 76960072  | 77052124  | 6  | 277962   | 370014   | 5.4732  | 0.3012 | 5.5246 | 4.605 | 3.5586 | 2.825 | CEU |
| NR2F2     | GL_31377723-S | Chr15tp-1A12 | 94219335  | 94391192  | 15 | -463311  | -291454  | 5.7068  | 0.3229 | 5.8242 | 4.622 | 3.4907 | 2.723 | CEU |
| PARD3     | GL_21361830-S | Chr10tp-8G5  | 34331883  | 34471421  | 10 | -108407  | 31131    | 8.1555  | 0.4322 | 5.2362 | 4.821 | 3.6779 | 2.923 | CEU |
| PDGFD     | GL_15451920-A | Chr11tp-2C9  | 103571728 | 103753945 | 11 | 288170   | 470387   | 5.1246  | 0.2823 | 5.592  | 4.659 | 3.6447 | 2.971 | CEU |
| PDPR      | GL_32261325-S | Chr16tp-9C8  | 68690128  | 68870723  | 16 | -62302   | 118293   | 9.1346  | 0.4798 | 5.6945 | 4.585 | 3.4252 | 2.762 | CEU |
| PDZGEF1   | GL_7657260-S  | Chr4tp-4A12  | 160580983 | 160741167 | 4  | -57683   | 102501   | 5.1198  | 0.282  | 5.7027 | 5.003 | 3.5669 | 2.837 | CEU |
| PRICKLE2  | GL_38524619-S | Chr3tp-25F4  | 63835343  | 64013188  | 3  | -219441  | -41596   | 7.5696  | 0.4057 | 7.488  | 5.067 | 3.7314 | 2.907 | CEU |
| PTPLA     | GL_18104975-S | Chr10tp-10E3 | 18732345  | 18910853  | 10 | 1056006  | 1234514  | 4.3273  | 0.2373 | 5.0961 | 4.297 | 3.4588 | 2.796 | CEU |
| PTPRK     | GL_18860901-S | Chr6tp-10H9  | 128448580 | 128633213 | 6  | 116589   | 301222   | 5.2841  | 0.291  | 5.4683 | 4.542 | 3.6061 | 2.894 | CEU |
| RASSF6    | GL_41393612-A | Chr4tp-9D11  | 74797930  | 75012988  | 4  | -18144   | 196914   | 5.0114  | 0.2802 | 6.2163 | 4.94  | 3.5063 | 2.821 | CEU |
| RGNEF     | GL_37550356-S | Chr5tp-20B6  | 73002547  | 73197422  | 5  | -270933  | -76058   | 4.8891  | 0.2692 | 5.6798 | 4.56  | 3.5703 | 2.886 | CEU |
| SIGLEC5   | GL_4502658-S  | Chr19tp-7A10 | 56783548  | 56958512  | 19 | -23686   | 151278   | 4.692   | 0.2703 | 5.2413 | 4.547 | 3.3199 | 2.687 | CEU |
| SLC2A13   | GL_16418394-S | Chr12tp-2E5  | 38991138  | 39141490  | 12 | 551941   | 702293   | 7.2523  | 0.3909 | 6.4456 | 4.821 | 3.6189 | 2.867 | CEU |
| SMN2      | GL_13259530-A | Chr5tp-3F4   | 70234598  | 70425468  | 5  | 825985   | 1016855  | 5.6857  | 0.3125 | 5.0157 | 4.448 | 3.3641 | 2.674 | CEU |
| SNRPB2    | GL_38149980-A | Chr20tp-6C10 | 16170259  | 16336536  | 20 | -495767  | -329490  | 5.666   | 0.3115 | 5.7404 | 5.053 | 3.8076 | 2.956 | CEU |
| SNRPD1    | GL_28416941-S | Chr18tp-3B2  | 18532199  | 18719572  | 18 | 1068365  | 1255738  | 4.308   | 0.2598 | 5.5867 | 4.241 | 3.2985 | 2.629 | CEU |
| STEAP     | GL_22027487-S | Chr7tp-23B4  | 89160969  | 89355308  | 7  | -277662  | -83323   | 6.2721  | 0.3429 | 5.3442 | 4.599 | 3.5779 | 2.869 | CEU |
| STEAP2    | GL_25092600-S | Chr7tp-23B4  | 89160969  | 89355308  | 7  | -350142  | -155803  | 7.4433  | 0.3998 | 6.5135 | 4.824 | 3.5565 | 2.866 | CEU |
| TMPIT     | GL_13994299-S | Chr7tp-17H6  | 75169293  | 75327473  | 7  | -91866   | 66314    | 4.4778  | 0.246  | 5.9645 | 4.418 | 3.302  | 2.671 | CEU |
| TNFRSF11B | GL_22547122-S | Chr8tp-5B6   | 120020198 | 120167611 | 8  | 14463    | 161876   | 6.7894  | 0.3737 | 6.1499 | 4.648 | 3.6132 | 2.813 | CEU |
| TOX       | GL_42658956-S | Chr8tp-3E1   | 60223828  | 60381578  | 8  | 343129   | 500879   | 5.6795  | 0.3122 | 6.4618 | 4.586 | 3.5761 | 2.878 | CEU |
| UBE2E2    | GL_22749326-S | Chr3tp-22C11 | 23991826  | 24167234  | 3  | 384915   | 560323   | 4.7944  | 0.2639 | 5.9614 | 4.516 | 3.6421 | 2.882 | CEU |
| UCHL5     | GL_7706752-S  | Chr1tp-10F8  | 190899097 | 191041651 | 1  | 1182121  | 1324675  | 4.8727  | 0.2683 | 5.4862 | 4.435 | 3.4676 | 2.786 | CEU |
| UGT2B10   | GL_27552756-S | Chr4tp-1F2   | 69075001  | 69230647  | 4  | -802255  | -646609  | 5.2344  | 0.311  | 5.9642 | 4.227 | 3.4391 | 2.768 | CEU |
| UGT2B11   | GL_4507822-S  | Chr4tp-23H10 | 69126468  | 69296476  | 4  | -1120655 | -950647  | 14.7246 | 0.6671 | 5.8267 | 4.565 | 3.5246 | 2.772 | CEU |
| UGT2B17   | GL_4507820-S  | Chr4tp-23H10 | 69126468  | 69296476  | 4  | -105361  | 64647    | 15.0078 | 0.6746 | 5.364  | 4.524 | 3.5444 | 2.874 | CEU |
| UGT2B7    | GL_4507824-S  | Chr4tp-23H10 | 69126468  | 69296476  | 4  | -1032588 | -862580  | 13.9271 | 0.6451 | 5.6211 | 4.482 | 3.5341 | 2.754 | CEU |
| AGPAT3    | GL_41327762-S | Chr21tp-3B9  | 44273354  | 44465672  | 21 | 46626    | 238944   | 5.2365  | 0.3831 | 5.3572 | 4.631 | 3.3816 | 2.623 | CHB |
| AIP       | GL_4502008-S  | Chr11tp-2H4  | 66670500  | 66843551  | 11 | -344542  | -171491  | 4.6304  | 0.3346 | 5.0452 | 4.393 | 3.4765 | 2.79  | CHB |
| BIRC1     | GL_4758751-S  | Chr5tp-3A5   | 69485603  | 69650298  | 5  | 60291    | 224986   | 5.3367  | 0.3755 | 5.4139 | 4.631 | 3.3567 | 2.678 | CHB |
| BUB1B     | GL_20149508-S | Chr15tp-5C7  | 38061792  | 38223585  | 15 | -238443  | -76650   | 5.0035  | 0.3535 | 5.8117 | 4.314 | 3.5684 | 2.843 | CHB |
| C14orf110 | GL_7661757-S  | Chr14tp-11E8 | 104367765 | 104533191 | 14 | -1090365 | -924939  | 3.997   | 0.2888 | 4.9369 | 3.772 | 2.7291 | 1.994 | CHB |
| C14orf116 | GL_20127573-S | Chr14tp-11E4 | 89100485  | 89263148  | 14 | 408005   | 570668   | 5.9495  | 0.4215 | 5.7411 | 4.988 | 3.6323 | 2.883 | CHB |
| CGI-96    | GL_25092724-S | Chr22tp-8C6  | 41225348  | 41326639  | 22 | -7936    | 93355    | 5.2361  | 0.3759 | 5.6491 | 5.05  | 3.9356 | 3.061 | CHB |
| CHES1     | GL_4885136-S  | Chr14tp-11E4 | 89100485  | 89263148  | 14 | 402549   | 565212   | 5.4908  | 0.3925 | 6.813  | 4.501 | 3.5511 | 2.833 | CHB |
| COX7A2L   | GL_18105036-S | Chr2tp-29D3  | 41557419  | 41714286  | 2  | -932337  | -775470  | 5.0276  | 0.3551 | 5.103  | 4.536 | 3.5652 | 2.844 | CHB |
| FLJ20442  | GL_32261290-S | Chr3tp-22G12 | 155783429 | 155942113 | 1  | -781889  | -623205  | 4.3848  | 0.3235 | 5.3022 | 4.359 | 3.4656 | 2.779 | CHB |
| FLJ45909  | GL_38348205-S | Chr1tp-7F8   | 148862241 | 149032869 | 1  | 731345   | 901973   | 4.5211  | 0.3205 | 5.7251 | 4.303 | 3.4968 | 2.777 | CHB |
| GTF2E1    | GL_5031726-S  | Chr3tp-5F1   | 120684354 | 120844091 | 3  | -1299796 | -1140059 | 4.9976  | 0.3531 | 5.6214 | 4.685 | 3.7568 | 2.987 | CHB |
| HIST1H4B  | GL_21166392-S | Chr6tp-2A12  | 24146928  | 24331276  | 6  | -1988457 | -1804109 | 4.8964  | 0.353  | 5.9421 | 4.747 | 3.618  | 2.844 | CHB |
| HLA-DQA2  | GL_11095446-S | Chr6tp-5C11  | 32503398  | 32593944  | 6  | -317635  | -227089  | 11.5728 | 0.6759 | 4.7611 | 4.016 | 3.1718 | 2.501 | CHB |
| HLA-DRB5  | GL_26665892-S | Chr6tp-5C11  | 32503398  | 32593944  | 6  | -89827   | 719      | 7.4891  | 0.5011 | 5.4316 | 4.349 | 3.2159 | 2.505 | CHB |
| hmm28653  | hmm28653-S    | Chr2tp-19A8  | 209447808 | 209628092 | 2  | -666939  | -486655  | 5.1026  | 0.367  | 6.6172 | 4.483 | 3.4576 | 2.779 | CHB |
| hmm29193  | hmm29193-S    | Chr3tp-28E4  | 70463875  | 70639306  | 3  | -1165545 | -990114  | 4.5188  | 0.3267 | 5.7504 | 4.462 | 3.5699 | 2.903 | CHB |

|              |               |              |           |           |    |          |          |         |        |        |       |        |       |     |
|--------------|---------------|--------------|-----------|-----------|----|----------|----------|---------|--------|--------|-------|--------|-------|-----|
| Hs.287709    | Hs.287709-S   | Chr22tp-8E4  | 37493053  | 37629009  | 22 | 731047   | 867003   | 4.7152  | 0.334  | 5.5718 | 4.517 | 3.5315 | 2.862 | CHB |
| KIAA0220     | GL_42660956-S | Chr16tp-8B1  | 22503592  | 22679810  | 16 | 48560    | 224778   | 7.1145  | 0.4977 | 5.2218 | 4.361 | 3.4305 | 2.765 | CHB |
| LMAN1        | GL_10862689-S | Chr18tp-9D2  | 53998291  | 54169211  | 18 | -1150071 | -979151  | 4.9322  | 0.3554 | 5.2811 | 4.526 | 3.4642 | 2.788 | CHB |
| LOC149603    | GL_37548531-S | Chr1tp-35G3  | 225050847 | 225160564 | 1  | 63328    | 173045   | 4.9043  | 0.3469 | 5.3396 | 4.504 | 3.5861 | 2.868 | CHB |
| LOC283820    | GL_27734708-S | Chr16tp-6D2  | 18108163  | 18293192  | 16 | 1812140  | 1997169  | 4.9039  | 0.3604 | 5.7175 | 4.087 | 3.4814 | 2.765 | CHB |
| LOC339088    | GL_37541953-S | Chr16tp-3A9  | 30109781  | 30290781  | 16 | 736563   | 917563   | 4.9573  | 0.3572 | 6.4029 | 4.407 | 3.4075 | 2.727 | CHB |
| LOC388077    | GL_41150141-S | Chr15tp-7C8  | 19932331  | 20097557  | 15 | -17353   | 147873   | 6.8608  | 0.4672 | 5.0463 | 4.085 | 3.3407 | 2.553 | CHB |
| LOC388440    | GL_42661316-S | Chr17tp-11A1 | 31309398  | 31466733  | 17 | -145880  | 11455    | 5.2236  | 0.3681 | 5.3829 | 4.503 | 3.597  | 2.863 | CHB |
| LOC392218    | GL_41148741-S | Chr8tp-17A3  | 48525949  | 48706581  | 8  | -1460144 | -1279512 | 4.6498  | 0.3295 | 5.3675 | 4.441 | 3.578  | 2.842 | CHB |
| LOC400543    | GL_42660801-S | Chr16tp-8B1  | 22503592  | 22679810  | 16 | 101320   | 277538   | 7.0287  | 0.4929 | 5.1864 | 4.443 | 3.4898 | 2.739 | CHB |
| MGC12760     | GL_34147433-S | Chr1tp-25H8  | 16637922  | 16784062  | 1  | -52396   | 93744    | 8.0881  | 0.5488 | 6.0214 | 4.685 | 3.683  | 2.852 | CHB |
| MGC26717     | GL_34222236-S | Chr3tp-27A3  | 87431797  | 87596645  | 3  | -856734  | -691886  | 4.82    | 0.3412 | 6.0931 | 4.621 | 3.4966 | 2.844 | CHB |
| MGC41943     | GL_34222265-S | Chr7tp-7H4   | 143283127 | 143413156 | 7  | 495012   | 625041   | 4.7936  | 0.3459 | 5.879  | 4.509 | 3.5508 | 2.823 | CHB |
| MGC45491     | GL_23397533-S | Chr6tp-3B11  | 42815771  | 42914110  | 6  | -1265048 | -1166709 | 4.6421  | 0.3637 | 5.7331 | 4.575 | 3.5734 | 2.855 | CHB |
| MGC5178      | GL_30089944-A | Chr16tp-9D2  | 29248712  | 29449523  | 16 | -128220  | 72591    | 4.5664  | 0.3301 | 5.6629 | 4.468 | 3.4693 | 2.771 | CHB |
| NDUFB4       | GL_40806201-S | Chr3tp-5F1   | 120684354 | 120844091 | 3  | -1113553 | -953816  | 5.429   | 0.3814 | 5.9631 | 4.813 | 3.7308 | 2.973 | CHB |
| NMNAT3       | GL_31342325-S | Chr3tp-5B8   | 140942616 | 141096384 | 3  | 180753   | 334521   | 5.0202  | 0.3614 | 5.7614 | 4.884 | 3.8354 | 3.031 | CHB |
| NPIP         | GL_5902013-S  | Chr16tp-9F3  | 14789257  | 14970746  | 16 | 61772    | 243261   | 5.4541  | 0.3902 | 6.7094 | 4.827 | 3.7193 | 2.941 | CHB |
| PDPR         | GL_32261325-S | Chr16tp-9C8  | 68690128  | 68870723  | 16 | -62302   | 118293   | 11.4405 | 0.6888 | 6.2231 | 5.029 | 3.7497 | 2.95  | CHB |
| PM5          | GL_10947030-S | Chr16tp-9F3  | 14789257  | 14970746  | 16 | -108109  | 73380    | 5.6759  | 0.4044 | 7.2742 | 4.449 | 3.495  | 2.781 | CHB |
| SMN1         | GL_13259511-A | Chr5tp-2H6   | 70072978  | 70197304  | 5  | 663882   | 788208   | 7.9531  | 0.5333 | 4.8908 | 4.444 | 3.4571 | 2.703 | CHB |
| SMN2         | GL_13259530-A | Chr5tp-2H6   | 70072978  | 70197304  | 5  | 664365   | 788691   | 9.3678  | 0.5994 | 6.2077 | 4.527 | 3.5195 | 2.777 | CHB |
| SULT1A3      | GL_29550920-A | Chr16tp-3A9  | 30109781  | 30290781  | 16 | 726249   | 907249   | 5.6374  | 0.4019 | 5.6376 | 4.474 | 3.5115 | 2.772 | CHB |
| UGT2B10      | GL_27552756-S | Chr4tp-23H10 | 69126468  | 69296476  | 4  | -750788  | -580780  | 7.5642  | 0.5308 | 5.1892 | 4.377 | 3.4914 | 2.774 | CHB |
| UGT2B11      | GL_4507822-S  | Chr4tp-23H10 | 69126468  | 69296476  | 4  | -1120655 | -950647  | 14.9269 | 0.7971 | 6.2696 | 4.666 | 3.5649 | 2.756 | CHB |
| UGT2B17      | GL_4507820-S  | Chr4tp-23H10 | 69126468  | 69296476  | 4  | -105361  | 64647    | 15.7922 | 0.8163 | 5.8966 | 4.547 | 3.6106 | 2.823 | CHB |
| UGT2B7       | GL_4507824-S  | Chr4tp-23H10 | 69126468  | 69296476  | 4  | -1032588 | -862580  | 14.1214 | 0.7776 | 5.1428 | 4.354 | 3.4034 | 2.73  | CHB |
| APOBEC3B     | GL_22907024-S | Chr22tp-2A6  | 37604699  | 37805841  | 22 | -105332  | 95810    | 5.0251  | 0.3618 | 5.0295 | 4.578 | 3.5463 | 2.927 | JPT |
| ATP5A1       | GL_23346425-S | Chr18tp-1F6  | 42005019  | 42163425  | 18 | 84822    | 243228   | 4.6171  | 0.3272 | 4.8094 | 4.323 | 3.5462 | 2.802 | JPT |
| BYSL         | GL_15208644-S | Chr6tp-6H11  | 41696767  | 41807431  | 6  | -311709  | -201045  | 4.187   | 0.3028 | 4.9837 | 4.11  | 3.4359 | 2.783 | JPT |
| CENPA        | GL_4585861-S  | Chr2tp-20B5  | 27972987  | 28136281  | 2  | 1044204  | 1207498  | 4.7281  | 0.3349 | 6.8115 | 4.274 | 3.3786 | 2.754 | JPT |
| CGI-96       | GL_25092724-S | Chr22tp-8C6  | 41225348  | 41326639  | 22 | -7936    | 93355    | 6.1055  | 0.4234 | 5.9416 | 4.978 | 3.6217 | 2.912 | JPT |
| COPZ1        | GL_7706336-S  | Chr12tp-11C6 | 53033144  | 53231483  | 12 | 1581     | 199920   | 5.012   | 0.3679 | 5.0924 | 4.358 | 3.5238 | 2.844 | JPT |
| DEDD         | GL_14670395-A | Chr1tp-8C10  | 156169069 | 156313869 | 1  | -1735521 | -1590721 | 4.4998  | 0.3191 | 6.3865 | 4.489 | 3.436  | 2.727 | JPT |
| DKFZP572C163 | GL_42822888-S | Chr9tp-2A1   | 41194015  | 41282840  | 9  | -1021083 | -932258  | 5.7335  | 0.4007 | 4.5863 | 3.98  | 2.9101 | 2.225 | JPT |
| DMPK         | GL_4758173-S  | Chr19tp-4E7  | 49484154  | 49639855  | 19 | -1480803 | -1325102 | 4.4958  | 0.3188 | 7.1089 | 4.33  | 3.3458 | 2.638 | JPT |
| FBXO2        | GL_15812197-S | Chr1tp-23D2  | 11639235  | 11815970  | 1  | -3689    | 173046   | 5.0459  | 0.3632 | 5.7104 | 4.535 | 3.5063 | 2.816 | JPT |
| FLJ00332     | GL_38348347-S | Chr11tp-14A2 | 65980446  | 66140055  | 11 | -953527  | -793918  | 4.3998  | 0.3182 | 6.086  | 4.383 | 3.5094 | 2.834 | JPT |
| GBP3         | GL_24308156-S | Chr1tp-29F3  | 89124089  | 89189073  | 1  | -61102   | 3882     | 6.474   | 0.4452 | 5.9659 | 4.665 | 3.5973 | 2.917 | JPT |
| GTF2H2       | GL_31747573-S | Chr5tp-13C10 | 69552855  | 69710868  | 5  | 634996   | 793009   | 4.601   | 0.3261 | 6.7346 | 4.539 | 3.4011 | 2.701 | JPT |
| HAN11        | GL_5031728-S  | Chr17tp-2C9  | 60529898  | 60693483  | 17 | 1509665  | 1673250  | 4.8487  | 0.3431 | 5.7882 | 4.685 | 3.5645 | 2.857 | JPT |
| HLA-DQA2     | GL_11095446-S | Chr6tp-5C11  | 32503398  | 32593944  | 6  | -317635  | -227089  | 9.1094  | 0.5794 | 5.0611 | 4.197 | 3.1648 | 2.498 | JPT |
| HLA-DRB5     | GL_26665892-S | Chr6tp-5C11  | 32503398  | 32593944  | 6  | -89827   | 719      | 5.6106  | 0.393  | 6.3063 | 4.195 | 3.2272 | 2.559 | JPT |
| hmm21257     | hmm21257-S    | Chr12tp-20B2 | 38644006  | 38815857  | 12 | -260600  | -88749   | 5.0927  | 0.3663 | 6.1368 | 4.865 | 3.6278 | 2.858 | JPT |
| hmm35285     | hmm35285-S    | Chr5tp-20C10 | 812176    | 991126    | 9  | -564233  | -385283  | 4.6086  | 0.333  | 5.5329 | 4.409 | 3.4516 | 2.711 | JPT |
| Hs.137868    | Hs.137868-S   | Chr5tp-20C5  | 116721255 | 116886886 | 5  | -419087  | -253456  | 5.0253  | 0.355  | 5.4226 | 4.331 | 3.6141 | 2.924 | JPT |
| Hs.460059    | Hs.460059-S   | Chr16tp-2E3  | 16652556  | 16831289  | 16 | 1795976  | 1974709  | 5.8012  | 0.4049 | 6.7408 | 5.54  | 4.166  | 3.114 | JPT |
| Hs.489160    | Hs.489160-S   | Chr7tp-4B2   | 95703082  | 95756209  | 7  | 1392536  | 1445663  | 4.7342  | 0.3556 | 5.5807 | 4.502 | 3.5832 | 2.858 | JPT |
| Hs.495177    | Hs.495177-S   | Chr14tp-12C8 | 21867480  | 22006855  | 14 | 126519   | 265894   | 4.3875  | 0.3111 | 6.2287 | 4.123 | 3.3225 | 2.665 | JPT |
| KIAA0220     | GL_42660956-S | Chr16tp-12F7 | 21408063  | 21559206  | 16 | -1046969 | -895826  | 6.5711  | 0.4587 | 6.1212 | 4.361 | 3.5263 | 2.811 | JPT |
| KIAA1093     | GL_27501258-S | Chr22tp-10B2 | 37049837  | 37145940  | 22 | -1993880 | -1897777 | 5.1509  | 0.3633 | 6.45   | 4.8   | 3.579  | 2.909 | JPT |
| LOC283820    | GL_27734708-S | Chr16tp-6G1  | 18108163  | 18293192  | 16 | 1812140  | 1997169  | 5.8283  | 0.4065 | 5.4582 | 4.95  | 3.6738 | 2.849 | JPT |
| LOC347981    | GL_30160064-S | Chr6tp-5H5   | 29767504  | 29916283  | 6  | -195039  | -46260   | 6.4983  | 0.4466 | 5.4728 | 4.395 | 3.2969 | 2.557 | JPT |
| LOC374395    | GL_37541013-S | Chr11tp-16B4 | 63724994  | 63889434  | 11 | 1411569  | 1576009  | 4.799   | 0.3463 | 5.2915 | 4.491 | 3.5746 | 2.815 | JPT |
| LOC375418    | GL_40786421-S | Chr4tp-16B12 | 157403341 | 157547216 | 4  | 1801845  | 1945720  | 6.4303  | 0.4427 | 5.201  | 4.606 | 3.5207 | 2.818 | JPT |
| LOC378157    | GL_37539180-S | Chr7tp-13D1  | 43725779  | 43830031  | 7  | -71619   | 32633    | 10.0615 | 0.6196 | 5.6432 | 4.678 | 3.5369 | 2.811 | JPT |

|              |                |               |           |           |    |          |          |         |        |        |       |        |       |     |
|--------------|----------------|---------------|-----------|-----------|----|----------|----------|---------|--------|--------|-------|--------|-------|-----|
| LOC388077    | GL_411510141-S | Chr15tp-7C8   | 19932331  | 20097557  | 15 | -17353   | 147873   | 8.1058  | 0.5324 | 6.4667 | 4.717 | 3.3907 | 2.66  | JPT |
| LOC388457    | GL_42661337-S  | Chr18tp-3G7   | 3109560   | 3288371   | 18 | 418806   | 597617   | 5.8139  | 0.4057 | 6.1445 | 4.709 | 3.6828 | 2.917 | JPT |
| LOC400566    | GL_42661283-S  | Chr17tp-3G4   | 1335634   | 1530629   | 17 | 1070992  | 1265987  | 4.0212  | 0.3383 | 4.4672 | 3.971 | 3.0686 | 2.386 | JPT |
| LOC402488    | GL_42658295-S  | Chr7tp-13D1   | 43725779  | 43830031  | 7  | -73281   | 30971    | 7.8345  | 0.5189 | 5.2606 | 4.475 | 3.5474 | 2.809 | JPT |
| LOC55871     | GL_13236498-S  | Chr9tp-4C8    | 356138    | 537316    | 9  | 244629   | 425807   | 4.5383  | 0.3217 | 7.6292 | 4.08  | 3.2231 | 2.566 | JPT |
| MCOLN1       | GL_10092596-S  | Chr19tp-5B1   | 6199888   | 6359433   | 19 | -1304810 | -1145265 | 4.3702  | 0.3161 | 5.1395 | 3.904 | 3.1077 | 2.445 | JPT |
| MGC12760     | GL_34147433-S  | Chr1tp-25H9   | 16752898  | 16870964  | 1  | 62580    | 180646   | 6.958   | 0.4726 | 6.8464 | 5.068 | 3.6624 | 2.899 | JPT |
| MGC1842      | GL_42662435-S  | Chr22tp-2D1   | 24269780  | 24491286  | 22 | 1008619  | 1230125  | 5.106   | 0.3672 | 5.0939 | 4.365 | 3.424  | 2.672 | JPT |
| MGC42630     | GL_31341689-S  | Chr9tp-13D1   | 42650537  | 42928370  | 9  | -1547928 | -1270095 | 6.2612  | 0.4327 | 6.1683 | 4.467 | 3.1576 | 2.28  | JPT |
| NMT1         | GL_39725674-S  | Chr17tp-3F3   | 40552637  | 40737608  | 17 | 10961    | 195932   | 6.3393  | 0.4788 | 5.1297 | 4.248 | 3.3791 | 2.721 | JPT |
| Nup37        | GL_34222120-S  | Chr12tp-5B6   | 99810968  | 100007844 | 12 | -1159664 | -962788  | 4.7761  | 0.3382 | 5.0175 | 4.547 | 3.5807 | 2.917 | JPT |
| PM5          | GL_10947030-S  | Chr16tp-2E3   | 16652556  | 16831289  | 16 | 1755190  | 1933923  | 5.8061  | 0.4052 | 6.2469 | 4.655 | 3.5927 | 2.86  | JPT |
| POLR1C       | GL_42560249-A  | Chr6tp-6H11   | 41696767  | 41807431  | 6  | -1899677 | -1789013 | 4.4886  | 0.3245 | 5.8111 | 4.451 | 3.5335 | 2.799 | JPT |
| RAD9A        | GL_19924112-S  | Chr11tp-2F7   | 66841191  | 66872614  | 11 | -80933   | -49510   | 5.2194  | 0.3972 | 5.7707 | 4.537 | 3.5281 | 2.807 | JPT |
| RPL36        | GL_16117795-A  | Chr19tp-5C2   | 4739180   | 4897550   | 19 | -903435  | -745065  | 4.4185  | 0.326  | 6.7085 | 4.033 | 3.0967 | 2.324 | JPT |
| SCNM1        | GL_13128997-S  | Chr1tp-31C6   | 149067874 | 149151422 | 1  | 1114099  | 1197647  | 4.8816  | 0.3453 | 5.7685 | 4.453 | 3.4639 | 2.73  | JPT |
| SDHC         | GL_9257243-S   | Chr1tp-8C10   | 156169069 | 156313869 | 1  | -1976781 | -1831981 | 6.6654  | 0.4562 | 5.3767 | 4.452 | 3.4556 | 2.776 | JPT |
| SENP3        | GL_21361498-S  | Chr17tp-4B11  | 7042348   | 7223586   | 17 | -373379  | -192141  | 6.4006  | 0.4567 | 6.3244 | 4.545 | 3.4803 | 2.822 | JPT |
| SMN1         | GL_13259511-A  | Chr5tp-2H6    | 70072978  | 70197304  | 5  | 663882   | 788208   | 5.3414  | 0.3758 | 5.2103 | 4.414 | 3.3782 | 2.659 | JPT |
| SMN2         | GL_13259530-A  | Chr5tp-2H6    | 70072978  | 70197304  | 5  | 664365   | 788691   | 6.9629  | 0.4728 | 7.4926 | 4.586 | 3.5472 | 2.8   | JPT |
| SSNA1        | GL_4505324-S   | Chr9tp-3E10   | 136125999 | 136283272 | 9  | -1234420 | -1077147 | 4.5754  | 0.3307 | 5.7194 | 4.07  | 3.273  | 2.594 | JPT |
| TOMM40       | GL_5174722-S   | Chr19tp-4E7   | 49484154  | 49639855  | 19 | -614300  | -458599  | 6.0878  | 0.4224 | 5.2396 | 4.196 | 3.401  | 2.682 | JPT |
| UBE2G2       | GL_33359699-A  | Chr21tp-1E12  | 46607928  | 46756333  | 21 | 1594331  | 1742736  | 4.9607  | 0.3574 | 5.6648 | 4.082 | 3.1817 | 2.513 | JPT |
| UGT2B10      | GL_27552756-S  | Chr4tp-23H10  | 69126468  | 69296476  | 4  | -750788  | -580780  | 14.2091 | 0.7632 | 5.3862 | 4.55  | 3.4658 | 2.76  | JPT |
| UGT2B11      | GL_4507822-S   | Chr4tp-23H10  | 69126468  | 69296476  | 4  | -1120655 | -950647  | 21.039  | 0.8876 | 5.1869 | 4.332 | 3.4551 | 2.72  | JPT |
| UGT2B17      | GL_4507820-S   | Chr4tp-23H10  | 69126468  | 69296476  | 4  | -105361  | 64647    | 21.7175 | 0.8957 | 5.5734 | 4.516 | 3.5404 | 2.8   | JPT |
| UGT2B7       | GL_4507824-S   | Chr4tp-23H10  | 69126468  | 69296476  | 4  | -1032588 | -862580  | 20.6757 | 0.8831 | 5.2161 | 4.51  | 3.4536 | 2.752 | JPT |
| WDR21        | GL_31317285-A  | Chr14tp-2D8   | 74386054  | 74589417  | 14 | 1890400  | 2093763  | 4.731   | 0.3483 | 5.3995 | 4.189 | 3.4407 | 2.812 | JPT |
| XAB1         | GL_14149628-S  | Chr2tp-20B5   | 27972987  | 28136281  | 2  | 187859   | 351153   | 4.8347  | 0.3422 | 5.7698 | 4.499 | 3.5036 | 2.785 | JPT |
| AFG3L2       | GL_5802969-S   | Chr18tp-4G4   | 13810695  | 13953988  | 18 | 1491313  | 1634606  | 4.9518  | 0.2768 | 5.4651 | 4.591 | 3.5855 | 2.826 | YRI |
| AKR1A1       | GL_24497576-A  | Chr1tp-20C5   | 46007370  | 46165931  | 1  | 302623   | 461184   | 4.9097  | 0.2704 | 5.5989 | 4.712 | 3.5537 | 2.807 | YRI |
| AMD1         | GL_5209326-S   | Chr6tp-15A3   | 111196247 | 111320737 | 6  | -127026  | -2536    | 4.8594  | 0.2676 | 5.4386 | 4.628 | 3.6001 | 2.859 | YRI |
| AP4B1        | GL_5729741-S   | Chr1tp-30F8   | 114433496 | 114570985 | 1  | 283500   | 420989   | 5.9587  | 0.3268 | 6.5679 | 5.635 | 4.776  | 2.464 | YRI |
| ARHA         | GL_10835048-S  | Chr5tp-17G5   | 47858118  | 48047419  | 3  | -1513741 | -1324440 | 4.4821  | 0.2462 | 6.0643 | 4.43  | 3.4609 | 2.731 | YRI |
| ARL10C       | GL_8922600-S   | Chr3tp-20D6   | 5027803   | 5180954   | 3  | -169368  | -16217   | 4.798   | 0.2641 | 4.8576 | 4.301 | 3.4139 | 2.799 | YRI |
| ARPC3        | GL_23397667-S  | Chr12tp-20D8  | 108015022 | 108199720 | 12 | -1320664 | -1135966 | 5.7499  | 0.33   | 7.1513 | 5.016 | 3.7951 | 2.862 | YRI |
| C14orf123    | GL_40548421-S  | Chr14tp-8B2   | 22278362  | 22444232  | 14 | -1470427 | -1304557 | 4.2434  | 0.236  | 5.6853 | 4.178 | 3.3994 | 2.754 | YRI |
| C20orf103    | GL_40804463-S  | Chr20tp-6D6   | 9427891   | 9550775   | 20 | -31127   | 91757    | 5.5391  | 0.3092 | 5.2863 | 4.747 | 3.6561 | 2.893 | YRI |
| C6orf69      | GL_40255181-S  | Chr6tp-5G5    | 34918527  | 35051474  | 6  | -1647347 | -1514400 | 4.8059  | 0.2686 | 5.4811 | 4.534 | 3.5074 | 2.815 | YRI |
| CDC23        | GL_16554575-S  | Chr5tp-22E9   | 137422515 | 137594755 | 5  | -128841  | 43399    | 4.6039  | 0.2532 | 5.6316 | 4.358 | 3.5147 | 2.822 | YRI |
| CGI-96       | GL_25092724-S  | Chr22tp-8C6   | 41225348  | 41326639  | 22 | -7936    | 93355    | 7.9883  | 0.4303 | 7.4911 | 4.726 | 3.6406 | 2.912 | YRI |
| CIRH1A       | GL_14249535-S  | Chr16tp-11H12 | 66655002  | 66809694  | 16 | -1105281 | -950589  | 5.2456  | 0.2932 | 7.2381 | 4.234 | 3.4214 | 2.729 | YRI |
| CLSPN        | GL_21735568-S  | Chr1tp-27A6   | 35476101  | 35593060  | 1  | -395522  | -278563  | 5.626   | 0.3233 | 5.9559 | 4.871 | 3.665  | 2.835 | YRI |
| CYB5-M       | GL_13385593-S  | Chr16tp-11H12 | 66655002  | 66809694  | 16 | -1400032 | -1245340 | 6.6454  | 0.3666 | 5.9232 | 4.494 | 3.4064 | 2.725 | YRI |
| DAAM2        | GL_40548414-S  | Chr6tp-4H9    | 39397275  | 39637314  | 6  | -583218  | -343179  | 5.0049  | 0.2798 | 6.4778 | 4.841 | 3.7317 | 2.949 | YRI |
| DHX33        | GL_20336301-S  | Chr17tp-2C8   | 3671876   | 3830289   | 17 | -1614776 | -1456363 | 5.6127  | 0.3086 | 5.0002 | 4.43  | 3.5055 | 2.798 | YRI |
| DHX37        | GL_29029600-S  | Chr12tp-7D11  | 122098129 | 122246939 | 12 | -1858170 | -1709360 | 4.7337  | 0.2685 | 6.8876 | 4.538 | 3.6046 | 2.811 | YRI |
| DKFZp434N035 | GL_14149994-S  | Chr22tp-7B3   | 17363351  | 17407078  | 22 | -2020023 | -1976296 | 6.6283  | 0.3658 | 6.3186 | 4.509 | 3.4139 | 2.697 | YRI |
| DKFZp762C186 | GL_22062495-S  | Chr11tp-5B8   | 63363053  | 63569797  | 11 | -1753604 | -1546860 | 4.8092  | 0.2688 | 5.5153 | 4.456 | 3.4763 | 2.727 | YRI |
| EIF3S4       | GL_4503516-S   | Chr19tp-5G1   | 8072715   | 8276904   | 19 | -2014668 | -1810479 | 4.7369  | 0.2607 | 5.8574 | 4.544 | 3.2848 | 2.608 | YRI |
| ELKS         | GL_38045893-A  | Chr12tp-10D8  | 2969428   | 3145565   | 12 | 1496872  | 1673009  | 5.3873  | 0.3101 | 5.4161 | 4.539 | 3.4821 | 2.745 | YRI |
| ETF1         | GL_4759033-S   | Chr5tp-22E9   | 137422515 | 137594755 | 5  | -447720  | -275480  | 5.0665  | 0.2791 | 6.0418 | 4.614 | 3.5625 | 2.832 | YRI |
| ETV4         | GL_24307882-S  | Chr17tp-2G5   | 38491053  | 38601721  | 17 | -469999  | -359331  | 4.9819  | 0.2744 | 5.6916 | 4.603 | 3.5285 | 2.82  | YRI |
| FCHO1        | GL_29789053-S  | Chr19tp-4C8   | 16541755  | 16705788  | 19 | -1218547 | -1054514 | 5.4592  | 0.3004 | 5.3796 | 4.357 | 3.33   | 2.602 | YRI |
| FLJ11286     | GL_8922978-S   | Chr19tp-5G1   | 8072715   | 8276904   | 19 | -1992142 | -1787953 | 4.7771  | 0.263  | 6.2737 | 4.701 | 3.377  | 2.613 | YRI |
| FLJ12455     | GL_11545792-S  | Chr1tp-26E12  | 28184670  | 28217009  | 1  | 1283510  | 1315849  | 7.0497  | 0.3865 | 6.0523 | 4.923 | 3.6382 | 2.851 | YRI |

|           |               |               |           |           |    |          |          |         |        |        |       |        |       |     |
|-----------|---------------|---------------|-----------|-----------|----|----------|----------|---------|--------|--------|-------|--------|-------|-----|
| FLJ14466  | GL_38016942-S | Chr12tp-12C7  | 120538520 | 120689076 | 12 | -3794    | 146762   | 5.0278  | 0.2853 | 4.994  | 4.448 | 3.4962 | 2.773 | YRI |
| FLJ25059  | GL_21450678-S | Chr11tp-4F9   | 64563983  | 64751916  | 11 | 1407603  | 1595536  | 5.296   | 0.2959 | 6.6229 | 4.797 | 3.5115 | 2.829 | YRI |
| FLJ43692  | GL_38348301-S | Chr7tp-7H4    | 143283127 | 143413156 | 7  | -37486   | 92543    | 5.6868  | 0.3171 | 5.8276 | 4.499 | 3.4513 | 2.734 | YRI |
| GCNT1     | GL_34485725-S | Chr9tp-2D2    | 76595419  | 76758995  | 9  | 244101   | 407677   | 6.1957  | 0.3438 | 5.8374 | 4.664 | 3.4787 | 2.747 | YRI |
| GMEB1     | GL_13435374-A | Chr1tp-26F6   | 27386878  | 27464199  | 1  | -1474877 | -1397556 | 6.6993  | 0.3693 | 5.6555 | 4.473 | 3.57   | 2.769 | YRI |
| GTF2E1    | GL_5031726-S  | Chr3tp-19D12  | 123673731 | 123823998 | 3  | 1689581  | 1839848  | 5.5197  | 0.3037 | 5.752  | 4.666 | 3.6837 | 2.96  | YRI |
| HARS      | GL_18201902-S | Chr5tp-19B6   | 139516108 | 139694346 | 5  | -517611  | -339373  | 5.0563  | 0.2785 | 5.3644 | 4.521 | 3.5679 | 2.797 | YRI |
| HEM1      | GL_34485726-S | Chr12tp-17C10 | 51985795  | 52180082  | 12 | -1237121 | -1042834 | 5.0951  | 0.2982 | 6.2778 | 4.811 | 3.5496 | 2.886 | YRI |
| HLA-DQA1  | GL_18426974-S | Chr6tp-22E8   | 32809419  | 32813412  | 6  | 90584    | 94577    | 6.6771  | 0.4143 | 6.1176 | 4.898 | 3.6055 | 2.891 | YRI |
| HLA-DRB5  | GL_26665892-S | Chr6tp-4E2    | 32634806  | 32650604  | 6  | 41581    | 57379    | 10.8926 | 0.5415 | 5.4195 | 4.571 | 3.6035 | 2.869 | YRI |
| HPS6      | GL_31881784-S | Chr10tp-1H2   | 104340398 | 104506997 | 10 | 522794   | 689393   | 4.9283  | 0.2714 | 5.4104 | 4.507 | 3.4879 | 2.735 | YRI |
| Hs.105147 | Hs.105147-S   | Chr17tp-6E1   | 5331201   | 5506598   | 17 | 1213010  | 1388407  | 6.6369  | 0.3611 | 5.7289 | 4.578 | 3.5389 | 2.797 | YRI |
| Hs.135624 | Hs.135624-S   | Chr3tp-6F2    | 178755570 | 178931836 | 3  | -1816190 | -1639924 | 4.8907  | 0.2693 | 5.486  | 4.751 | 3.6804 | 2.899 | YRI |
| Hs.449564 | Hs.449564-S   | Chr22tp-6B8   | 20693407  | 20733158  | 22 | -11926   | 27825    | 6.4528  | 0.352  | 7.4914 | 5.342 | 3.7554 | 2.76  | YRI |
| Hs.462423 | Hs.462423-S   | Chr17tp-2C2   | 18863800  | 19021902  | 17 | -126434  | 31668    | 4.9199  | 0.271  | 5.402  | 4.441 | 3.4653 | 2.771 | YRI |
| Hs.468488 | Hs.468488-S   | Chr10tp-4A6   | 126760588 | 126955018 | 10 | 323990   | 518420   | 4.671   | 0.257  | 6.5086 | 4.456 | 3.4907 | 2.79  | YRI |
| Hs.473730 | Hs.473730-S   | Chr21tp-1H8   | 36765627  | 36936688  | 21 | 280448   | 451509   | 5.2371  | 0.2971 | 5.0234 | 4.541 | 3.4575 | 2.8   | YRI |
| Hs.485352 | Hs.485352-S   | Chr1tp-6G9    | 110647995 | 110811836 | 1  | 632727   | 796568   | 4.8381  | 0.2704 | 5.952  | 4.608 | 3.6521 | 2.968 | YRI |
| Hs.487323 | Hs.487323-S   | Chr2tp-8F2    | 130935780 | 131251570 | 2  | -728390  | -412600  | 4.7445  | 0.2611 | 4.8779 | 4.224 | 3.4558 | 2.728 | YRI |
| Hs.523150 | Hs.523150-S   | Chr1tp-27C12  | 40360418  | 40487326  | 1  | 659187   | 786095   | 4.7705  | 0.2626 | 5.6001 | 4.666 | 3.4963 | 2.819 | YRI |
| IAN4L1    | GL_28416948-S | Chr7tp-16B1   | 149327158 | 149384711 | 7  | -550972  | -493419  | 4.8398  | 0.2665 | 6.0589 | 4.516 | 3.497  | 2.857 | YRI |
| JAM3      | GL_21704285-S | Chr11tp-2A2   | 133022689 | 133217958 | 11 | -504047  | -308778  | 6.7403  | 0.3662 | 9.0656 | 6.068 | 4.3316 | 3.095 | YRI |
| KIAA0252  | GL_34222098-S | Chr15tp-5D2   | 38766143  | 38944390  | 15 | -795993  | -617746  | 4.8173  | 0.2692 | 5.1675 | 4.684 | 3.521  | 2.753 | YRI |
| LOC126598 | GL_37546761-S | Chr1tp-5F6    | 92783031  | 92966868  | 1  | 530069   | 713906   | 4.5545  | 0.2504 | 5.2885 | 4.471 | 3.614  | 2.87  | YRI |
| LOC151963 | GL_31341922-S | Chr3tp-22A11  | 194016261 | 194212650 | 3  | 18694    | 215083   | 5.0469  | 0.278  | 5.5269 | 4.471 | 3.4349 | 2.858 | YRI |
| LOC155340 | GL_37538348-S | Chr7tp-21E5   | 5845548   | 6028567   | 7  | -822428  | -639409  | 4.5443  | 0.2536 | 6.2794 | 4.481 | 3.5262 | 2.767 | YRI |
| LOC255812 | GL_37550242-S | Chr3tp-18B6   | 198772060 | 198823587 | 3  | 1881232  | 1932759  | 7.1673  | 0.4089 | 5.0103 | 4.407 | 3.5933 | 2.853 | YRI |
| LOC347981 | GL_30160064-S | Chr6tp-22A4   | 29900413  | 29981074  | 6  | -62130   | 18531    | 6.4796  | 0.4036 | 5.5303 | 4.455 | 3.6215 | 2.944 | YRI |
| LOC375133 | GL_40786533-S | Chr22tp-7B3   | 17363351  | 17407078  | 22 | -1399415 | -1355688 | 9.9142  | 0.5111 | 6.021  | 4.389 | 3.4702 | 2.75  | YRI |
| LOC378157 | GL_37539180-S | Chr7tp-13D1   | 43725779  | 43830031  | 7  | -71619   | 32633    | 9.6845  | 0.5146 | 4.9606 | 4.558 | 3.5487 | 2.836 | YRI |
| LOC388077 | GL_41150141-S | Chr15tp-7C8   | 19932331  | 20097557  | 15 | -17353   | 147873   | 5.8149  | 0.3386 | 5.1493 | 4.173 | 3.2954 | 2.593 | YRI |
| LOC388673 | GL_41115452-S | Chr1tp-31B7   | 145043332 | 145140950 | 1  | -1346096 | -1248478 | 5.5127  | 0.3078 | 7.2725 | 4.582 | 3.4063 | 2.7   | YRI |
| LOC390113 | GL_41201035-S | Chr11tp-13C10 | 46216957  | 46379340  | 11 | -2025656 | -1863273 | 5.6452  | 0.3195 | 6.012  | 4.65  | 3.6277 | 2.854 | YRI |
| LOC402488 | GL_42658295-S | Chr7tp-13D1   | 43725779  | 43830031  | 7  | -73281   | 30971    | 9.1073  | 0.491  | 5.863  | 4.533 | 3.5641 | 2.808 | YRI |
| LOC51249  | GL_24475971-S | Chr1tp-20C5   | 46007370  | 46165931  | 1  | 178590   | 337151   | 4.4107  | 0.2421 | 5.1927 | 4.381 | 3.498  | 2.786 | YRI |
| LOC55831  | GL_8923856-S  | Chr3tp-10B12  | 10137483  | 10347535  | 3  | 156621   | 366673   | 4.3991  | 0.2451 | 5.1645 | 4.34  | 3.4664 | 2.74  | YRI |
| LOC90987  | GL_29734344-S | Chr8tp-18A7   | 144355201 | 144524781 | 8  | -1563059 | -1393479 | 4.5619  | 0.2546 | 6.4604 | 4.43  | 3.3161 | 2.469 | YRI |
| MASA      | GL_10864016-S | Chr4tp-13H7   | 83714295  | 83899208  | 4  | -24783   | 160130   | 4.7482  | 0.2653 | 5.1107 | 4.721 | 3.6356 | 2.857 | YRI |
| MGC12760  | GL_34147433-S | Chr1tp-25H8   | 16637922  | 16784062  | 1  | -52396   | 93744    | 13.3699 | 0.6355 | 6.1935 | 4.753 | 3.6522 | 2.861 | YRI |
| MGC31967  | GL_28316809-S | Chr9tp-5D9    | 34758158  | 34919696  | 9  | -890547  | -729009  | 4.6108  | 0.2536 | 5.268  | 4.442 | 3.5561 | 2.818 | YRI |
| MRPS22    | GL_16554602-S | Chr3tp-10C7   | 140849541 | 141009102 | 3  | 291013   | 450574   | 4.6585  | 0.2563 | 5.3519 | 4.529 | 3.5772 | 2.873 | YRI |
| MTVR1     | GL_22779872-S | Chr11tp-5B8   | 63363053  | 63569797  | 11 | -1734991 | -1528247 | 4.58    | 0.2556 | 5.2754 | 4.447 | 3.4929 | 2.721 | YRI |
| NASP      | GL_27262629-A | Chr1tp-27E10  | 44959288  | 45130943  | 1  | -794223  | -622568  | 4.7908  | 0.2637 | 6.2405 | 4.523 | 3.5335 | 2.821 | YRI |
| NDUFB10   | GL_4758773-S  | Chr16tp-1G7   | 3800356   | 3965551   | 16 | 1848795  | 2013990  | 6.1779  | 0.3429 | 6.5913 | 4.879 | 3.4885 | 2.68  | YRI |
| NIF3L1BP1 | GL_13376622-S | Chr3tp-20B4   | 65182251  | 65361126  | 3  | 1387405  | 1566280  | 4.805   | 0.2685 | 6.4545 | 4.434 | 3.5779 | 2.846 | YRI |
| NME6      | GL_38564323-S | Chr3tp-26F2   | 49955698  | 50112586  | 3  | 1644718  | 1801606  | 4.3947  | 0.2412 | 5.3973 | 4.353 | 3.298  | 2.66  | YRI |
| NT5C2     | GL_20149601-S | Chr10tp-1E10  | 102751071 | 102953191 | 10 | -2087204 | -1885084 | 4.5539  | 0.2503 | 5.273  | 4.508 | 3.5017 | 2.734 | YRI |
| PARD3     | GL_21361830-S | Chr10tp-4F9   | 34455689  | 34621117  | 10 | 15399    | 180827   | 5.341   | 0.2984 | 5.8674 | 4.816 | 3.6299 | 2.936 | YRI |
| PDF       | GL_11641242-S | Chr16tp-11H12 | 66655002  | 66809694  | 16 | -1266494 | -1111802 | 5.4287  | 0.3032 | 5.4723 | 4.484 | 3.4341 | 2.766 | YRI |
| PDPR      | GL_32261325-S | Chr16tp-9C8   | 68690128  | 68870723  | 16 | -62302   | 118293   | 14.5848 | 0.6765 | 5.4666 | 4.459 | 3.4897 | 2.746 | YRI |
| RAB10     | GL_33695094-S | Chr2tp-13B3   | 27274856  | 27470373  | 2  | 1003049  | 1198566  | 4.5047  | 0.2475 | 5.5601 | 4.29  | 3.455  | 2.79  | YRI |
| RAB8B     | GL_7706562-S  | Chr15tp-10G9  | 62785585  | 62962963  | 15 | 1442549  | 1619927  | 4.8866  | 0.2691 | 5.369  | 4.39  | 3.5254 | 2.846 | YRI |
| RG9MTD1   | GL_8923404-S  | Chr3tp-7H10   | 101385631 | 101585598 | 3  | -1381667 | -1181700 | 5.2077  | 0.2955 | 5.5501 | 4.528 | 3.606  | 2.891 | YRI |
| RIOK1     | GL_23510357-A | Chr6tp-7B2    | 8428714   | 8532326   | 6  | 1065985  | 1169597  | 6.0384  | 0.3456 | 8.525  | 4.664 | 3.5717 | 2.874 | YRI |
| RNF122    | GL_38045930-S | Chr8tp-16E12  | 33802163  | 33956976  | 8  | 277264   | 432077   | 5.3974  | 0.2971 | 5.6556 | 4.642 | 3.6396 | 2.902 | YRI |
| RNGTT     | GL_4506562-S  | Chr6tp-9D8    | 88286018  | 88456272  | 6  | -1090799 | -920545  | 4.9128  | 0.2788 | 5.6281 | 4.707 | 3.7204 | 2.979 | YRI |

|         |               |              |           |           |    |          |         |         |        |        |       |        |       |     |
|---------|---------------|--------------|-----------|-----------|----|----------|---------|---------|--------|--------|-------|--------|-------|-----|
| RNPS1   | GI_18379333-A | Chr16tp-1G7  | 3800356   | 3965551   | 16 | 1556572  | 1721767 | 4.5633  | 0.2547 | 5.9791 | 4.267 | 3.4185 | 2.629 | YRI |
| SAMSN1  | GI_21361921-S | Chr21tp-2F5  | 14448525  | 14618661  | 21 | -331691  | -161555 | 5.8211  | 0.3243 | 5.6841 | 4.693 | 3.4363 | 2.71  | YRI |
| SFRS9   | GI_38016912-S | Chr12tp-1F2  | 120246649 | 120419203 | 12 | 884024   | 1056578 | 5.9492  | 0.331  | 6.6093 | 4.362 | 3.5095 | 2.834 | YRI |
| SIAT8A  | GI_28373095-S | Chr12tp-1H8  | 22333762  | 22472221  | 12 | 87977    | 226436  | 14.7398 | 0.6675 | 6.4653 | 5.15  | 3.7744 | 2.992 | YRI |
| SIGLEC5 | GI_4502658-S  | Chr19tp-7A10 | 56783548  | 56958512  | 19 | -23686   | 151278  | 5.3744  | 0.3094 | 5.4547 | 4.494 | 3.3275 | 2.641 | YRI |
| SLC2A13 | GI_16418394-S | Chr12tp-19E9 | 38449595  | 38641367  | 12 | 10398    | 202170  | 5.1673  | 0.2932 | 5.8112 | 4.465 | 3.5723 | 2.841 | YRI |
| SUHW2   | GI_38202248-S | Chr22tp-6B8  | 20693407  | 20733158  | 22 | -470451  | -430700 | 6.103   | 0.3343 | 8.8075 | 6.009 | 4.3078 | 2.841 | YRI |
| TCEB3   | GI_4507388-S  | Chr1tp-26D1  | 24514712  | 24618461  | 1  | 683167   | 786916  | 5.0591  | 0.2787 | 6.1699 | 4.835 | 3.6751 | 2.889 | YRI |
| UBAP2   | GI_22325365-A | Chr9tp-5D9   | 34758158  | 34919696  | 9  | 846421   | 1007959 | 4.3566  | 0.239  | 5.4601 | 4.335 | 3.4624 | 2.776 | YRI |
| UGT2B10 | GI_27552756-S | Chr4tp-23H10 | 69126468  | 69296476  | 4  | -750788  | -580780 | 4.7695  | 0.2665 | 5.5891 | 4.577 | 3.4286 | 2.746 | YRI |
| UGT2B11 | GI_4507822-S  | Chr4tp-23H10 | 69126468  | 69296476  | 4  | -1120655 | -950647 | 11.4101 | 0.566  | 6.2463 | 4.833 | 3.6682 | 2.888 | YRI |
| UGT2B17 | GI_4507820-S  | Chr4tp-23H10 | 69126468  | 69296476  | 4  | -105361  | 64647   | 10.4865 | 0.5329 | 6.6359 | 5.408 | 3.791  | 2.985 | YRI |
| UGT2B7  | GI_4507824-S  | Chr4tp-23H10 | 69126468  | 69296476  | 4  | -1032588 | -862580 | 11.0417 | 0.5531 | 5.8227 | 4.708 | 3.7028 | 2.913 | YRI |

Table S4: Most significant associations of CNV-clones with gene expression at 0.001

| Gene_label  | Illumina Gene_ID | clone_Label  | chromosome | Distance probe to CNV_start | Distance probe to CNV_end | -log10(p-value) | Adjusted_R^2 | slope    | pos/neg slope | population | clone_midpoint B35 | probe_midpoint B35 | distance clone midpoint-probe midpoint | CNV_ID   | CNV_class    | CNV Frequency in 270 HapMap individuals | CNV_start B35 | CNV_end B35 | probe in CNV? | Distance from probe to CNV |
|-------------|------------------|--------------|------------|-----------------------------|---------------------------|-----------------|--------------|----------|---------------|------------|--------------------|--------------------|----------------------------------------|----------|--------------|-----------------------------------------|---------------|-------------|---------------|----------------------------|
| AP2S1       | GI_11038644-I    | Chr19tp-3A4  | 19         | 514966                      | 682687                    | 3.5605          | 0.2046       | -1.6672  | -             | CEU        | 52633457           | 52033313           | 600144                                 | Chr19_9  | del          | 3                                       | 52549596      | 52717317    | out           | 516283                     |
| ARL8        | GI_31341468-S    | Chr10tp-1H10 | 10         | 1775769                     | 1931816                   | 3.2798          | 0.1804       | -0.8988  | -             | CEU        | 20860591           | 19006798           | 1853793                                | Chr10_6  | del          | 54                                      | 20726725      | 20938614    | out           | 1719927                    |
| CGI-96      | GI_25092724-S    | Chr22tp-8C6  | 22         | -7936                       | 93355                     | 4.2056          | 0.2338       | 2.277    | +             | CEU        | 41275994           | 41233284           | 42710                                  | Chr22_26 | dup          | 25                                      | 41091699      | 41407804    | inside        | 0                          |
| CHL1        | GI_27894375-S    | Chr3tp-4B4   | 3          | -90713                      | 93983                     | 6.1255          | 0.3451       | 5.6742   | +             | CEU        | 425974             | 424339             | 1635                                   | Chr3_25  | complex      | 3                                       | 46156         | 773503      | inside        | 0                          |
| CTNNA2      | GI_7656998-S     | Chr2tp-3G4   | 2          | -212771                     | -33218                    | 7.1119          | 0.3949       | 9.949    | +             | CEU        | 80664343           | 80787337           | 122995                                 | Chr2_10  | del          | 2                                       | 80312976      | 80754119    | out           | 33218                      |
| DKFZp434O02 | GI_32698823-S    | Chr22tp-8G4  | 22         | -95275                      | 73303                     | 6.9669          | 0.3772       | 1.8491   | +             | CEU        | 24061103           | 24072089           | 10986                                  | Chr22_24 | del/dup      | 27                                      | 23691355      | 24281461    | inside        | 0                          |
| EGLN3       | GI_31742485-S    | Chr14tp-2D11 | 14         | -1535518                    | -1377596                  | 3.585           | 0.2209       | -5.498   | -             | CEU        | 32007212           | 33463749           | 1456537                                | Chr14_6  | dup          | 4                                       | 31928231      | 32086193    | out           | 1377556                    |
| FLJ22795    | GI_13443001-S    | Chr15tp-4E11 | 15         | 148042                      | 334921                    | 4.2608          | 0.2334       | 0.8684   | +             | CEU        | 81014141           | 80772659           | 241482                                 | Chr15_2  | del/dup      | 32                                      | 80676701      | 81107580    | inside        | 0                          |
| FLJ43692    | GI_38348301-S    | Chr7tp-5B10  | 7          | 92344                       | 158953                    | 5.7529          | 0.3206       | 0.8584   | +             | CEU        | 143446262          | 143320613          | 125649                                 | Chr7_29  | multiallelic | 151                                     | 142664612     | 143806286   | inside        | 0                          |
| GBP3        | GI_24308156-S    | Chr1tp-29F3  | 1          | -61102                      | 3882                      | 5.9266          | 0.3298       | 5.6887   | +             | CEU        | 89156581           | 89185191           | 28610                                  | Chr1_31  | complex      | 27                                      | 89124089      | 89272744    | inside        | 0                          |
| GRLF1       | GI_25121939-A    | Chr19tp-3A4  | 19         | 353163                      | 520884                    | 3.2638          | 0.1854       | -2.3938  | -             | CEU        | 52633457           | 52196433           | 437024                                 | Chr19_9  | del          | 3                                       | 52549596      | 52717317    | out           | 353163                     |
| HLA-DQA1    | GI_18426974-S    | Chr6tp-5C11  | 6          | -215437                     | -124891                   | 8.5936          | 0.457        | -10.1863 | -             | CEU        | 32548671           | 32718835           | 170164                                 | Chr6_19  | dup          | 205                                     | 32479731      | 32813412    | inside        | 0                          |
| HLA-DQA2    | GI_11095446-S    | Chr6tp-5C11  | 6          | -317635                     | -227089                   | 8.0767          | 0.4343       | 6.0867   | +             | CEU        | 32548671           | 32821033           | 272362                                 | Chr6_19  | dup          | 205                                     | 32479731      | 32813412    | out           | 7621                       |
| hmm19553    | hmm19553-S       | Chr10tp-18B5 | 10         | 490276                      | 697781                    | 4.4472          | 0.2479       | -0.3448  | -             | CEU        | 45529369           | 44935340           | 594029                                 | Chr10_30 | del/dup      | 2                                       | 45341719      | 47972148    | out           | 406379                     |
| hmm26489    | hmm26489-S       | Chr1tp-25A7  | 1          | -29543                      | 81064                     | 4.1963          | 0.2297       | 1.8841   | +             | CEU        | 1707122            | 1681361            | 25761                                  | Chr1_10  | del/dup      | 19                                      | 1651818       | 1762425     | inside        | 0                          |
| hmm34479    | hmm34479-S       | Chr8tp-3H5   | 8          | -456194                     | -344557                   | 4.6969          | 0.2584       | 0.8407   | +             | CEU        | 2256571            | 2656946            | 400376                                 | Chr8_24  | del/dup      | 3                                       | 2105020       | 2411266     | out           | 245680                     |
| Hs.150050   | Hs.150050-S      | Chr22tp-8G4  | 22         | -264495                     | -95917                    | 4.9706          | 0.2738       | 0.6043   | +             | CEU        | 24061103           | 24241309           | 180206                                 | Chr22_24 | del/dup      | 27                                      | 23691355      | 24281461    | inside        | 0                          |
| Hs.463184   | Hs.463184-S      | Chr17tp-12C1 | 17         | -18185                      | 175877                    | 6.0349          | 0.3355       | 1.1365   | +             | CEU        | 41074763           | 40995917           | 78846                                  | Chr17_17 | dup          | 2                                       | 40977732      | 41171794    | inside        | 0                          |
| Hs.525661   | Hs.525661-S      | Chr15tp-7C8  | 15         | 801991                      | 967217                    | 4.7152          | 0.2634       | 0.2536   | +             | CEU        | 20014944           | 19130340           | 884604                                 | Chr15_8  | complex      | 129                                     | 18263733      | 21066294    | inside        | 0                          |
| LOC196394   | GI_37543779-S    | Chr12tp-7F5  | 12         | -699189                     | -528324                   | 3.6695          | 0.2016       | 2.2924   | +             | CEU        | 31102167           | 31715923           | 613757                                 | Chr12_16 | del/dup      | 10                                      | 31016734      | 31382371    | out           | 333552                     |
| LOC255812   | GI_37550242-S    | Chr3tp-18B6  | 3          | 1881232                     | 1932759                   | 4.9148          | 0.2832       | 0.7938   | +             | CEU        | 198797824          | 196890828          | 1906996                                | Chr3_1   | del          | 1                                       | 198772060     | 198823587   | out           | 1881232                    |
| LOC345754   | GI_37550208-S    | Chr5tp-2D2   | 5          | -109545                     | 42089                     | 4.2624          | 0.2335       | 0.9662   | +             | CEU        | 21497307           | 21531035           | 33728                                  | Chr5_4   | complex      | 50                                      | 21184910      | 21748947    | inside        | 0                          |
| LOC347981   | GI_30160064-S    | Chr6tp-22E5  | 6          | 16532                       | 37753                     | 6.0065          | 0.3772       | 2.2144   | +             | CEU        | 29989686           | 29962543           | 27143                                  | Chr6_22  | complex      | 21                                      | 29900413      | 30083123    | inside        | 0                          |
| LOC374673   | GI_37541248-S    | Chr15tp-4E11 | 15         | 398146                      | 585025                    | 4.4622          | 0.2451       | 1.2832   | +             | CEU        | 81014141           | 80522555           | 491586                                 | Chr15_2  | del/dup      | 32                                      | 80676701      | 81107580    | out           | 154146                     |
| LOC388077   | GI_41150141-S    | Chr15tp-7C8  | 15         | -17353                      | 147873                    | 5.6011          | 0.3125       | 1.3639   | +             | CEU        | 20014944           | 19949684           | 65260                                  | Chr15_8  | complex      | 129                                     | 18263733      | 21066294    | inside        | 0                          |
| LOC400543   | GI_42660801-S    | Chr16tp-12F7 | 16         | -994209                     | -843066                   | 4.1915          | 0.2404       | 1.5906   | +             | CEU        | 21483635           | 22402272           | 918638                                 | Chr16_11 | del/dup      | 70                                      | 21241957      | 21833734    | out           | 568538                     |
| MGC10204    | GI_34222200-S    | Chr19tp-6H5  | 19         | 564783                      | 680757                    | 3.3479          | 0.1817       | -0.3942  | -             | CEU        | 55286809           | 54664039           | 622770                                 | Chr19_3  | complex      | 136                                     | 55228822      | 55344796    | out           | 564783                     |



|           |               |              |    |          |          |         |        |         |   |     |           |           |         |          |              |     |           |           |        |         |
|-----------|---------------|--------------|----|----------|----------|---------|--------|---------|---|-----|-----------|-----------|---------|----------|--------------|-----|-----------|-----------|--------|---------|
| MGC41943  | GI_34222265-S | Chr7tp-5B10  | 7  | 624842   | 691451   | 8.2551  | 0.4422 | 0.6558  | + | CEU | 143446262 | 142788115 | 658147  | Chr7_29  | multiallelic | 151 | 142664612 | 143806286 | inside | 0       |
| MRPS26    | GI_39812071-S | Chr20tp-4A10 | 20 | -1551652 | -1436175 | 3.8084  | 0.2134 | 0.9804  | + | CEU | 1482520   | 2976433   | 1493914 | Chr20_5  | dup          | 78  | 1424781   | 1627256   | out    | 1349177 |
| NOL5A     | GI_32483373-S | Chr20tp-4A10 | 20 | -1162200 | -1046723 | 3.3275  | 0.1834 | 1.4409  | + | CEU | 1482520   | 2586981   | 1104462 | Chr20_5  | dup          | 78  | 1424781   | 1627256   | out    | 959725  |
| PDPR      | GI_32261325-S | Chr16tp-9C8  | 16 | -62302   | 118293   | 9.1346  | 0.4798 | 2.0465  | + | CEU | 68780426  | 68752430  | 27996   | Chr16_21 | complex      | 19  | 68412623  | 68870723  | inside | 0       |
| PPP5C     | GI_20127496-S | Chr19tp-3A4  | 19 | 963821   | 1131542  | 3.38    | 0.193  | -1.5748 | - | CEU | 52633457  | 51585775  | 1047682 | Chr19_9  | del          | 3   | 52549596  | 52717317  | out    | 963821  |
| SIGLEC5   | GI_4502658-S  | Chr19tp-7A10 | 19 | -23686   | 151278   | 4.692   | 0.2703 | -1.0019 | - | CEU | 56871030  | 56807234  | 63796   | Chr19_11 | del          | 15  | 56683708  | 56958512  | inside | 0       |
| SMN2      | GI_13259530-A | Chr5tp-3F4   | 5  | 825985   | 1016855  | 5.6857  | 0.3125 | 3.0261  | + | CEU | 70330033  | 69408613  | 921420  | Chr5_29  | multiallelic | 37  | 70072978  | 70425468  | out    | 664365  |
| TMEPAI    | GI_40317614-A | Chr20tp-6F1  | 20 | -52910   | 84183    | 3.7237  | 0.2049 | 2.9585  | + | CEU | 55672731  | 55657094  | 15637   | Chr20_18 | del          | 35  | 55604184  | 56121677  | inside | 0       |
| TOM1L1    | GI_4885638-S  | Chr17tp-7C4  | 17 | -1966752 | -1836886 | 3.8046  | 0.2238 | -3.4675 | - | CEU | 48480141  | 50381960  | 1901819 | Chr17_23 | del          | 2   | 48369345  | 48627779  | out    | 1754181 |
| UGT2B10   | GI_27552756-S | Chr4tp-1F2   | 4  | -802255  | -646609  | 5.2344  | 0.311  | 5.9275  | + | CEU | 69152824  | 69877256  | 724432  | Chr4_9   | dup          | 54  | 68998845  | 69296476  | out    | 580780  |
| UGT2B11   | GI_4507822-S  | Chr4tp-23H10 | 4  | -1120655 | -950647  | 14.7246 | 0.6671 | 5.3223  | + | CEU | 69211472  | 70247123  | 1035651 | Chr4_9   | dup          | 102 | 68998845  | 69296476  | out    | 950647  |
| UGT2B17   | GI_4507820-S  | Chr4tp-23H10 | 4  | -105361  | 64647    | 15.0078 | 0.6746 | 6.3701  | + | CEU | 69211472  | 69231829  | 20357   | Chr4_9   | dup          | 102 | 68998845  | 69296476  | inside | 0       |
| UGT2B7    | GI_4507824-S  | Chr4tp-23H10 | 4  | -1032588 | -862580  | 13.9271 | 0.6451 | 4.7694  | + | CEU | 69211472  | 70159056  | 947584  | Chr4_9   | dup          | 102 | 68998845  | 69296476  | out    | 862580  |
| BIRC1     | GI_4758751-S  | Chr5tp-3A5   | 5  | 60291    | 224986   | 5.3367  | 0.3755 | 0.5983  | + | CHB | 69567951  | 69425312  | 142639  | Chr5_61  | complex      | 142 | 69109876  | 70831640  | inside | 0       |
| CGI-96    | GI_25092724-S | Chr22tp-8C6  | 22 | -7936    | 93355    | 5.2361  | 0.3759 | 1.8544  | + | CHB | 41275994  | 41233284  | 42710   | Chr22_26 | dup          | 25  | 41091699  | 41407804  | inside | 0       |
| CHL1      | GI_27894375-S | Chr3tp-4B4   | 3  | -90713   | 93983    | 4.2427  | 0.3068 | 4.6578  | + | CHB | 425974    | 424339    | 1635    | Chr3_25  | complex      | 3   | 46156     | 773503    | inside | 0       |
| GBP3      | GI_24308156-S | Chr1tp-35B1  | 1  | 1883     | 87553    | 4.2589  | 0.3276 | 5.6114  | + | CHB | 89229909  | 89185191  | 44718   | Chr1_31  | complex      | 27  | 89124089  | 89272744  | inside | 0       |
| HLA-DQA2  | GI_11095446-S | Chr6tp-5C11  | 6  | -317635  | -227089  | 11.5728 | 0.6759 | 7.6617  | + | CHB | 32548671  | 32821033  | 272362  | Chr6_19  | dup          | 205 | 32479731  | 32813412  | out    | 7621    |
| HLA-DRB5  | GI_26665892-S | Chr6tp-5C11  | 6  | -89827   | 719      | 7.4891  | 0.5011 | 7.9969  | + | CHB | 32548671  | 32593225  | 44554   | Chr6_19  | dup          | 205 | 32479731  | 32813412  | inside | 0       |
| Hs.460059 | Hs.460059-S   | Chr16tp-9F3  | 16 | -67323   | 114166   | 4.134   | 0.2989 | 0.8413  | + | CHB | 14880002  | 14856580  | 23422   | Chr16_6  | del/dup      | 19  | 14529556  | 15133811  | inside | 0       |
| Hs.490862 | Hs.490862-S   | Chr8tp-13F3  | 8  | 1620253  | 1796445  | 4.0778  | 0.3071 | 0.9122  | + | CHB | 3843330   | 2134981   | 1708349 | Chr8_47  | dup          | 3   | 3586932   | 5909600   | out    | 1451951 |
| KIAA0220  | GI_42660956-S | Chr16tp-8B1  | 16 | 48560    | 224778   | 7.1145  | 0.4977 | 1.0834  | + | CHB | 22591701  | 22455032  | 136669  | Chr16_20 | del/dup      | 162 | 22201625  | 22679810  | inside | 0       |
| LOC283820 | GI_27734708-S | Chr16tp-6D2  | 16 | 1812140  | 1997169  | 4.9039  | 0.3604 | 1.6957  | + | CHB | 18200678  | 16296023  | 1904655 | Chr16_18 | del/dup      | 17  | 18036757  | 19066807  | out    | 1740734 |
| LOC339088 | GI_37541953-S | Chr16tp-3A9  | 16 | 736563   | 917563   | 4.9573  | 0.3572 | 1.1873  | + | CHB | 30200281  | 29373218  | 827063  | Chr16_30 | dup          | 12  | 29981456  | 30290781  | out    | 608238  |
| LOC374673 | GI_37541248-S | Chr15tp-2D4  | 15 | 215922   | 364619   | 3.9765  | 0.2932 | 1.2506  | + | CHB | 80812826  | 80522555  | 290271  | Chr15_2  | del/dup      | 40  | 80676701  | 81107580  | out    | 154146  |
| LOC375133 | GI_40786533-S | Chr22tp-7B3  | 22 | -1399415 | -1355688 | 4.4607  | 0.329  | 1.1848  | + | CHB | 17385215  | 18762766  | 1377552 | Chr22_17 | complex      | 48  | 17363351  | 17436267  | out    | 1326499 |
| LOC378157 | GI_37539180-S | Chr7tp-13D1  | 7  | -71619   | 32633    | 4.3686  | 0.3223 | 3.4743  | + | CHB | 43777905  | 43797398  | 19493   | Chr7_2   | dup          | 52  | 43725779  | 43830031  | inside | 0       |
| LOC388077 | GI_41150141-S | Chr15tp-7C8  | 15 | -17353   | 147873   | 6.8608  | 0.4672 | 1.4305  | + | CHB | 20014944  | 19949684  | 65260   | Chr15_8  | complex      | 129 | 18263733  | 21066294  | inside | 0       |
| LOC388440 | GI_42661316-S | Chr17tp-11A1 | 17 | -145880  | 11455    | 5.2236  | 0.3681 | 3.467   | + | CHB | 31388066  | 31455278  | 67213   | Chr17_14 | complex      | 126 | 31309398  | 31981395  | inside | 0       |
| LOC400543 | GI_42660801-S | Chr16tp-8B1  | 16 | 101320   | 277538   | 7.0287  | 0.4929 | 0.9031  | + | CHB | 22591701  | 22402272  | 189429  | Chr16_20 | del/dup      | 162 | 22201625  | 22679810  | inside | 0       |
| MGC12760  | GI_34147433-S | Chr1tp-25H8  | 1  | -52396   | 93744    | 8.0881  | 0.5488 | 2.2552  | + | CHB | 16710992  | 16690318  | 20674   | Chr1_15  | del/dup      | 60  | 16509639  | 17229287  | inside | 0       |
| MGC21881  | GI_44888813-S | Chr9tp-3D7   | 9  | 648676   | 836181   | 3.8841  | 0.2803 | 1.0448  | + | CHB | 64979103  | 64236674  | 742429  | Chr9_16  | del/dup      | 27  | 64135929  | 68383081  | inside | 0       |
| MGC41943  | GI_34222265-S | Chr7tp-7H4   | 7  | 495012   | 625041   | 4.7936  | 0.3459 | 0.5695  | + | CHB | 143348142 | 142788115 | 560027  | Chr7_29  | multiallelic | 150 | 142664612 | 143806286 | inside | 0       |
| MGC5178   | GI_30089944-A | Chr16tp-9D2  | 16 | -128220  | 72591    | 4.5664  | 0.3301 | 3.4539  | + | CHB | 29349118  | 29374681  | 25564   | Chr16_41 | dup          | 13  | 29181449  | 29609853  | inside | 0       |
| NPIP      | GI_5902013-S  | Chr16tp-9F3  | 16 | 61772    | 243261   | 5.4541  | 0.3902 | 1.1639  | + | CHB | 14880002  | 14727485  | 152517  | Chr16_6  | del/dup      | 19  | 14529556  | 15133811  | inside | 0       |
| PDPR      | GI_32261325-S | Chr16tp-9C8  | 16 | -62302   | 118293   | 11.4405 | 0.6888 | 2.4144  | + | CHB | 68780426  | 68752430  | 27996   | Chr16_21 | complex      | 19  | 68412623  | 68870723  | inside | 0       |
| PM5       | GI_10947030-S | Chr16tp-9F3  | 16 | -108109  | 73380    | 5.6759  | 0.4044 | 1.6182  | + | CHB | 14880002  | 14897366  | 17365   | Chr16_6  | del/dup      | 19  | 14529556  | 15133811  | inside | 0       |
| SMA4      | GI_41281598-S | Chr5tp-2H6   | 5  | 1101273  | 1225599  | 4.074   | 0.2945 | 0.595   | + | CHB | 70135141  | 68971705  | 1163436 | Chr5_29  | multiallelic | 2   | 70072978  | 70425468  | out    | 1101273 |
| SMN1      | GI_13259511-A | Chr5tp-2H6   | 5  | 663882   | 788208   | 7.9531  | 0.5333 | 1.5541  | + | CHB | 70135141  | 69409096  | 726045  | Chr5_29  | multiallelic | 2   | 70072978  | 70425468  | out    | 663882  |
| SMN2      | GI_13259530-A | Chr5tp-2H6   | 5  | 664365   | 788691   | 9.3678  | 0.5994 | 3.0755  | + | CHB | 70135141  | 69408613  | 726528  | Chr5_29  | multiallelic | 2   | 70072978  | 70425468  | out    | 664365  |

|             |               |             |    |          |          |         |        |         |   |     |          |          |         |          |              |     |          |          |        |         |
|-------------|---------------|-------------|----|----------|----------|---------|--------|---------|---|-----|----------|----------|---------|----------|--------------|-----|----------|----------|--------|---------|
| SULT1A3     | GI_29550920-A | Chr16p-3A9  | 16 | 726249   | 907249   | 5.6374  | 0.4019 | 2.7247  | + | CHB | 30200281 | 29383532 | 816749  | Chr16_30 | dup          | 12  | 29981456 | 30290781 | out    | 597924  |
| UGT2B10     | GI_27552756-S | Chr4p-23H10 | 4  | -750788  | -580780  | 7.5642  | 0.5308 | 2.1606  | + | CHB | 69211472 | 69877256 | 665784  | Chr4_9   | dup          | 102 | 68998845 | 69296476 | out    | 580780  |
| UGT2B11     | GI_4507822-S  | Chr4p-23H10 | 4  | -1120655 | -950647  | 14.9269 | 0.7971 | 7.2275  | + | CHB | 69211472 | 70247123 | 1035651 | Chr4_9   | dup          | 102 | 68998845 | 69296476 | out    | 950647  |
| UGT2B17     | GI_4507820-S  | Chr4p-23H10 | 4  | -105361  | 64647    | 15.7922 | 0.8163 | 8.4857  | + | CHB | 69211472 | 69231829 | 20357   | Chr4_9   | dup          | 102 | 68998845 | 69296476 | inside | 0       |
| UGT2B7      | GI_4507824-S  | Chr4p-23H10 | 4  | -1032588 | -862580  | 14.1214 | 0.7776 | 6.592   | + | CHB | 69211472 | 70159056 | 947584  | Chr4_9   | dup          | 102 | 68998845 | 69296476 | out    | 862580  |
| C19orf6     | GI_34098936-S | Chr19p-6D4  | 19 | 369986   | 534795   | 3.4487  | 0.2694 | 1.1283  | + | JPT | 1413529  | 961138   | 452391  | Chr19_6  | del          | 1   | 1331124  | 1495933  | out    | 369986  |
| CGI-96      | GI_25092724-S | Chr22p-8C6  | 22 | -7936    | 93355    | 6.1055  | 0.4234 | 1.5548  | + | JPT | 41275994 | 41233284 | 42710   | Chr22_26 | dup          | 25  | 41091699 | 41407804 | inside | 0       |
| DKFZP572C16 | GI_42822888-S | Chr9p-2A1   | 9  | -1021083 | -932258  | 5.7335  | 0.4007 | 1.0346  | + | JPT | 41238428 | 42215098 | 976671  | Chr9_3   | complex      | 79  | 38557168 | 44769175 | inside | 0       |
| DKFZp762C18 | GI_22062495-S | Chr11p-2F4  | 11 | 199812   | 362282   | 3.2931  | 0.2299 | 4.2008  | + | JPT | 65397704 | 65116657 | 281047  | Chr11_16 | dup          | 2   | 65316469 | 65478939 | out    | 199812  |
| EIF3S8      | GI_5579457-S  | Chr16p-11B1 | 16 | -63171   | 97279    | 4.1549  | 0.2945 | 2.7349  | + | JPT | 28671174 | 28654120 | 17054   | Chr16_13 | del          | 3   | 28590949 | 28751472 | inside | 0       |
| FLJ00058    | GI_32698768-S | Chr19p-6D4  | 19 | -1131251 | -966442  | 3.6805  | 0.2886 | 1.9588  | + | JPT | 1413529  | 2462375  | 1048847 | Chr19_6  | del          | 1   | 1331124  | 1495933  | out    | 966442  |
| FLJ20360    | GI_37620164-S | Chr10p-7D2  | 10 | -168080  | -405     | 2.9484  | 0.2116 | 3.8222  | + | JPT | 5760949  | 5845191  | 84243   | Chr10_18 | dup          | 2   | 5677111  | 5844786  | out    | 405     |
| GBP3        | GI_24308156-S | Chr11p-29F3 | 1  | -61102   | 3882     | 6.474   | 0.4452 | 5.6194  | + | JPT | 89156581 | 89185191 | 28610   | Chr1_31  | complex      | 27  | 89124089 | 89272744 | inside | 0       |
| GTF2H2      | GI_31747573-S | Chr5p-13C10 | 5  | 634996   | 793009   | 4.601   | 0.3261 | 1.1155  | + | JPT | 69631862 | 68917859 | 714003  | Chr5_61  | complex      | 130 | 69109876 | 70831640 | out    | 192017  |
| HDAC5       | GI_21237796-A | Chr17p-5C2  | 17 | 1928218  | 2054448  | 3.4697  | 0.2486 | -3.7205 | - | JPT | 41502866 | 39511533 | 1991333 | Chr17_12 | multiallelic | 33  | 41439751 | 42632332 | out    | 1928218 |
| HLA-DQA2    | GI_11095446-S | Chr6p-5C11  | 6  | -317635  | -227089  | 9.1094  | 0.5794 | 6.1418  | + | JPT | 32548671 | 32821033 | 272362  | Chr6_19  | dup          | 205 | 32479731 | 32813412 | out    | 7621    |
| HLA-DRB5    | GI_26665892-S | Chr6p-5C11  | 6  | -89827   | 719      | 5.6106  | 0.393  | 5.7606  | + | JPT | 32548671 | 32593225 | 44554   | Chr6_19  | dup          | 205 | 32479731 | 32813412 | inside | 0       |
| hmm27235    | hmm27235-S    | Chr22p-7B3  | 22 | 1096475  | 1140202  | 4.4093  | 0.3189 | -0.4264 | - | JPT | 17385215 | 16266876 | 1118339 | Chr22_17 | complex      | 48  | 17363351 | 17436267 | out    | 1096475 |
| Hs.460059   | Hs.460059-S   | Chr16p-2E3  | 16 | 1795976  | 1974709  | 5.8012  | 0.4049 | 0.8569  | + | JPT | 16741923 | 14856580 | 1885343 | Chr16_34 | del/dup      | 21  | 16092718 | 16831289 | out    | 1236138 |
| KIAA0220    | GI_42660956-S | Chr16p-12F7 | 16 | -1046969 | -895826  | 6.5711  | 0.4587 | 2.387   | + | JPT | 21483635 | 22455032 | 971398  | Chr16_11 | del/dup      | 70  | 21241957 | 21833734 | out    | 621298  |
| LOC283820   | GI_27734708-S | Chr16p-6G1  | 16 | 1812140  | 1997169  | 5.8283  | 0.4065 | 1.891   | + | JPT | 18200678 | 16296023 | 1904655 | Chr16_18 | del/dup      | 10  | 18036757 | 19066807 | out    | 1740734 |
| LOC286088   | GI_37552472-S | Chr8p-3B9   | 8  | -1416943 | -1255784 | 4.1142  | 0.2916 | -3.7425 | - | JPT | 384740   | 1721103  | 1336364 | Chr8_27  | dup          | 3   | 59932    | 484890   | out    | 1236213 |
| LOC375249   | GI_37547210-S | Chr2p-12B8  | 2  | -117350  | 73704    | 3.7456  | 0.2698 | 6.1814  | + | JPT | 97208441 | 97230264 | 21823   | Chr2_48  | del          | 7   | 96992983 | 97492237 | inside | 0       |
| LOC378157   | GI_37539180-S | Chr7p-13D1  | 7  | -71619   | 32633    | 10.0615 | 0.6196 | 3.4778  | + | JPT | 43777905 | 43797398 | 19493   | Chr7_2   | dup          | 52  | 43725779 | 43830031 | inside | 0       |
| LOC388077   | GI_41150141-S | Chr15p-7C8  | 15 | -17353   | 147873   | 8.1058  | 0.5324 | 1.3723  | + | JPT | 20014944 | 19949684 | 65260   | Chr15_8  | complex      | 129 | 18263733 | 21066294 | inside | 0       |
| LOC400543   | GI_42660801-S | Chr16p-8B1  | 16 | 101320   | 277538   | 4.2276  | 0.2997 | 0.7196  | + | JPT | 22591701 | 22402272 | 189429  | Chr16_20 | del/dup      | 162 | 22201625 | 22679810 | inside | 0       |
| LOC402488   | GI_42658295-S | Chr7p-13D1  | 7  | -73281   | 30971    | 7.8345  | 0.5189 | 2.2701  | + | JPT | 43777905 | 43799060 | 21155   | Chr7_2   | dup          | 52  | 43725779 | 43830031 | inside | 0       |
| LPHN3       | GI_14149676-S | Chr4p-17H8  | 4  | -1143011 | -969700  | 3.3296  | 0.2427 | -0.5935 | - | JPT | 61710267 | 62766622 | 1056356 | Chr4_27  | dup          | 7   | 61623611 | 61796922 | out    | 969700  |
| MGC12760    | GI_34147433-S | Chr1p-25H9  | 1  | 62580    | 180646   | 6.958   | 0.4726 | 1.2497  | + | JPT | 16811931 | 16690318 | 121613  | Chr1_15  | del/dup      | 93  | 16509639 | 17229287 | inside | 0       |
| MGC16824    | GI_31543158-S | Chr16p-12A1 | 16 | 1889590  | 2055794  | 3.9098  | 0.2766 | -0.4427 | - | JPT | 21592230 | 19619538 | 1972692 | Chr16_11 | del/dup      | 74  | 21241957 | 21833734 | out    | 1622419 |
| MGC3130     | GI_31543178-S | Chr17p-5C2  | 17 | 1844433  | 1970663  | 3.2367  | 0.2302 | -4.1774 | - | JPT | 41502866 | 39595318 | 1907548 | Chr17_12 | multiallelic | 33  | 41439751 | 42632332 | out    | 1844433 |
| MGC42630    | GI_31341689-S | Chr9p-13D1  | 9  | -1547928 | -1270095 | 6.2612  | 0.4327 | 0.5567  | + | JPT | 42789454 | 44198465 | 1409012 | Chr9_3   | complex      | 1   | 38557168 | 44769175 | inside | 0       |
| MGC5356     | GI_15011885-S | Chr20p-6G1  | 20 | 538477   | 718364   | 3.9929  | 0.2885 | -0.6717 | - | JPT | 62286696 | 61658275 | 628421  | Chr20_14 | complex      | 5   | 62108666 | 62435964 | out    | 450391  |
| MTVR1       | GI_22779872-S | Chr11p-2F4  | 11 | 218425   | 380895   | 4.3057  | 0.3053 | 4.1412  | + | JPT | 65397704 | 65098044 | 299660  | Chr11_16 | dup          | 2   | 65316469 | 65478939 | out    | 218425  |
| OAZ1        | GI_34486089-S | Chr19p-6D4  | 19 | -893061  | -728252  | 3.5177  | 0.2752 | 0.9102  | + | JPT | 1413529  | 2224185  | 810657  | Chr19_6  | del          | 1   | 1331124  | 1495933  | out    | 728252  |
| OTUB1       | GI_8923113-S  | Chr11p-2F4  | 11 | 1794138  | 1956608  | 3.1233  | 0.2166 | 3.3809  | + | JPT | 65397704 | 63522331 | 1875373 | Chr11_16 | dup          | 2   | 65316469 | 65478939 | out    | 1794138 |
| PDPR        | GI_32261325-S | Chr16p-9C8  | 16 | -62302   | 118293   | 4.2263  | 0.2997 | 1.6147  | + | JPT | 68780426 | 68752430 | 27996   | Chr16_21 | complex      | 19  | 68412623 | 68870723 | inside | 0       |
| PM5         | GI_10947030-S | Chr16p-2E3  | 16 | 1755190  | 1933923  | 5.8061  | 0.4052 | 1.1397  | + | JPT | 16741923 | 14897366 | 1844557 | Chr16_34 | del/dup      | 21  | 16092718 | 16831289 | out    | 1195352 |
| SMN1        | GI_13259511-A | Chr5p-2H6   | 5  | 663882   | 788208   | 5.3414  | 0.3758 | 1.0272  | + | JPT | 70135141 | 69409096 | 726045  | Chr5_29  | multiallelic | 2   | 70072978 | 70425468 | out    | 663882  |
| SMN2        | GI_13259530-A | Chr5p-2H6   | 5  | 664365   | 788691   | 6.9629  | 0.4728 | 2.3194  | + | JPT | 70135141 | 69408613 | 726528  | Chr5_29  | multiallelic | 2   | 70072978 | 70425468 | out    | 664365  |

|             |               |              |    |          |          |         |        |          |   |     |           |           |         |          |              |     |           |           |        |         |
|-------------|---------------|--------------|----|----------|----------|---------|--------|----------|---|-----|-----------|-----------|---------|----------|--------------|-----|-----------|-----------|--------|---------|
| UGT2B10     | GI_27552756-S | Chr4tp-23H10 | 4  | -750788  | -580780  | 14.2091 | 0.7632 | 1.7196   | + | JPT | 69211472  | 69877256  | 665784  | Chr4_9   | dup          | 102 | 68998845  | 69296476  | out    | 580780  |
| UGT2B11     | GI_4507822-S  | Chr4tp-23H10 | 4  | -1120655 | -950647  | 21.039  | 0.8876 | 7.2871   | + | JPT | 69211472  | 70247123  | 1035651 | Chr4_9   | dup          | 102 | 68998845  | 69296476  | out    | 950647  |
| UGT2B17     | GI_4507820-S  | Chr4tp-23H10 | 4  | -105361  | 64647    | 21.7175 | 0.8957 | 8.7412   | + | JPT | 69211472  | 69231829  | 20357   | Chr4_9   | dup          | 102 | 68998845  | 69296476  | inside | 0       |
| UGT2B7      | GI_4507824-S  | Chr4tp-23H10 | 4  | -1032588 | -862580  | 20.6757 | 0.8831 | 6.7305   | + | JPT | 69211472  | 70159056  | 947584  | Chr4_9   | dup          | 102 | 68998845  | 69296476  | out    | 862580  |
| ZNF558      | GI_21687263-S | Chr19tp-5H2  | 19 | -22902   | 51275    | 3.6131  | 0.2544 | -0.4341  | - | JPT | 8795759   | 8781572   | 14187   | Chr19_1  | complex      | 128 | 8758670   | 8832847   | inside | 0       |
| CGI-96      | GI_25092724-S | Chr22tp-8C6  | 22 | -7936    | 93355    | 7.9883  | 0.4303 | 2.1899   | + | YRI | 41275994  | 41233284  | 42710   | Chr22_26 | dup          | 25  | 41091699  | 41407804  | inside | 0       |
| DC6         | GI_34222364-S | Chr2tp-22A7  | 2  | 1096812  | 1259913  | 3.8511  | 0.2195 | 0.9066   | + | YRI | 129719533 | 128541170 | 1178363 | Chr2_66  | complex      | 50  | 129581854 | 129866275 | out    | 1040684 |
| DKFZp434N03 | GI_14149994-S | Chr22tp-7B3  | 22 | -2020023 | -1976296 | 6.6283  | 0.3658 | 1.9718   | + | YRI | 17385215  | 19383374  | 1998160 | Chr22_17 | complex      | 48  | 17363351  | 17436267  | out    | 1947107 |
| DKFZp434O02 | GI_32698823-S | Chr22tp-2A8  | 22 | -197718  | -95176   | 4.3913  | 0.241  | 3.3708   | + | YRI | 23925642  | 24072089  | 146447  | Chr22_24 | del/dup      | 22  | 23691355  | 24281461  | inside | 0       |
| FLJ43692    | GI_38348301-S | Chr7tp-7H4   | 7  | -37486   | 92543    | 5.6868  | 0.3171 | 0.5377   | + | YRI | 143348142 | 143320613 | 27529   | Chr7_29  | multiallelic | 150 | 142664612 | 143806286 | inside | 0       |
| FMO4        | GI_45037558-S | Chr1tp-31G2  | 1  | -1529056 | -1425876 | 3.5595  | 0.1918 | 0.7407   | + | YRI | 166565254 | 168042720 | 1477466 | Chr1_7   | complex      | 116 | 166513664 | 166616844 | out    | 1425876 |
| GGT1        | GI_4885270-A  | Chr22tp-6D1  | 22 | -688420  | -648338  | 3.6784  | 0.2087 | -7.6916  | - | YRI | 20646428  | 21314807  | 668379  | Chr22_21 | dup          | 2   | 20619657  | 20733158  | out    | 581649  |
| GTF2H2      | GI_31747573-S | Chr5tp-3H2   | 5  | 1753019  | 1913781  | 3.7977  | 0.2094 | 3.7004   | + | YRI | 70751259  | 68917859  | 1833400 | Chr5_61  | complex      | 34  | 69109876  | 70831640  | out    | 192017  |
| HLA-DQA1    | GI_18426974-S | Chr6tp-22E8  | 6  | 90584    | 94577    | 6.6771  | 0.4143 | 31.641   | + | YRI | 32811416  | 32718835  | 92581   | Chr6_19  | dup          | 58  | 32479731  | 32813412  | inside | 0       |
| HLA-DRB5    | GI_26665892-S | Chr6tp-4E2   | 6  | 41581    | 57379    | 10.8926 | 0.5415 | -9.8057  | - | YRI | 32642705  | 32593225  | 49480   | Chr6_4   | complex      | 6   | 32634806  | 32650604  | out    | 41581   |
| Hs.449564   | Hs.449564-S   | Chr22tp-6B8  | 22 | -11926   | 27825    | 6.4528  | 0.352  | -13.9622 | - | YRI | 20713283  | 20705333  | 7950    | Chr22_10 | del          | 5   | 20693407  | 20733158  | inside | 0       |
| Hs.462423   | Hs.462423-S   | Chr17tp-2C2  | 17 | -126434  | 31668    | 4.9199  | 0.271  | 0.7032   | + | YRI | 18942851  | 18990234  | 47383   | Chr17_32 | complex      | 96  | 18771341  | 19132640  | inside | 0       |
| Hs.487323   | Hs.487323-S   | Chr2tp-8F2   | 2  | -728390  | -412600  | 4.7445  | 0.2611 | 0.6291   | + | YRI | 131093675 | 131664170 | 570495  | Chr2_13  | complex      | 6   | 130291879 | 133031735 | inside | 0       |
| KIAA0738    | GI_7662275-S  | Chr7tp-1E4   | 7  | 13370    | 183092   | 4.1804  | 0.2287 | 0.3944   | + | YRI | 142920407 | 142822176 | 98231   | Chr7_29  | multiallelic | 103 | 142664612 | 143806286 | inside | 0       |
| LOC127069   | GI_17437031-S | Chr1tp-15A9  | 1  | -69065   | 108799   | 3.5733  | 0.1988 | 0.2765   | + | YRI | 245102483 | 245082616 | 19867   | Chr1_45  | del          | 58  | 244826150 | 245191415 | inside | 0       |
| LOC143034   | GI_18575382-S | Chr10tp-14D8 | 10 | -928439  | -764035  | 3.0752  | 0.162  | -1.5632  | - | YRI | 132203    | 978440    | 846237  | Chr10_15 | dup          | 2   | 50001     | 214405    | out    | 764035  |
| LOC255812   | GI_37550242-S | Chr3tp-18B6  | 3  | 1881232  | 1932759  | 7.1673  | 0.4089 | 0.9991   | + | YRI | 198797824 | 196890828 | 1906996 | Chr3_1   | del          | 1   | 198772060 | 198823587 | out    | 1881232 |
| LOC282956   | GI_27483210-S | Chr6tp-22C7  | 6  | -129990  | -9794    | 4.1698  | 0.2644 | 1.6168   | + | YRI | 31400659  | 31470551  | 69892   | Chr6_27  | del/dup      | 4   | 31338567  | 31605085  | inside | 0       |
| LOC347981   | GI_30160064-S | Chr6tp-22A4  | 6  | -62130   | 18531    | 6.4796  | 0.4036 | 2.4676   | + | YRI | 29940744  | 29962543  | 21800   | Chr6_22  | complex      | 21  | 29900413  | 30083123  | inside | 0       |
| LOC375133   | GI_40786533-S | Chr22tp-7B3  | 22 | -1399415 | -1355688 | 9.9142  | 0.5111 | 1.2384   | + | YRI | 17385215  | 18762766  | 1377552 | Chr22_17 | complex      | 48  | 17363351  | 17436267  | out    | 1326499 |
| LOC375790   | GI_37546731-S | Chr1tp-35F11 | 1  | -673561  | -519913  | 3.9638  | 0.2229 | 2.2767   | + | YRI | 434407    | 1031144   | 596737  | Chr1_32  | complex      | 49  | 377       | 852347    | out    | 178797  |
| LOC378157   | GI_37539180-S | Chr7tp-13D1  | 7  | -71619   | 32633    | 9.6845  | 0.5146 | 2.63     | + | YRI | 43777905  | 43797398  | 19493   | Chr7_2   | dup          | 52  | 43725779  | 43830031  | inside | 0       |
| LOC388077   | GI_41150141-S | Chr15tp-7C8  | 15 | -17353   | 147873   | 5.8149  | 0.3386 | 1.1993   | + | YRI | 20014944  | 19949684  | 65260   | Chr15_8  | complex      | 129 | 18263733  | 21066294  | inside | 0       |
| LOC388673   | GI_41115452-S | Chr1tp-31B7  | 1  | -1346096 | -1248478 | 5.5127  | 0.3078 | 0.8178   | + | YRI | 145092141 | 146389428 | 1297287 | Chr1_4   | complex      | 22  | 144800023 | 145140950 | out    | 1248478 |
| LOC401449   | GI_42658877-S | Chr12tp-4B7  | 12 | -75735   | 67053    | 3.7973  | 0.2093 | 0.5611   | + | YRI | 8239207   | 8243548   | 4341    | Chr12_4  | complex      | 23  | 7748086   | 8515254   | inside | 0       |
| LOC402488   | GI_42658295-S | Chr7tp-13D1  | 7  | -73281   | 30971    | 9.1073  | 0.491  | 2.2705   | + | YRI | 43777905  | 43799060  | 21155   | Chr7_2   | dup          | 52  | 43725779  | 43830031  | inside | 0       |
| MGC12760    | GI_34147433-S | Chr1tp-25H8  | 1  | -52396   | 93744    | 13.3699 | 0.6355 | 1.8406   | + | YRI | 16710992  | 16690318  | 20674   | Chr1_15  | del/dup      | 60  | 16509639  | 17229287  | inside | 0       |
| MGC5178     | GI_30089944-A | Chr16tp-3A9  | 16 | 732849   | 913849   | 4.2287  | 0.2316 | 2.0264   | + | YRI | 30200281  | 29374681  | 825600  | Chr16_30 | dup          | 12  | 29981456  | 30290781  | out    | 606775  |
| MGC71999    | GI_42476196-S | Chr17tp-11E5 | 17 | -1662645 | -1509032 | 3.723   | 0.2048 | -1.7982  | - | YRI | 55437138  | 57022976  | 1585839 | Chr17_8  | complex      | 31  | 55350429  | 55513944  | out    | 1509032 |
| PDPR        | GI_32261325-S | Chr16tp-9C8  | 16 | -62302   | 118293   | 14.5848 | 0.6765 | 1.8497   | + | YRI | 68780426  | 68752430  | 27996   | Chr16_21 | complex      | 19  | 68412623  | 68870723  | inside | 0       |
| SIGLEC5     | GI_4502658-S  | Chr19tp-7A10 | 19 | -23686   | 151278   | 5.3744  | 0.3094 | -0.8369  | - | YRI | 56871030  | 56807234  | 63796   | Chr19_11 | del          | 15  | 56683708  | 56958512  | inside | 0       |
| SLC20A1     | GI_31543629-S | Chr2tp-2E12  | 2  | -1223303 | -1017641 | 3.7532  | 0.2035 | 2.8865   | + | YRI | 112016760 | 113137232 | 1120472 | Chr2_28  | del/dup      | 13  | 111616014 | 112463168 | out    | 674064  |
| SMA4        | GI_41281598-S | Chr5tp-9E3   | 5  | 138171   | 292973   | 3.8824  | 0.2145 | 0.4489   | + | YRI | 69187277  | 68971705  | 215572  | Chr5_10  | dup          | 1   | 69109876  | 69264678  | out    | 138171  |
| SUHW2       | GI_38202248-S | Chr22tp-6B8  | 22 | -470451  | -430700  | 6.103   | 0.3343 | 2.58     | + | YRI | 20713283  | 21163858  | 450576  | Chr22_10 | del          | 5   | 20693407  | 20733158  | out    | 430700  |
| TBCD        | GI_41350332-S | Chr17tp-3H2  | 17 | -1752788 | -1560057 | 3.3925  | 0.1938 | -1.2951  | - | YRI | 76837392  | 78493814  | 1656423 | Chr17_16 | dup          | 8   | 76741026  | 76933757  | out    | 1560057 |

|         |               |              |    |          |          |         |        |           |     |          |          |         |          |         |     |          |          |        |         |
|---------|---------------|--------------|----|----------|----------|---------|--------|-----------|-----|----------|----------|---------|----------|---------|-----|----------|----------|--------|---------|
| UGT2B10 | GI_27552756-S | Chr4tp-23H10 | 4  | -750788  | -580780  | 4.7695  | 0.2665 | 1.3933 +  | YRI | 69211472 | 69877256 | 665784  | Chr4_9   | dup     | 102 | 68998845 | 69296476 | out    | 580780  |
| UGT2B11 | GI_4507822-S  | Chr4tp-23H10 | 4  | -1120655 | -950647  | 11.4101 | 0.566  | 4.3649 +  | YRI | 69211472 | 70247123 | 1035651 | Chr4_9   | dup     | 102 | 68998845 | 69296476 | out    | 950647  |
| UGT2B17 | GI_4507820-S  | Chr4tp-23H10 | 4  | -105361  | 64647    | 10.4865 | 0.5329 | 4.6238 +  | YRI | 69211472 | 69231829 | 20357   | Chr4_9   | dup     | 102 | 68998845 | 69296476 | inside | 0       |
| UGT2B7  | GI_4507824-S  | Chr4tp-23H10 | 4  | -1032588 | -862580  | 11.0417 | 0.5531 | 4.0765 +  | YRI | 69211472 | 70159056 | 947584  | Chr4_9   | dup     | 102 | 68998845 | 69296476 | out    | 862580  |
| ZBED4   | GI_7662217-S  | Chr22tp-4F6  | 22 | -1507386 | -1465764 | 3.6564  | 0.1976 | 1.4189 +  | YRI | 47115941 | 48602516 | 1486575 | Chr22_14 | dup     | 7   | 47095130 | 47136752 | out    | 1465764 |
| ZNF265  | GI_42741681-S | Chr1tp-4C10  | 1  | 1222167  | 1357555  | 3.6414  | 0.2133 | 0.5239 +  | YRI | 72531140 | 71241279 | 1289861 | Chr1_27  | dup     | 17  | 72454417 | 72598834 | out    | 1213138 |
| ZNF558  | GI_21687263-S | Chr19tp-5H2  | 19 | -22902   | 51275    | 3.0914  | 0.1712 | -0.5779 - | YRI | 8795759  | 8781572  | 14187   | Chr19_1  | complex | 128 | 8758670  | 8832847  | inside | 0       |

Table S5: Associations of CNVs with gene expression up to 6Mb at 0.001

| Gene_label    | Gene_ID       | CNV_Label    | Gene_Chromosome | CNV_Chromosome | Gene_distance    |              | pvalue  | "-logp  | Adjusted_R^2 | Gradient | POP |
|---------------|---------------|--------------|-----------------|----------------|------------------|--------------|---------|---------|--------------|----------|-----|
|               |               |              |                 |                | Gene_distance_fr | om_CNV_start |         |         |              |          |     |
| UGT2B17       | GI_4507820-S  | Chr4tp-23H10 | 4               | 4              | -131829          | 568171       | 0       | 16.029  | 0.7066       | 3.7396   | CEU |
| UGT2B11       | GI_4507822-S  | Chr4tp-23H10 | 4               | 4              | -1147123         | -447123      | 0       | 13.4627 | 0.6383       | 2.9815   | CEU |
| UGT2B7        | GI_4507824-S  | Chr4tp-23H10 | 4               | 4              | -1059056         | -359056      | 0       | 11.656  | 0.581        | 2.591    | CEU |
| HLA-DQA2      | GI_11095446-S | Chr6tp-5C11  | 6               | 6              | -317635          | -227089      | 0       | 10.3172 | 0.5459       | 3.5736   | CEU |
| Hs.463184     | Hs.463184-S   | Chr17tp-2G12 | 17              | 17             | 514083           | 804083       | 0.00002 | 4.6957  | 0.2705       | 0.116    | CEU |
| LOC90786      | GI_14756242-S | Chr12tp-19H4 | 12              | 12             | 4121401          | 4381401      | 9.2E-05 | 4.0357  | 0.2601       | 0.0466   | CEU |
| MRPS26        | GI_39812071-S | Chr20tp-4A10 | 20              | 20             | -1566433         | -1376433     | 0.00052 | 3.2876  | 0.187        | 0.2165   | CEU |
| HLA-DQA1      | GI_18426974-S | Chr6tp-5C11  | 6               | 6              | -215437          | -124891      | 0.00011 | 3.9797  | 0.2311       | -3.8628  | CEU |
| HLA-DRB5      | GI_26665892-S | Chr6tp-5C12  | 6               | 6              | -43225           | 66775        | 0.00066 | 3.1792  | 0.1769       | -0.9534  | CEU |
| DKFZp761G2113 | GI_42661165-S | Chr17tp-2G12 | 17              | 17             | 1884370          | 2174370      | 0.00103 | 2.9859  | 0.1643       | 0.1262   | CEU |
| C20orf194     | GI_37556073-S | Chr20tp-4A10 | 20              | 20             | -1769914         | -1579914     | 0.00173 | 2.7626  | 0.1522       | 0.1758   | CEU |
| CGI-96        | GI_25092724-S | Chr22tp-8C6  | 22              | 22             | -63284           | 136716       | 0.00069 | 3.1614  | 0.1757       | 0.4065   | CEU |
| NOL5A         | GI_32483373-S | Chr20tp-4A10 | 20              | 20             | -1176981         | -986981      | 0.00133 | 2.8778  | 0.1599       | 0.3228   | CEU |
| UGT2B10       | GI_27552756-S | Chr4tp-23H10 | 4               | 4              | -777256          | -77256       | 0.00056 | 3.2558  | 0.1789       | 0.8646   | CEU |
| Hs.428161     | Hs.428161-S   | Chr15tp-9C6  | 15              | 15             | -2808207         | -2108207     | 0.00635 | 2.197   | 0.1063       | 0.1162   | CEU |
| UGT2B11       | GI_4507822-S  | Chr4tp-23H10 | 4               | 4              | -1147123         | -447123      | 0       | 12.3091 | 0.6026       | 1.2525   | YRI |
| UGT2B7        | GI_4507824-S  | Chr4tp-23H10 | 4               | 4              | -1059056         | -359056      | 0       | 11.8636 | 0.588        | 1.1665   | YRI |
| HLA-DRB5      | GI_26665892-S | Chr6tp-5C12  | 6               | 6              | -43225           | 66775        | 0       | 11.6926 | 0.6096       | -3.05    | YRI |
| UGT2B17       | GI_4507820-S  | Chr4tp-23H10 | 4               | 4              | -131829          | 568171       | 0       | 10.9767 | 0.5572       | 1.3194   | YRI |
| CGI-96        | GI_25092724-S | Chr22tp-8C6  | 22              | 22             | -63284           | 136716       | 0       | 9.743   | 0.5235       | 0.4464   | YRI |
| HLA-DRB5      | GI_26665892-S | Chr6tp-5C11  | 6               | 6              | -89827           | 719          | 0       | 7.5441  | 0.4458       | 3.3835   | YRI |
| UGT2B10       | GI_27552756-S | Chr4tp-23H10 | 4               | 4              | -777256          | -77256       | 3E-06   | 5.4612  | 0.3095       | 0.4182   | YRI |
| LOC388673     | GI_41115452-S | Chr1tp-7D2   | 1               | 1              | -3989428         | -3539428     | 6E-06   | 5.23    | 0.3107       | 0.1098   | YRI |
| HLA-DQA2      | GI_11095446-S | Chr6tp-5C11  | 6               | 6              | -317635          | -227089      | 0.00001 | 5.0017  | 0.3072       | 1.2221   | YRI |
| LOC127069     | GI_17437031-S | Chr1tp-15A9  | 1               | 1              | -132616          | 108799       | 0.00043 | 3.3668  | 0.189        | 0.0722   | YRI |
| ZNF265        | GI_42741681-S | Chr1tp-4C10  | 1               | 1              | 1235858          | 1283182      | 0.00062 | 3.2108  | 0.1883       | 0.0892   | YRI |

Figure S1

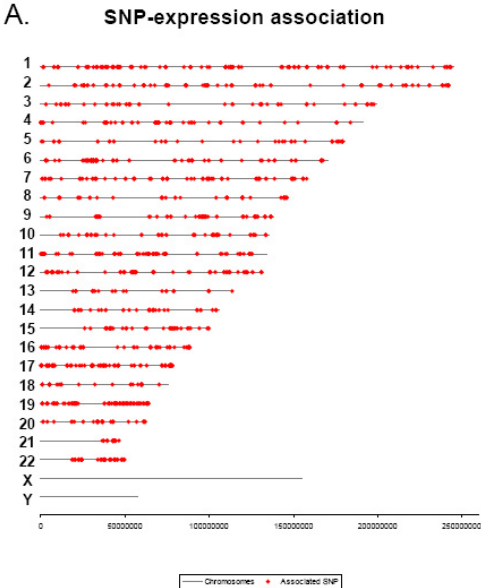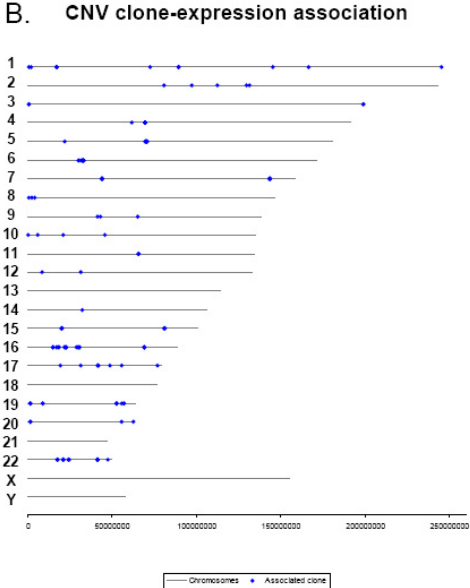

Figure S2A

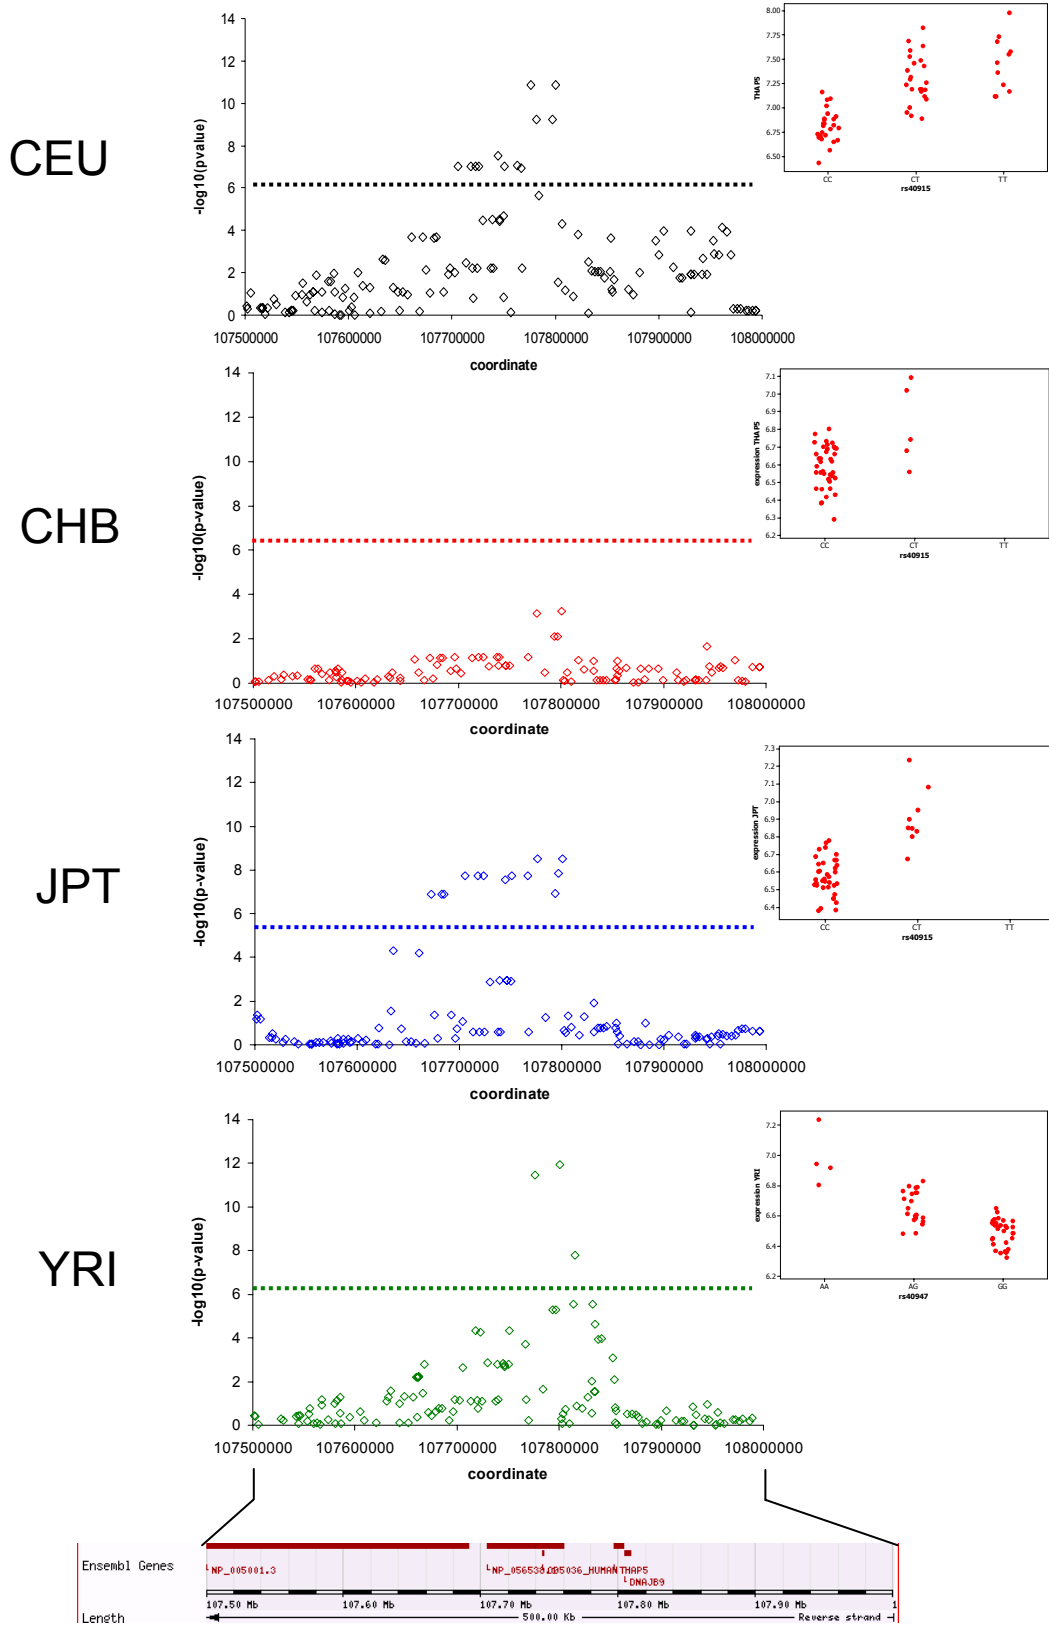





Figure S2C

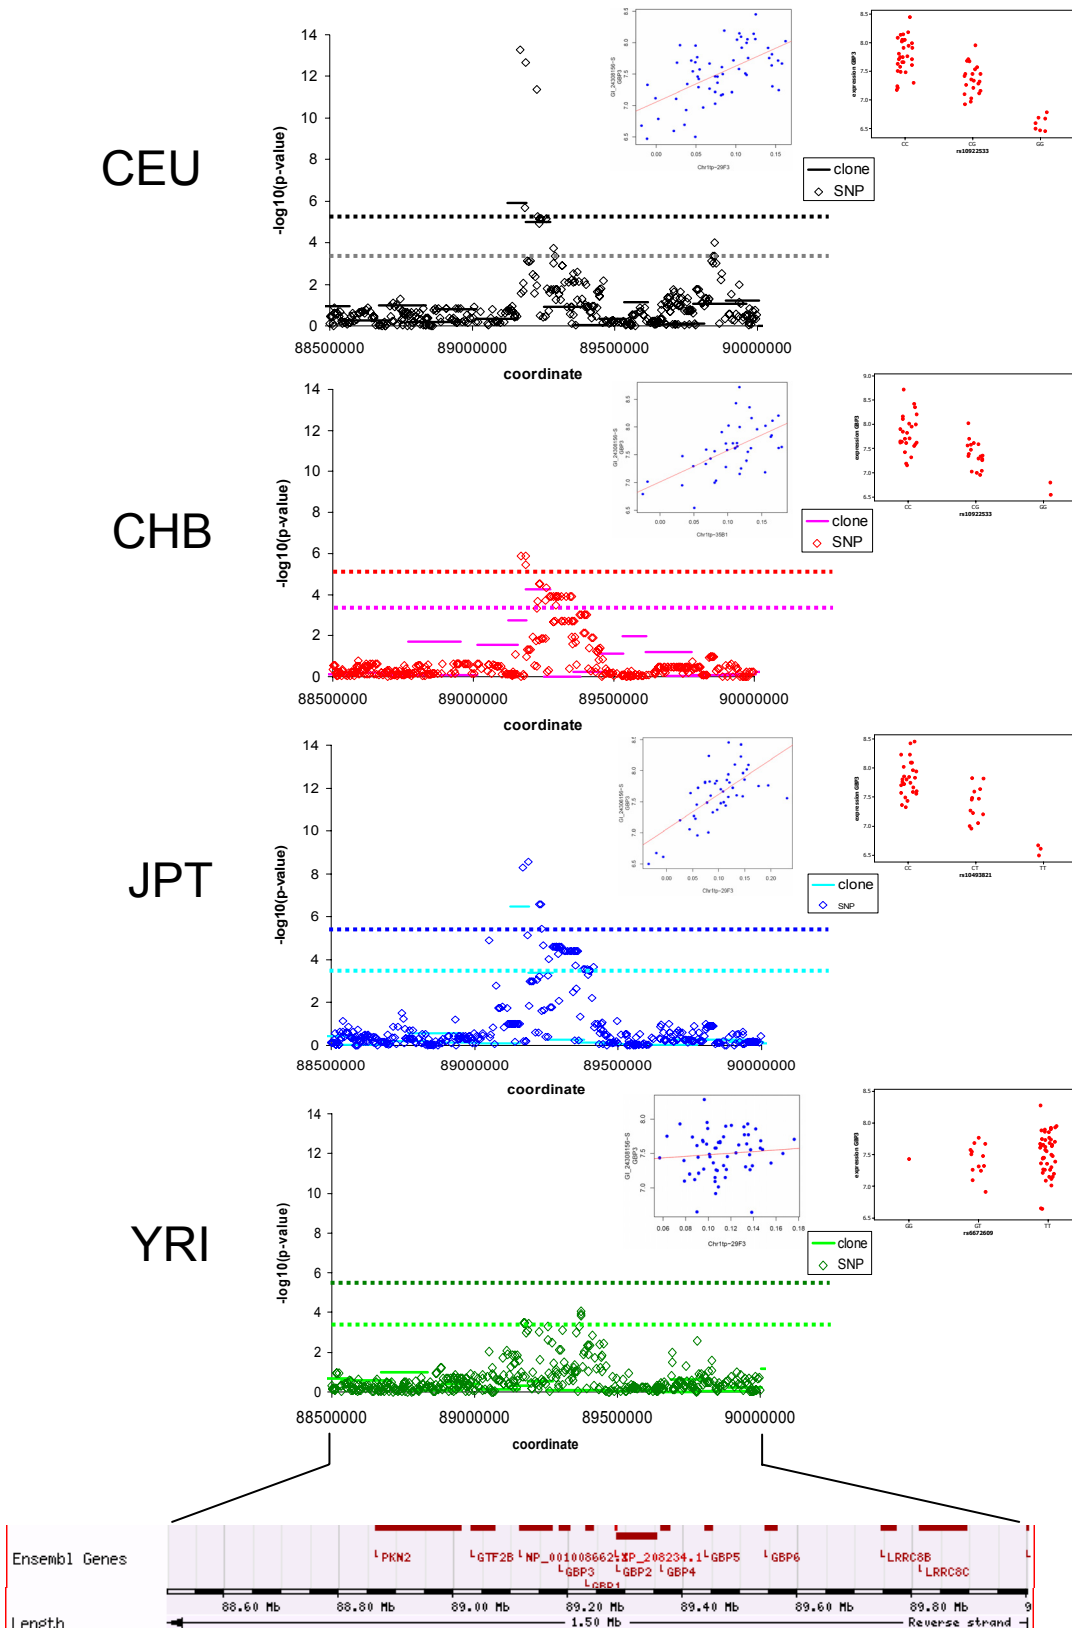

Figure S3. Distribution of p-values for all SNP-expression associations (SNP-probe distance < 1Mb) and all clone-expression associations (clone midpoint-probe distance < 2Mb).

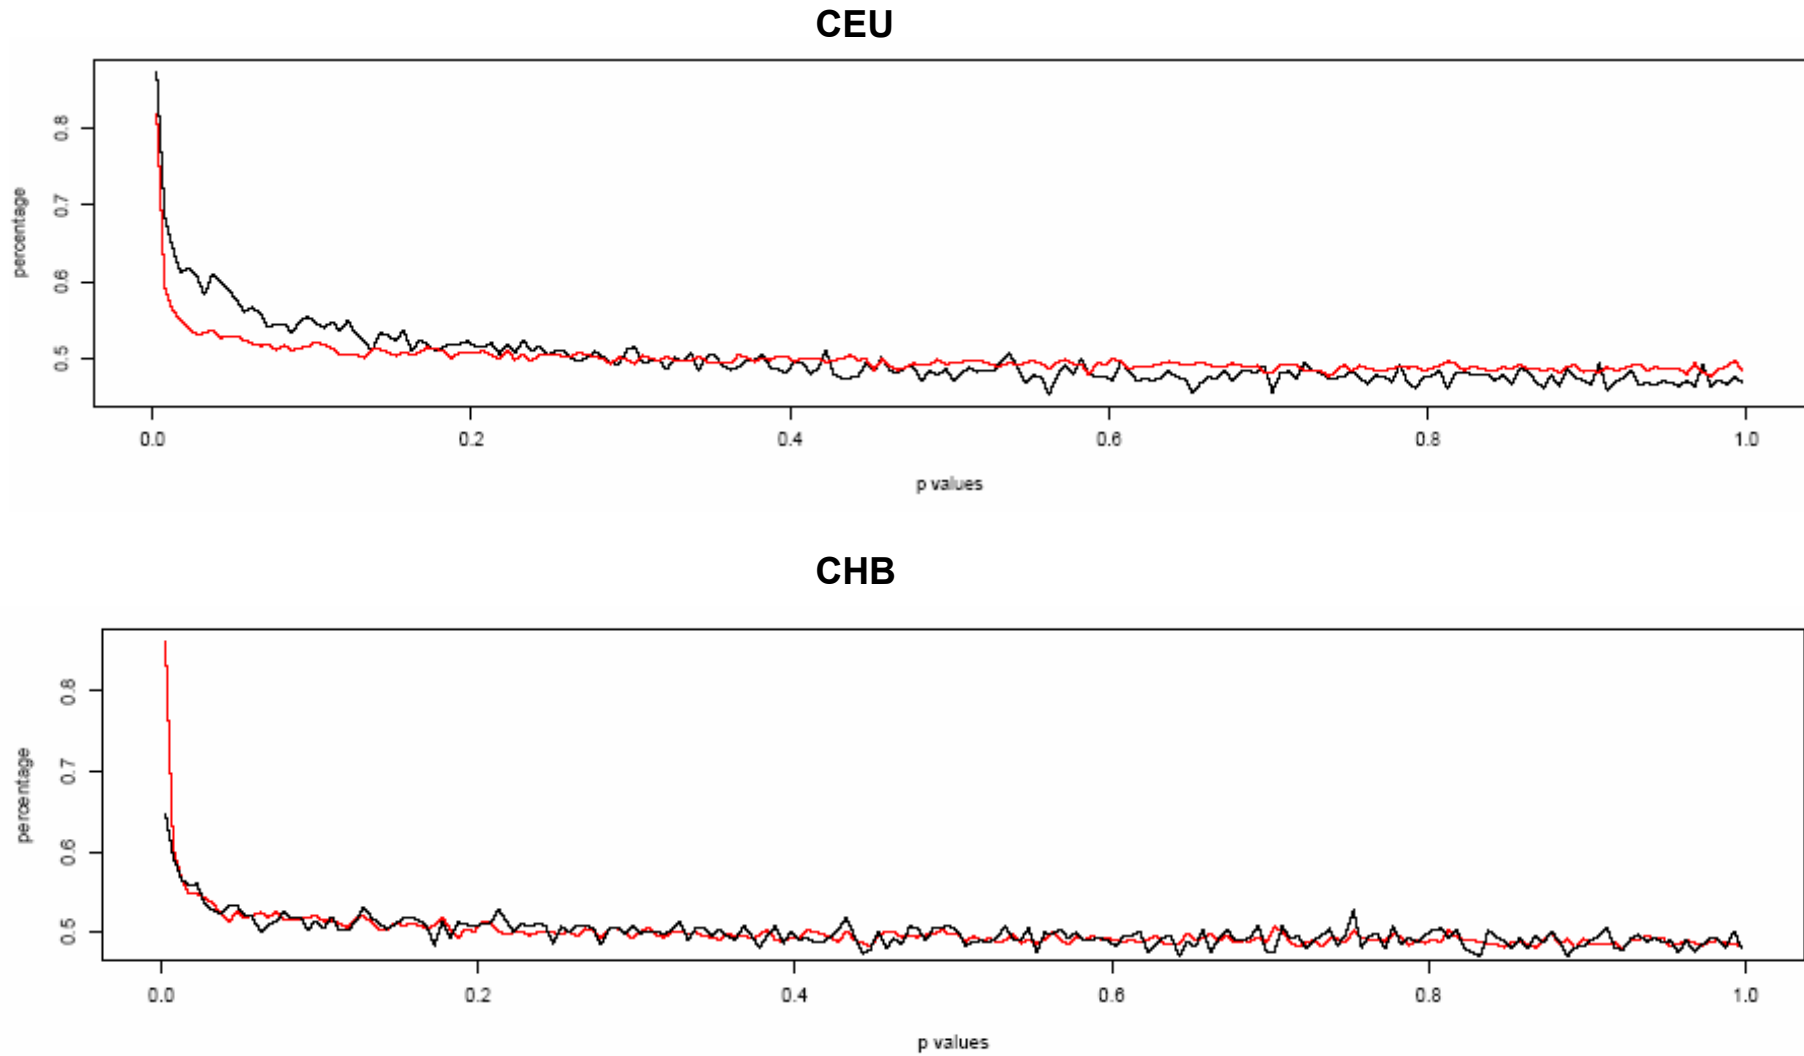

Figure S3 (cont). Distribution of p-values for all SNP-expression associations (SNP-probe distance < 1Mb) and all clone-expression associations (clone midpoint-probe distance < 2Mb).

### JPT

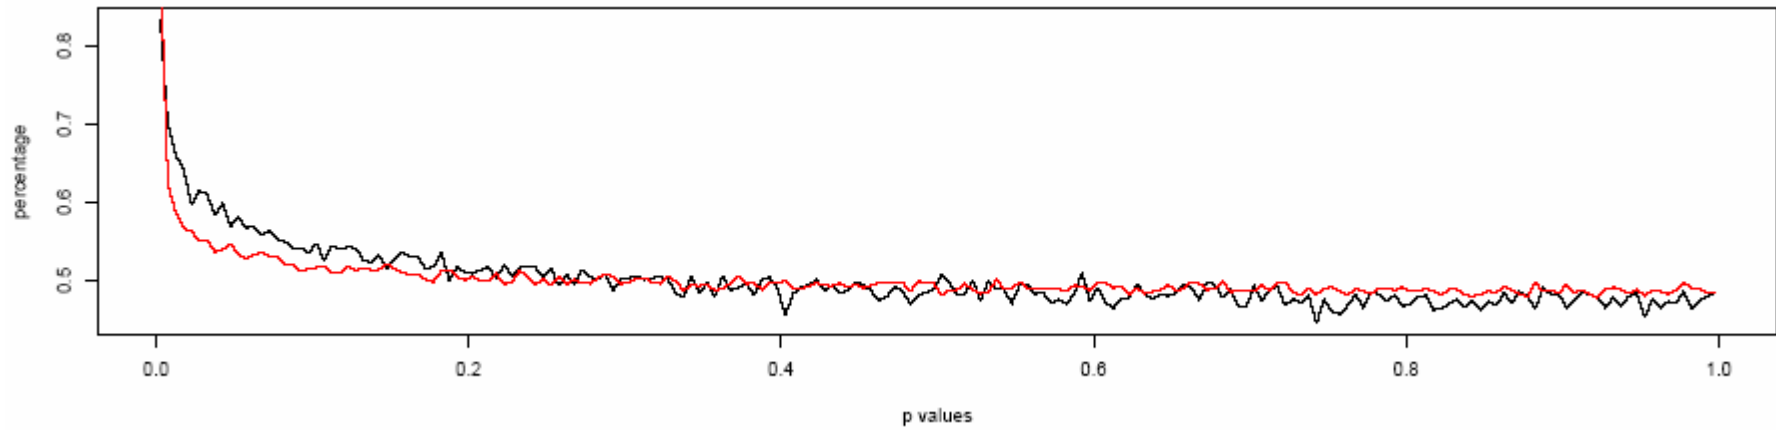

### YRI

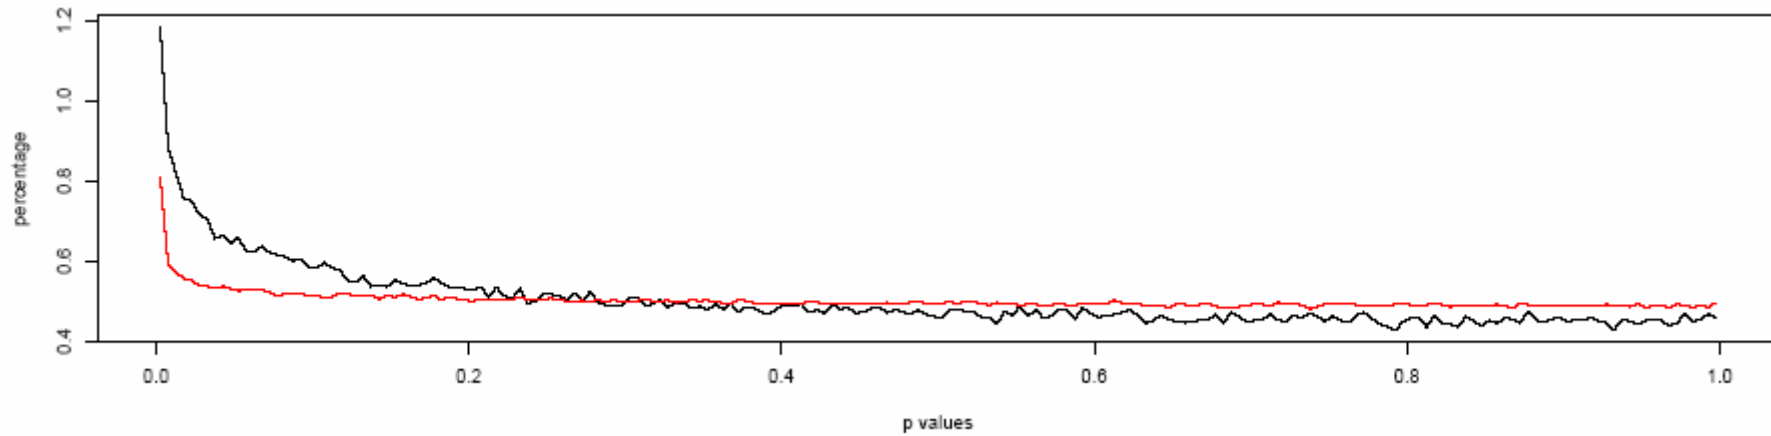

Supplement: NIHMS4374-supplement-Suppl_Data.pdf [file NIHMS4374-supplement-Suppl_Data.pdf]
